# Supplementary material for: Beyond the Tailpipe: Market-Wide Analysis of All US Vehicles Shows the Climate Benefits of Electrification
Source: Research Square preprint supplement (doi:10.21203/rs.3.rs-6762195/v1), 2025-07-30
Supplement: Supplementary file 1 [file aa54432859034d3df24f16bd.xlsx]

## Sheet: Cover page
	Supplementary data tables for Beyond the Tailpipe: Market-Wide Analysis of All US Vehicles Shows the Climate Benefits of Electrification Nick Santero1, Laurel Nelson¹, Yunzhu Chen², Marisa Meredith¹, Pablo Busch², Alissa Kendall³* ¹Rivian Automotive; Irvine, 92606, USA. ²Energy and Efficiency Institute, University of California Davis; Davis, 95616, USA. ³Department of Civil and Environmental Engi…

## Sheet: Figure 1 - Histogram
Vehicle #	ICEV	HEV	PHEV	BEV
1	578.995	#N/A	#N/A	#N/A
2	517.685	#N/A	#N/A	#N/A
3	434.586	#N/A	#N/A	#N/A
4	#N/A	359.563	#N/A	#N/A
5	534.072	#N/A	#N/A	#N/A
6	568.311	#N/A	#N/A	#N/A
7	569.663	#N/A	#N/A	#N/A
8	592.492	#N/A	#N/A	#N/A
9	396.046	#N/A	#N/A	#N/A
10	504.605	#N/A	#N/A	#N/A
11	517.37	#N/A	#N/A	#N/A
12	395.002	#N/A	#N/A	#N/A
13	#N/A	315.06	#N/A	#N/A
14	374.417	#N/A	#N/A	#N/A
15	417.665	#N/A	#N/A	#N/A
16	#N/A	352.705	#N/A	#N/A
17	445.318	#N/A	#N/A	#N/A
18	725.253	#N/A	#N/A	#N/A
19	609.821	#N/A	#N/A	#N/A
20	693.96	#N/A	#N/A	#N/A
21	616.87	#N/A	#N/A	#N/A
22	#N/A	713.533	#N/A	#N/A
23	#N/A	#N/A	#N/A	201.672
24	440.735	#N/A	#N/A	#N/A
25	517.958	#N/A	#N/A	#N/A
26	#N/A	523.791	#N/A	#N/A
27	532.424	#N/A	#N/A	#N/A
28	#N/A	523.074	#N/A	#N/A
29	703.369	#N/A	#N/A	#N/A
30	#N/A	549.105	#N/A	#N/A
31	#N/A	#N/A	413.394	#N/A
32	713.592	#N/A	#N/A	#N/A
33	#N/A	546.249	#N/A	#N/A
34	#N/A	573.017	#N/A	#N/A
35	#N/A	#N/A	513.212	#N/A
36	445.792	#N/A	#N/A	#N/A
37	443.758	#N/A	#N/A	#N/A
38	#N/A	#N/A	348.492	#N/A
39	445.165	#N/A	#N/A	#N/A
40	444.819	#N/A	#N/A	#N/A
41	#N/A	#N/A	371.483	#N/A
42	445.133	#N/A	#N/A	#N/A
43	#N/A	476.857	#N/A	#N/A
44	#N/A	464.847	#N/A	#N/A
45	#N/A	592.476	#N/A	#N/A
46	503.285	#N/A	#N/A	#N/A
47	634.619	#N/A	#N/A	#N/A
48	#N/A	#N/A	#N/A	182.724
49	#N/A	#N/A	#N/A	224.341
50	633.33	#N/A	#N/A	#N/A
51	457.093	#N/A	#N/A	#N/A
52	471.365	#N/A	#N/A	#N/A
53	639.656	#N/A	#N/A	#N/A
54	#N/A	465.889	#N/A	#N/A
55	645.434	#N/A	#N/A	#N/A
56	#N/A	479.824	#N/A	#N/A
57	695.373	#N/A	#N/A	#N/A
58	609.472	#N/A	#N/A	#N/A
59	695.373	#N/A	#N/A	#N/A
60	628.57	#N/A	#N/A	#N/A
61	456.554	#N/A	#N/A	#N/A
62	500.321	#N/A	#N/A	#N/A
63	452.475	#N/A	#N/A	#N/A
64	422.02	#N/A	#N/A	#N/A
65	#N/A	#N/A	347.255	#N/A
66	#N/A	#N/A	#N/A	139.35
67	847.463	#N/A	#N/A	#N/A
68	845.053	#N/A	#N/A	#N/A
69	869.446	#N/A	#N/A	#N/A
70	504.817	#N/A	#N/A	#N/A
71	549.689	#N/A	#N/A	#N/A
72	#N/A	#N/A	295.98	#N/A
73	538.382	#N/A	#N/A	#N/A
74	639.15	#N/A	#N/A	#N/A
75	502.722	#N/A	#N/A	#N/A
76	469.931	#N/A	#N/A	#N/A
77	505.931	#N/A	#N/A	#N/A
78	450.094	#N/A	#N/A	#N/A
79	663.247	#N/A	#N/A	#N/A
80	602.42	#N/A	#N/A	#N/A
81	576.599	#N/A	#N/A	#N/A
82	#N/A	#N/A	391.483	#N/A
83	752.824	#N/A	#N/A	#N/A
84	483.434	#N/A	#N/A	#N/A
85	666.625	#N/A	#N/A	#N/A
86	#N/A	708.906	#N/A	#N/A
87	601.044	#N/A	#N/A	#N/A
88	#N/A	598.857	#N/A	#N/A
89	#N/A	#N/A	466.889	#N/A
90	596.91	#N/A	#N/A	#N/A
91	#N/A	624.695	#N/A	#N/A
92	695.695	#N/A	#N/A	#N/A
93	586.867	#N/A	#N/A	#N/A
94	#N/A	490.831	#N/A	#N/A
95	598.386	#N/A	#N/A	#N/A
96	676.756	#N/A	#N/A	#N/A
97	480.774	#N/A	#N/A	#N/A
98	475.59	#N/A	#N/A	#N/A
99	565.558	#N/A	#N/A	#N/A
100	630.522	#N/A	#N/A	#N/A
101	585.354	#N/A	#N/A	#N/A
102	620.288	#N/A	#N/A	#N/A
103	636.043	#N/A	#N/A	#N/A
104	644.32	#N/A	#N/A	#N/A
105	#N/A	#N/A	590.64	#N/A
106	890.448	#N/A	#N/A	#N/A
107	945.02	#N/A	#N/A	#N/A
108	745.964	#N/A	#N/A	#N/A
109	876.451	#N/A	#N/A	#N/A
110	880.491	#N/A	#N/A	#N/A
111	634.145	#N/A	#N/A	#N/A
112	637.915	#N/A	#N/A	#N/A
113	#N/A	#N/A	614.821	#N/A
114	#N/A	#N/A	#N/A	215.207
115	713.188	#N/A	#N/A	#N/A
116	476.514	#N/A	#N/A	#N/A
117	517.793	#N/A	#N/A	#N/A
118	445.269	#N/A	#N/A	#N/A
119	#N/A	339.604	#N/A	#N/A
120	675.665	#N/A	#N/A	#N/A
121	553.901	#N/A	#N/A	#N/A
122	#N/A	522.149	#N/A	#N/A
123	#N/A	#N/A	#N/A	249.062
124	636.133	#N/A	#N/A	#N/A
125	#N/A	557.906	#N/A	#N/A
126	503.114	#N/A	#N/A	#N/A
127	#N/A	360.889	#N/A	#N/A
128	578.203	#N/A	#N/A	#N/A
129	497.417	#N/A	#N/A	#N/A
130	602.927	#N/A	#N/A	#N/A
131	#N/A	#N/A	422.681	#N/A
132	508.716	#N/A	#N/A	#N/A
133	561.039	#N/A	#N/A	#N/A
134	683.521	#N/A	#N/A	#N/A
135	413.632	#N/A	#N/A	#N/A
136	#N/A	345.138	#N/A	#N/A
137	#N/A	#N/A	234.316	#N/A
138	572.802	#N/A	#N/A	#N/A
139	#N/A	#N/A	#N/A	199.809
140	#N/A	#N/A	298.718	#N/A
141	490.234	#N/A	#N/A	#N/A
142	546.452	#N/A	#N/A	#N/A
143	590.303	#N/A	#N/A	#N/A
144	452.33	#N/A	#N/A	#N/A
145	490.407	#N/A	#N/A	#N/A
146	774.974	#N/A	#N/A	#N/A
147	640.962	#N/A	#N/A	#N/A
148	488.533	#N/A	#N/A	#N/A
149	549.079	#N/A	#N/A	#N/A
150	574.636	#N/A	#N/A	#N/A
151	524.994	#N/A	#N/A	#N/A
152	634.206	#N/A	#N/A	#N/A
153	455.886	#N/A	#N/A	#N/A
154	677.841	#N/A	#N/A	#N/A
155	606.261	#N/A	#N/A	#N/A
156	742.896	#N/A	#N/A	#N/A
157	643.09	#N/A	#N/A	#N/A
158	727.128	#N/A	#N/A	#N/A
159	641.539	#N/A	#N/A	#N/A
160	445.41	#N/A	#N/A	#N/A
161	581.834	#N/A	#N/A	#N/A
162	528.552	#N/A	#N/A	#N/A
163	652.505	#N/A	#N/A	#N/A
164	698.633	#N/A	#N/A	#N/A
165	616.094	#N/A	#N/A	#N/A
166	478.712	#N/A	#N/A	#N/A
167	749.633	#N/A	#N/A	#N/A
168	643.959	#N/A	#N/A	#N/A
169	418.352	#N/A	#N/A	#N/A
170	470.223	#N/A	#N/A	#N/A
171	504.799	#N/A	#N/A	#N/A
172	528.231	#N/A	#N/A	#N/A
173	#N/A	#N/A	#N/A	223.771
174	474.398	#N/A	#N/A	#N/A
175	#N/A	#N/A	#N/A	158.13
176	577.939	#N/A	#N/A	#N/A
177	654.116	#N/A	#N/A	#N/A
178	446.455	#N/A	#N/A	#N/A
179	403.826	#N/A	#N/A	#N/A
180	414.033	#N/A	#N/A	#N/A
181	#N/A	#N/A	#N/A	210.764
182	466.77	#N/A	#N/A	#N/A
183	592.962	#N/A	#N/A	#N/A
184	565.299	#N/A	#N/A	#N/A
185	534.613	#N/A	#N/A	#N/A
186	520.187	#N/A	#N/A	#N/A
187	#N/A	420.312	#N/A	#N/A
188	#N/A	#N/A	284.658	#N/A
189	485.22	#N/A	#N/A	#N/A
190	#N/A	363.237	#N/A	#N/A
191	#N/A	#N/A	266.927	#N/A
192	#N/A	#N/A	#N/A	191.314
193	#N/A	#N/A	#N/A	193.071
194	537.072	#N/A	#N/A	#N/A
195	526.579	#N/A	#N/A	#N/A
196	589.391	#N/A	#N/A	#N/A
197	#N/A	622.411	#N/A	#N/A
198	#N/A	#N/A	#N/A	193.112
199	544.464	#N/A	#N/A	#N/A
200	371.254	#N/A	#N/A	#N/A
201	#N/A	265.453	#N/A	#N/A
202	#N/A	#N/A	#N/A	177.702
203	#N/A	#N/A	#N/A	168.791
204	408.831	#N/A	#N/A	#N/A
205	#N/A	#N/A	#N/A	151.373
206	492.128	#N/A	#N/A	#N/A
207	401.021	#N/A	#N/A	#N/A
208	#N/A	281.965	#N/A	#N/A
209	444.665	#N/A	#N/A	#N/A
210	408.536	#N/A	#N/A	#N/A
211	544.318	#N/A	#N/A	#N/A
212	544.451	#N/A	#N/A	#N/A
213	#N/A	559.844	#N/A	#N/A
214	#N/A	#N/A	#N/A	188.217
215	700.849	#N/A	#N/A	#N/A
216	#N/A	634.032	#N/A	#N/A
217	593.025	#N/A	#N/A	#N/A
218	#N/A	572.398	#N/A	#N/A
219	633.361	#N/A	#N/A	#N/A
220	#N/A	581.659	#N/A	#N/A
221	#N/A	#N/A	347.676	#N/A
222	630.808	#N/A	#N/A	#N/A
223	469.341	#N/A	#N/A	#N/A
224	550.805	#N/A	#N/A	#N/A
225	433.806	#N/A	#N/A	#N/A
226	499.183	#N/A	#N/A	#N/A
227	#N/A	387.169	#N/A	#N/A
228	#N/A	#N/A	273.942	#N/A
229	498.948	#N/A	#N/A	#N/A
230	#N/A	351.75	#N/A	#N/A
231	#N/A	#N/A	261.672	#N/A
232	576	#N/A	#N/A	#N/A
233	#N/A	#N/A	#N/A	178.07
234	376.689	#N/A	#N/A	#N/A
235	410.014	#N/A	#N/A	#N/A
236	#N/A	275.558	#N/A	#N/A
237	#N/A	#N/A	#N/A	156.355
238	#N/A	#N/A	205.567	#N/A
239	342.993	#N/A	#N/A	#N/A
240	390.258	#N/A	#N/A	#N/A
241	404.238	#N/A	#N/A	#N/A
242	450.613	#N/A	#N/A	#N/A
243	#N/A	321.981	#N/A	#N/A
244	551.797	#N/A	#N/A	#N/A
245	#N/A	#N/A	#N/A	189.053
246	429.227	#N/A	#N/A	#N/A
247	468.008	#N/A	#N/A	#N/A
248	540.163	#N/A	#N/A	#N/A
249	470.608	#N/A	#N/A	#N/A
250	412.408	#N/A	#N/A	#N/A
251	#N/A	#N/A	#N/A	158.497
252	406.599	#N/A	#N/A	#N/A
253	670.783	#N/A	#N/A	#N/A
254	#N/A	#N/A	529.347	#N/A
255	659.098	#N/A	#N/A	#N/A
256	881.506	#N/A	#N/A	#N/A
257	555.053	#N/A	#N/A	#N/A
258	#N/A	625.064	#N/A	#N/A
259	#N/A	642.544	#N/A	#N/A
260	#N/A	#N/A	#N/A	222.987
261	460.912	#N/A	#N/A	#N/A
262	490.685	#N/A	#N/A	#N/A
263	#N/A	480.071	#N/A	#N/A
264	586.144	#N/A	#N/A	#N/A
265	579.737	#N/A	#N/A	#N/A
266	#N/A	457.156	#N/A	#N/A
267	515.656	#N/A	#N/A	#N/A
268	444.239	#N/A	#N/A	#N/A
269	#N/A	507.065	#N/A	#N/A
270	499.458	#N/A	#N/A	#N/A
271	#N/A	#N/A	#N/A	219.496
272	#N/A	#N/A	#N/A	220.921
273	523.802	#N/A	#N/A	#N/A
274	543.554	#N/A	#N/A	#N/A
275	#N/A	590.594	#N/A	#N/A
276	715.64	#N/A	#N/A	#N/A
277	#N/A	581.327	#N/A	#N/A
278	770.579	#N/A	#N/A	#N/A
279	#N/A	495.019	#N/A	#N/A
280	#N/A	#N/A	#N/A	183.069
281	#N/A	#N/A	#N/A	221.991
282	444.98	#N/A	#N/A	#N/A
283	458.562	#N/A	#N/A	#N/A
284	#N/A	458.235	#N/A	#N/A
285	#N/A	#N/A	325.025	#N/A
286	488.596	#N/A	#N/A	#N/A
287	#N/A	#N/A	350.207	#N/A
288	460.402	#N/A	#N/A	#N/A
289	474.645	#N/A	#N/A	#N/A
290	320.296	#N/A	#N/A	#N/A
291	458.275	#N/A	#N/A	#N/A
292	504.608	#N/A	#N/A	#N/A
293	505.054	#N/A	#N/A	#N/A
294	557.385	#N/A	#N/A	#N/A
295	769.35	#N/A	#N/A	#N/A
296	784.926	#N/A	#N/A	#N/A
297	616.486	#N/A	#N/A	#N/A
298	554.366	#N/A	#N/A	#N/A
299	412.923	#N/A	#N/A	#N/A
300	702.166	#N/A	#N/A	#N/A
301	535.152	#N/A	#N/A	#N/A
302	490.182	#N/A	#N/A	#N/A
303	394.036	#N/A	#N/A	#N/A
304	#N/A	#N/A	#N/A	189.492
305	644.653	#N/A	#N/A	#N/A
306	374.076	#N/A	#N/A	#N/A
307	#N/A	#N/A	#N/A	149.439
308	510.665	#N/A	#N/A	#N/A
309	530.319	#N/A	#N/A	#N/A
310	395.844	#N/A	#N/A	#N/A
311	377.934	#N/A	#N/A	#N/A
312	353.032	#N/A	#N/A	#N/A
313	560.974	#N/A	#N/A	#N/A
314	969.165	#N/A	#N/A	#N/A
315	#N/A	#N/A	#N/A	249.367
316	#N/A	#N/A	#N/A	252.711
317	569.617	#N/A	#N/A	#N/A
318	414.185	#N/A	#N/A	#N/A
319	#N/A	#N/A	297.011	#N/A
320	433.728	#N/A	#N/A	#N/A
321	459.385	#N/A	#N/A	#N/A
322	#N/A	#N/A	#N/A	161.95
323	515.692	#N/A	#N/A	#N/A
324	400.728	#N/A	#N/A	#N/A
325	423.907	#N/A	#N/A	#N/A
326	548.708	#N/A	#N/A	#N/A
327	#N/A	#N/A	#N/A	181.504
328	#N/A	#N/A	#N/A	152.861
329	#N/A	#N/A	#N/A	143.791
330	#N/A	#N/A	#N/A	177.998
331	#N/A	#N/A	#N/A	198.671
332	#N/A	#N/A	#N/A	166.319
333	741.967	#N/A	#N/A	#N/A
334	664.925	#N/A	#N/A	#N/A
335	487.552	#N/A	#N/A	#N/A
336	#N/A	349.175	#N/A	#N/A
337	#N/A	#N/A	257.044	#N/A
338	512.49	#N/A	#N/A	#N/A
339	#N/A	405.585	#N/A	#N/A
340	#N/A	#N/A	#N/A	169.074
341	705.82	#N/A	#N/A	#N/A
342	#N/A	#N/A	#N/A	162.51
343	418.469	#N/A	#N/A	#N/A
344	#N/A	325.847	#N/A	#N/A
345	503.154	#N/A	#N/A	#N/A
346	#N/A	382.698	#N/A	#N/A
347	418.904	#N/A	#N/A	#N/A
348	#N/A	339.536	#N/A	#N/A
349	#N/A	#N/A	230.749	#N/A
350	#N/A	623.182	#N/A	#N/A
351	#N/A	383.876	#N/A	#N/A
352	604.131	#N/A	#N/A	#N/A
353	639.804	#N/A	#N/A	#N/A
354	#N/A	636.239	#N/A	#N/A
355	#N/A	350.651	#N/A	#N/A
356	504.139	#N/A	#N/A	#N/A
357	474.235	#N/A	#N/A	#N/A
358	#N/A	318.281	#N/A	#N/A
359	535.073	#N/A	#N/A	#N/A
360	646.705	#N/A	#N/A	#N/A
361	#N/A	443.619	#N/A	#N/A
362	569.533	#N/A	#N/A	#N/A
363	#N/A	525.717	#N/A	#N/A
364	459.494	#N/A	#N/A	#N/A
365	#N/A	#N/A	265.818	#N/A
366	537.528	#N/A	#N/A	#N/A
367	499.062	#N/A	#N/A	#N/A
368	#N/A	337.015	#N/A	#N/A
369	#N/A	#N/A	#N/A	166.166
370	398.114	#N/A	#N/A	#N/A
371	#N/A	292.431	#N/A	#N/A
372	361.81	#N/A	#N/A	#N/A
373	400.184	#N/A	#N/A	#N/A
374	#N/A	288.916	#N/A	#N/A
375	507.578	#N/A	#N/A	#N/A
376	#N/A	266.062	#N/A	#N/A
377	#N/A	#N/A	185.619	#N/A
378	406.918	#N/A	#N/A	#N/A
379	#N/A	345.152	#N/A	#N/A
380	660.218	#N/A	#N/A	#N/A
381	#N/A	#N/A	480.743	#N/A
382	589.586	#N/A	#N/A	#N/A
383	#N/A	#N/A	#N/A	207.226
384	508.346	#N/A	#N/A	#N/A
385	#N/A	#N/A	#N/A	177.591
386	#N/A	497.157	#N/A	#N/A
387	#N/A	#N/A	344.908	#N/A
388	#N/A	628.056	#N/A	#N/A
389	573.013	#N/A	#N/A	#N/A
390	#N/A	618.231	#N/A	#N/A
391	#N/A	761.434	#N/A	#N/A
392	578.37	#N/A	#N/A	#N/A
393	719.269	#N/A	#N/A	#N/A
394	719.269	#N/A	#N/A	#N/A
395	727.949	#N/A	#N/A	#N/A
396	#N/A	#N/A	444.885	#N/A
397	754.816	#N/A	#N/A	#N/A
398	593.55	#N/A	#N/A	#N/A
399	#N/A	#N/A	#N/A	172.286
400	437.254	#N/A	#N/A	#N/A
401	478.266	#N/A	#N/A	#N/A
402	#N/A	#N/A	#N/A	281.278
403	615.375	#N/A	#N/A	#N/A
404	645.284	#N/A	#N/A	#N/A
405	615.358	#N/A	#N/A	#N/A
406	#N/A	#N/A	463.972	#N/A
407	#N/A	#N/A	#N/A	216.781
408	#N/A	400.228	#N/A	#N/A
409	#N/A	460.042	#N/A	#N/A
410	#N/A	460.115	#N/A	#N/A
411	#N/A	486.982	#N/A	#N/A
412	#N/A	507.704	#N/A	#N/A
413	#N/A	556.705	#N/A	#N/A
414	#N/A	#N/A	#N/A	208.947
415	#N/A	#N/A	#N/A	184.963
416	707.914	#N/A	#N/A	#N/A
417	#N/A	721.25	#N/A	#N/A
418	#N/A	#N/A	#N/A	213.555
419	523.811	#N/A	#N/A	#N/A
420	588.021	#N/A	#N/A	#N/A
421	467.941	#N/A	#N/A	#N/A
422	505.325	#N/A	#N/A	#N/A
423	509.94	#N/A	#N/A	#N/A
424	#N/A	569.616	#N/A	#N/A
425	#N/A	569.616	#N/A	#N/A
426	#N/A	687.177	#N/A	#N/A
427	481.884	#N/A	#N/A	#N/A
428	467.909	#N/A	#N/A	#N/A
429	725.487	#N/A	#N/A	#N/A
430	734.367	#N/A	#N/A	#N/A
431	#N/A	#N/A	495.115	#N/A
432	1245.41	#N/A	#N/A	#N/A
433	780.952	#N/A	#N/A	#N/A
434	763.876	#N/A	#N/A	#N/A
435	481.458	#N/A	#N/A	#N/A
436	576.95	#N/A	#N/A	#N/A
437	414.151	#N/A	#N/A	#N/A
438	494.811	#N/A	#N/A	#N/A
439	447.339	#N/A	#N/A	#N/A
440	#N/A	#N/A	#N/A	176.901
441	364.84	#N/A	#N/A	#N/A
442	412.651	#N/A	#N/A	#N/A
443	#N/A	473.755	#N/A	#N/A
444	#N/A	489.497	#N/A	#N/A
445	#N/A	476.931	#N/A	#N/A
446	#N/A	497.504	#N/A	#N/A
447	#N/A	#N/A	313.01	#N/A
448	#N/A	542.316	#N/A	#N/A
449	#N/A	#N/A	324.491	#N/A
450	#N/A	#N/A	#N/A	183.845
451	#N/A	#N/A	#N/A	195.07
452	435.493	#N/A	#N/A	#N/A
453	#N/A	#N/A	271.763	#N/A
454	#N/A	474.697	#N/A	#N/A
455	#N/A	#N/A	298.275	#N/A
456	#N/A	#N/A	271.763	#N/A
457	#N/A	464.025	#N/A	#N/A
458	#N/A	#N/A	#N/A	196.986
459	#N/A	480.41	#N/A	#N/A

## Sheet: Figure 2 - 2x2
Vehicle #	Production volume	Powertrain	Segment	Track Size (m2)	Efficiency (MPGe)	Power (HP)	CO2e (g/mi)
1	57624	ICEV	large SUV	4.97031	21.7293	295.115	578.995
2	25920	ICEV	large SUV	4.49651	24.1417	272	517.685
3	76246	ICEV	large SUV	4.35715	29.8644	190	434.586
4	75283	HEV	large SUV	4.35715	37.3966	145	359.563
5	80202	ICEV	Van	5.11896	23.6028	280	534.072
6	44359	ICEV	large SUV	4.78426	22.0739	280	568.311
7	75039	ICEV	large SUV	4.95099	22.0696	285	569.663
8	68896	ICEV	Pickup	5.39767	20.9542	280	592.492
9	28049	ICEV	Sedan	4.23638	32.7179	200	396.046
10	10468	ICEV	small SUV	4.49651	25.0728	272	504.605
11	18244	ICEV	Sedan	4.6916	24.7677	293.028	517.37
12	61048	ICEV	Sedan	4.53367	33.0764	192	395.002
13	70532	HEV	Sedan	4.53367	43.7227	146	315.06
14	151870	ICEV	Sedan	4.24724	34.7965	170.096	374.417
15	31696	ICEV	small SUV	4.37573	31.5476	190	417.665
16	31017	HEV	small SUV	4.37573	39.1502	145	352.705
17	97235	ICEV	Sedan	4.23638	28.791	158	445.318
18	1172	ICEV	large SUV	5.14683	17.1759	674.448	725.253
19	136	ICEV	Sedan	4.64515	20.726	519.809	609.821
20	266	ICEV	Sedan	4.64515	17.8737	715	693.96
21	843	ICEV	Sedan	4.47793	20.3278	576.21	616.87
22	165	HEV	large SUV	5.02605	17.8454	631	713.533
23	8042	HEV	large SUV	5.02489	82.9172	543.511	201.672
24	25039	ICEV	large SUV	4.25007	29.0387	241	440.735
25	31477	ICEV	large SUV	4.606	24.6543	255.476	517.958
26	6390	HEV	large SUV	4.60486	24.2465	382	523.791
27	6373	ICEV	large SUV	4.64388	24.0814	274.94	532.424
28	2826	HEV	large SUV	4.64468	24.2465	382	523.074
29	6312	ICEV	large SUV	5.02338	18.009	543.152	703.369
30	36695	HEV	large SUV	5.02216	23.3785	335	549.105
31	14598	PHEV	large SUV	5.02771	30.7489	282	413.394
32	2724	ICEV	large SUV	5.02694	17.6295	553.812	713.592
33	6574	HEV	large SUV	5.01778	23.3912	335	546.249
34	21113	HEV	large SUV	5.24447	22.7773	398.49	573.017
35	2012	PHEV	large SUV	5.28624	23.8038	483	513.212
36	2629	ICEV	Sedan	4.16139	28.8483	228	445.792
37	2903	ICEV	Sedan	4.35159	29.2775	255	443.758
38	6526	PHEV	Sedan	4.51514	37.772	181	348.492
39	17802	ICEV	Sedan	4.52105	29.1702	255	445.165
40	12387	ICEV	Sedan	4.55453	29.1966	255	444.819
41	4659	PHEV	Sedan	4.78312	34.7303	181	371.483
42	8658	ICEV	Sedan	4.78576	29.1726	248	445.133
43	6239	HEV	Sedan	4.77862	27.2019	335	476.857
44	3440	HEV	Sedan	5.32334	28.7795	375	464.847
45	3691	HEV	Sedan	5.32334	21.9687	536	592.476
46	1829	ICEV	Sedan	4.81396	25.6576	335	503.285
47	299	ICEV	Sedan	4.9796	20.0151	523	634.619
48	21636	HEV	Sedan	4.58037	103.087	386.931	182.724
49	2406	HEV	Sedan	5.32412	86.0248	563	224.341
50	1354	ICEV	Sedan	4.42218	19.5392	453	633.33
51	407	ICEV	Sedan	4.16206	28.2605	301	457.093
52	2625	ICEV	Sedan	4.33446	27.2752	382	471.365
53	4544	ICEV	Sedan	4.5987	19.3257	497.217	639.656
54	5672	HEV	Sedan	4.51477	27.6507	382	465.889
55	3646	ICEV	Sedan	4.5987	19.2202	496.631	645.434
56	5411	HEV	Sedan	4.54655	27.036	382	479.824
57	1727	ICEV	Sedan	4.79417	17.8333	615.189	695.373
58	2354	ICEV	Sedan	4.75664	20.6716	523	609.472
59	2302	ICEV	Sedan	4.76384	17.8333	617	695.373
60	2324	ICEV	Sedan	4.7903	20.173	523	628.57
61	1636	ICEV	Sedan	4.19045	28.2992	228	456.554
62	16326	ICEV	small SUV	4.60181	25.9625	248	500.321
63	1239	ICEV	Sedan	3.9298	28.3458	312.299	452.475
64	26348	ICEV	Sedan	3.93854	30.8269	190.833	422.02
65	877	PHEV	Sedan	4.18064	37.4282	134	347.255
66	3809	HEV	Sedan	3.71612	107.568	181	139.35
67	1081	ICEV	Sedan	5.5556	14.9169	574.837	847.463
68	359	ICEV	Sedan	5.53128	14.8172	574.387	845.053
69	126	ICEV	Sedan	6.05285	14.4909	563	869.446
70	4098	ICEV	large SUV	4.60203	25.0149	296.142	504.817
71	73795	ICEV	Van	5.38838	22.909	286.604	549.689
72	26049	PHEV	Van	5.38838	44.5929	220	295.98
73	22697	ICEV	Van	5.38838	23.4633	287	538.382
74	49260	ICEV	large SUV	4.96286	19.9201	349.944	639.15
75	5617	ICEV	large SUV	4.12489	25.0045	270	502.722
76	854	ICEV	large SUV	3.97625	26.5796	177	469.931
77	13976	ICEV	large SUV	4.27219	24.8531	184.81	505.931
78	67142	ICEV	large SUV	4.05057	28.2066	200	450.094
79	70799	ICEV	Pickup	5.65138	18.7337	287.149	663.247
80	4558	ICEV	Pickup	5.67459	24.4707	260	602.42
81	227453	ICEV	large SUV	5.05048	21.9194	297.195	576.599
82	27097	PHEV	large SUV	4.94244	32.4644	270	391.483
83	11909	ICEV	large SUV	5.50892	16.9775	499.766	752.824
84	27392	ICEV	large SUV	3.95063	25.8342	177	483.434
85	21115	ICEV	large SUV	5.5662	19.1933	420	666.625
86	2519	HEV	large SUV	5.44412	17.9637	392	708.906
87	40673	ICEV	large SUV	4.65556	21.1549	301.164	601.044
88	48787	HEV	large SUV	4.676	20.7161	285	598.857
89	50908	PHEV	large SUV	4.92386	26.3454	270	466.889
90	3605	ICEV	large SUV	4.88108	24.4102	260	596.91
91	150741	HEV	Pickup	6.37423	20.2541	373.203	624.695
92	54053	ICEV	Pickup	6.28405	18.4761	379.364	695.695
93	5501	ICEV	Pickup	6.38074	25.4702	260	586.867
94	5593	HEV	large SUV	4.77522	26.0726	313.225	490.831
95	337	ICEV	large SUV	4.77522	21.0842	523	598.386
96	2173	ICEV	large SUV	4.96102	18.3814	399.445	676.756
97	3162	ICEV	Sedan	4.48318	26.841	304.549	480.774
98	419	ICEV	small SUV	4.5987	26.9957	280	475.59
99	17392	ICEV	Sedan	4.96641	22.4138	330.23	565.558
100	68362	ICEV	Sedan	4.82407	20.2519	441.608	630.522
101	91316	ICEV	Sedan	4.971	21.6561	363.543	585.354
102	901	ICEV	Sedan	4.93315	20.5066	430.665	620.288
103	602	ICEV	Sedan	4.49651	19.4464	621	636.043
104	275	ICEV	Sedan	5.20257	19.7963	440.535	644.32
105	476	PHEV	Sedan	4.29212	20.5671	654	590.64
106	554	ICEV	Sedan	4.51509	13.5642	792.747	890.448
107	70	ICEV	Sedan	5.21186	12.8562	709	945.02
108	570	ICEV	Sedan	4.4036	16.3195	711	745.964
109	36	ICEV	Sedan	4.46864	13.7039	823	876.451
110	113	ICEV	Sedan	4.58012	13.6362	785	880.491
111	550	ICEV	Sedan	4.36644	19.5106	612	634.145
112	389	ICEV	Sedan	4.45006	19.3828	612	637.915
113	655	PHEV	Sedan	4.41289	19.9297	770	614.821
114	6895	HEV	small SUV	4.99818	89.5672	562.743	215.207
115	127309	ICEV	large SUV	4.87464	17.5211	310.223	713.188
116	115535	ICEV	large SUV	4.28959	26.3286	189.532	476.514
117	52678	ICEV	large SUV	4.70089	24.5015	250.037	517.793
118	66734	ICEV	large SUV	4.29212	28.3876	203.826	445.269
119	8770	HEV	large SUV	4.30141	39.4196	163	339.604
120	60863	ICEV	large SUV	5.50902	18.8454	375	675.665
121	176437	ICEV	large SUV	5.15612	22.8782	318.259	553.901
122	1520	HEV	large SUV	5.1747	25.002	318	522.149
123	43063	HEV	Pickup	6.42491	67.3186	512.075	249.062
124	453109	ICEV	Pickup	6.47129	19.8997	379.931	636.133
125	60321	HEV	Pickup	6.48964	23.4322	400	557.906
126	38632	ICEV	Pickup	4.93044	25.0733	250	503.114
127	49598	HEV	Pickup	4.93315	36.775	162	360.889
128	32547	ICEV	Pickup	5.03186	21.7819	270	578.203
129	24533	ICEV	Van	4.7671	25.306	162	497.417
130	26975	ICEV	large SUV	5.1747	21.0686	400	602.927
131	3105	PHEV	large SUV	5.16541	30.4609	494	422.681
132	13218	ICEV	large SUV	4.36644	24.6731	250	508.716
133	20458	ICEV	large SUV	4.70089	22.5011	277.616	561.039
134	15430	ICEV	large SUV	5.49694	18.7312	375	683.521
135	34127	ICEV	small SUV	4.30141	31.0813	185	413.632
136	5934	HEV	small SUV	4.30141	39.4435	163	345.138
137	7738	PHEV	small SUV	4.30141	59.1456	163	234.316
138	19841	ICEV	Sedan	4.43166	22.2599	384.015	572.802
139	64926	HEV	small SUV	4.84888	92.1338	343.448	199.809
140	1496	PHEV	small SUV	4.37573	45.0762	163	298.718
141	9971	ICEV	small SUV	4.35715	26.0719	250	490.234
142	5251	ICEV	small SUV	4.70089	23.4046	245	546.452
143	38677	ICEV	large SUV	5.2676	21.3031	310	590.303
144	19815	ICEV	large SUV	4.05057	27.5844	155	452.33
145	43816	ICEV	large SUV	4.33857	25.8258	237	490.407
146	52312	ICEV	large SUV	5.56088	16.2691	438.206	774.974
147	2430	ICEV	large SUV	5.56424	23.4059	277	640.962
148	11314	ICEV	large SUV	4.47793	25.8258	237	488.533
149	27990	ICEV	large SUV	4.73368	23.0079	282.647	549.079
150	20810	ICEV	large SUV	4.81185	21.9954	300.185	574.636
151	63969	ICEV	large SUV	4.82549	24.0554	271.047	524.994
152	63888	ICEV	Pickup	5.38703	19.8081	295.604	634.206
153	76992	ICEV	large SUV	4.30327	27.8337	175	455.886
154	262463	ICEV	Pickup	6.52428	18.4433	343.828	677.841
155	34044	ICEV	Pickup	6.54095	24.5402	305	606.261
156	66530	ICEV	large SUV	5.9287	17.0137	364.088	742.896
157	4629	ICEV	large SUV	5.92857	23.3086	277	643.09
158	119310	ICEV	large SUV	5.34317	17.3306	365.853	727.128
159	6293	ICEV	large SUV	5.34311	23.3432	277	641.539
160	53407	ICEV	large SUV	4.1156	28.1385	155	445.41
161	179865	ICEV	large SUV	5.2676	21.5757	310	581.834
162	100041	ICEV	large SUV	4.70089	23.9318	271.122	528.552
163	20023	ICEV	Pickup	5.60741	19.1467	310	652.505
164	121052	ICEV	Pickup	6.51253	17.9506	368.097	698.633
165	38285	ICEV	Pickup	6.52442	24.1088	305	616.094
166	39206	ICEV	large SUV	4.29452	26.4265	175	478.712
167	98243	ICEV	large SUV	5.59925	16.8317	390.575	749.633
168	10011	ICEV	large SUV	5.63136	23.2751	277	643.959
169	34669	ICEV	small SUV	4.05057	30.467	143.416	418.352
170	25362	ICEV	small SUV	4.34327	27.499	237	470.223
171	8958	ICEV	Sedan	4.30682	25.6225	296.996	504.799
172	18367	ICEV	Sedan	4.7474	24.6683	313.71	528.231
173	3306	HEV	small SUV	5.20257	87.5284	362.94	223.771
174	14020	ICEV	small SUV	4.47793	27.0738	237	474.398
175	85503	HEV	Sedan	4.00332	114.048	201	158.13
176	32846	ICEV	Sedan	4.53642	21.9527	403.907	577.939
177	46856	ICEV	Sedan	4.41089	18.9625	512.934	654.116
178	72945	ICEV	small SUV	4.29487	28.3835	175	446.455
179	115966	ICEV	Sedan	4.51554	31.9112	163	403.826
180	76164	ICEV	small SUV	4.1156	30.9394	147.484	414.033
181	1063	HEV	Sedan	3.92051	66.3194	201	210.764
182	20737	ICEV	small SUV	4.3069	27.0859	175	466.77
183	19210	ICEV	large SUV	4.97031	21.3461	344.902	592.962
184	84853	ICEV	large SUV	4.97031	22.218	291	565.299
185	32934	ICEV	large SUV	4.94244	23.5398	239.173	534.613
186	97203	ICEV	large SUV	4.56614	24.174	218.982	520.187
187	24271	HEV	large SUV	4.57187	31.4589	177	420.312
188	5411	PHEV	large SUV	4.57083	46.1147	177	284.658
189	92212	ICEV	large SUV	4.472	26.1726	188	485.22
190	27337	HEV	large SUV	4.47087	36.7482	177	363.237
191	3388	PHEV	large SUV	4.46864	50.0593	177	266.927
192	1603	HEV	Sedan	4.91457	95.2405	365	191.314
193	988	HEV	small SUV	4.74735	88.9311	483	193.071
194	19515	ICEV	Sedan	4.53367	23.649	296.159	537.072
195	4803	ICEV	Sedan	4.92137	24.811	319.457	526.579
196	654	ICEV	Sedan	5.27689	21.7824	375	589.391
197	1245	HEV	Sedan	5.27689	20.7457	420	622.411
198	4587	HEV	Sedan	4.72876	89.5797	389.889	193.112
199	26824	ICEV	small SUV	4.75156	23.608	311.662	544.464
200	149037	ICEV	Sedan	4.31541	34.7983	155.18	371.254
201	33147	HEV	Sedan	4.33694	52.2581	104	265.453
202	35072	HEV	small SUV	4.92617	101.513	296.764	177.702
203	11777	HEV	Sedan	4.82321	109.702	267.539	168.791
204	74727	ICEV	small SUV	4.08082	31.4688	158.318	408.831
205	11007	HEV	small SUV	4.07844	116.464	201	151.373
206	64130	ICEV	small SUV	4.56689	26.1051	213.875	492.128
207	55833	ICEV	Sedan	4.61568	32.2236	195.447	401.021
208	17883	HEV	Sedan	4.64083	48.9975	150	281.965
209	54742	ICEV	small SUV	4.47241	28.8215	188	444.665
210	35369	ICEV	Sedan	3.87974	31.0556	121	408.536
211	229	ICEV	large SUV	4.37602	23.174	249	544.318
212	5131	ICEV	large SUV	4.74261	23.506	298.996	544.451
213	756	HEV	large SUV	4.73806	22.7426	400	559.844
214	227	HEV	large SUV	4.8966	79.3313	394	188.217
215	10102	ICEV	large SUV	5.03305	17.9468	443.172	700.849
216	20395	HEV	large SUV	5.07292	20.0799	400	634.032
217	7570	ICEV	large SUV	4.59046	21.1607	282.711	593.025
218	2564	HEV	large SUV	4.95546	22.4587	360	572.398
219	24387	ICEV	large SUV	4.93766	20.2837	418.791	633.361
220	23805	HEV	large SUV	5.08494	22.2178	305.129	581.659
221	488	PHEV	large SUV	5.10038	36.789	440	347.676
222	1433	ICEV	Sedan	4.2058	19.7971	486.462	630.808
223	385	ICEV	Sedan	4.74237	27.493	285.195	469.341
224	25905	ICEV	Van	5.39444	23.0035	290	550.805
225	33915	ICEV	large SUV	4.1228	29.0962	153.319	433.806
226	80873	ICEV	large SUV	4.63386	25.3974	244.225	499.183
227	24499	HEV	large SUV	4.64825	34.3561	177	387.169
228	4231	PHEV	large SUV	4.64515	47.9318	177	273.942
229	93591	ICEV	large SUV	4.4716	25.3299	188	498.948
230	47558	HEV	large SUV	4.47163	38.0883	177	351.75
231	9102	PHEV	large SUV	4.46864	51.1561	177	261.672
232	80450	ICEV	large SUV	4.97031	21.7007	291	576
233	19390	HEV	Sedan	4.74099	103.216	304.19	178.07
234	155457	ICEV	Sedan	4.20434	34.1903	152.769	376.689
235	60336	ICEV	Sedan	4.62617	31.5537	189.223	410.014
236	25014	HEV	Sedan	4.31773	51.1077	104	275.558
237	11447	HEV	Sedan	4.28283	110.421	201	156.355
238	4414	PHEV	Sedan	4.32044	67.968	104	205.567
239	40087	ICEV	Sedan	3.93909	37.639	120	342.993
240	14663	ICEV	small SUV	4.1156	32.7203	147	390.258
241	80242	ICEV	Sedan	4.09783	31.2878	147	404.238
242	71797	ICEV	small SUV	4.47046	28.7898	188	450.613
243	2283	HEV	small SUV	4.47793	43.4022	177	321.981
244	8651	ICEV	Sedan	4.68623	23.1388	335.065	551.797
245	6745	HEV	Sedan	4.9419	129.579	655.105	189.053
246	73214	ICEV	large SUV	4.14348	29.6588	194.911	429.227
247	153966	ICEV	large SUV	4.30141	26.9942	190.893	468.008
248	26690	ICEV	large SUV	4.84954	23.3757	227	540.163
249	49156	ICEV	large SUV	4.66251	26.9673	202.083	470.608
250	29098	ICEV	Sedan	4.29212	31.2537	196.136	412.408
251	100	HEV	Sedan	4.14348	90.1544	143	158.497
252	9381	ICEV	Sedan	3.45599	30.8074	181	406.599
253	79	ICEV	Sedan	4.35715	18.1147	710	670.783
254	725	PHEV	Sedan	4.30141	22.1973	577	529.347
255	355	ICEV	Sedan	4.38502	18.4646	612	659.098
256	7275	ICEV	large SUV	4.7867	14.0175	508.063	881.506
257	7508	ICEV	large SUV	4.6673	22.9333	278.34	555.053
258	18830	HEV	large SUV	5.04264	20.4821	415.117	625.064
259	16078	HEV	large SUV	5.34847	20.1058	401.677	642.544
260	14587	HEV	large SUV	5.36294	79.2675	425.274	222.987
261	8788	ICEV	large SUV	4.32694	27.5897	221	460.912
262	11780	ICEV	large SUV	4.49411	25.6977	221	490.685
263	18074	HEV	large SUV	4.70127	27.0542	255	480.071
264	18391	ICEV	large SUV	5.07248	21.6226	255	586.144
265	27812	ICEV	Van	5.34297	21.6304	208	579.737
266	29003	HEV	Sedan	4.53342	28.772	267.99	457.156
267	4776	ICEV	Sedan	4.4494	25.0752	294.625	515.656
268	12218	ICEV	Sedan	4.36533	29.087	234.762	444.239
269	11404	HEV	Sedan	4.61641	25.6171	369.802	507.065
270	10715	ICEV	Sedan	4.70385	25.6632	270.817	499.458
271	5589	HEV	Sedan	5.09073	87.0722	349.847	219.496
272	8748	HEV	Sedan	5.32619	94.0539	427.726	220.921
273	1415	ICEV	Sedan	4.37573	24.2914	339.032	523.802
274	936	ICEV	Sedan	4.53703	23.5475	302	543.554
275	1442	HEV	Sedan	4.89381	21.7385	429	590.594
276	411	ICEV	Sedan	4.88112	17.4751	605.757	715.64
277	14326	HEV	Sedan	5.25262	22.205	462.616	581.327
278	1717	ICEV	Sedan	4.73507	16.0234	545.743	770.579
279	1572	HEV	Sedan	4.76593	26.2453	362	495.019
280	15266	HEV	small SUV	4.49555	99.4886	214.903	183.069
281	13377	HEV	small SUV	5.0039	84.3452	305.862	221.991
282	7006	ICEV	small SUV	4.33871	29.1551	221	444.98
283	8124	ICEV	small SUV	4.50044	28.1558	221	458.562
284	5253	HEV	small SUV	4.69405	29.135	255	458.235
285	493	PHEV	Sedan	5.32653	41.7104	362	325.025
286	13460	ICEV	large SUV	4.10631	25.7671	152	488.596
287	8060	PHEV	large SUV	4.3107	36.7691	131	350.207
288	56084	ICEV	large SUV	4.25913	27.3725	171.983	460.402
289	36	ICEV	small SUV	4.12489	26.5778	152	474.645
290	11585	ICEV	Sedan	3.58657	39.9354	78	320.296
291	282	ICEV	small SUV	4.06915	27.5082	148	458.275
292	6227	ICEV	large SUV	4.57083	25.061	268	504.608
293	8656	ICEV	large SUV	4.54296	25.061	268	505.054
294	29914	ICEV	large SUV	4.93315	22.7952	295	557.385
295	10811	ICEV	large SUV	5.28618	16.3403	400	769.35
296	22557	ICEV	large SUV	5.28618	15.9521	400	784.926
297	69822	ICEV	Pickup	5.04729	20.4363	310	616.486
298	69400	ICEV	large SUV	4.93052	23.0603	285.558	554.366
299	216331	ICEV	large SUV	4.29212	31.4858	201	412.923
300	16700	ICEV	Pickup	6.13228	17.9903	400	702.166
301	7504	ICEV	Sedan	4.43165	23.6163	317.484	535.152
302	5447	ICEV	small SUV	4.57083	26.0751	268	490.182
303	117225	ICEV	Sedan	4.52461	32.8388	188.518	394.036
304	20272	HEV	Sedan	4.55061	94.5003	307.13	189.492
305	200	ICEV	Sedan	4.43315	19.1585	565	644.653
306	72460	ICEV	Sedan	3.99483	34.3504	122	374.076
307	11211	HEV	Sedan	4.1667	107.356	181.503	149.439
308	11816	ICEV	Sedan	4.4036	24.8839	300	510.665
309	37681	ICEV	Sedan	4.63586	24.0396	260	530.319
310	157649	ICEV	small SUV	4.29212	33.4813	201	395.844
311	82760	ICEV	Sedan	4.28435	34.4134	149	377.934
312	21832	ICEV	Sedan	3.97965	36.7538	122	353.032
313	1760	ICEV	Sedan	3.98395	22.4259	400	560.974
314	4	ICEV	Sedan	4.62657	12.2027	791	969.165
315	26343	HEV	large SUV	5.31405	67.539	818.104	249.367
316	12808	HEV	Pickup	5.96438	69.9574	761.315	252.711
317	60306	ICEV	large SUV	4.71947	22.1364	260	569.617
318	117789	ICEV	large SUV	4.13419	30.714	168.705	414.185
319	1980	PHEV	large SUV	4.15277	44.0996	137	297.011
320	141453	ICEV	large SUV	4.17596	29.4234	182	433.728
321	117070	ICEV	large SUV	4.34932	27.7393	211.825	459.385
322	11158	HEV	large SUV	4.57083	100.402	215	161.95
323	5995	ICEV	Sedan	3.94838	23.9731	228	515.692
324	27359	ICEV	Sedan	4.1156	32.3193	152	400.728
325	15796	ICEV	Sedan	4.38502	30.9303	193.836	423.907
326	20837	ICEV	Sedan	4.18064	22.6321	271	548.708
327	6993	HEV	large SUV	5.10967	100.698	658.052	181.504
328	62807	HEV	large SUV	4.74735	120.832	425	152.861
329	266092	HEV	Sedan	4.57083	128.141	297.88	143.791
330	18924	HEV	Sedan	5.05393	114.821	779.602	177.998
331	31316	HEV	small SUV	5.10967	99.0205	761.666	198.671
332	403588	HEV	small SUV	4.7488	118.973	426.562	166.319
333	43057	ICEV	large SUV	4.42218	16.7423	301	741.967
334	6586	ICEV	large SUV	4.77522	19.1371	409	664.925
335	13680	ICEV	large SUV	4.34786	25.8989	271.784	487.552
336	7236	HEV	large SUV	4.34786	39.0325	189	349.175
337	1260	PHEV	large SUV	4.34786	51.687	181	257.044
338	32413	ICEV	large SUV	4.72876	24.782	275	512.49
339	25809	HEV	large SUV	4.73171	33.1717	213.607	405.585
340	7341	HEV	large SUV	4.61728	98.5034	308	169.074
341	142433	ICEV	large SUV	4.47793	17.4943	270	705.82
342	8261	HEV	large SUV	4.57083	100.359	214	162.51
343	27239	ICEV	large SUV	4.11737	30.4185	169	418.469
344	12994	HEV	large SUV	4.12243	40.724	150	325.847
345	141096	ICEV	large SUV	4.73806	25.2796	264	503.154
346	56841	HEV	large SUV	4.73806	35.0243	186	382.698
347	120350	ICEV	large SUV	4.32656	30.5101	203	418.904
348	134419	HEV	large SUV	4.32928	39.2102	176	339.536
349	25666	PHEV	large SUV	4.31389	58.7335	177	230.749
350	19937	HEV	large SUV	5.40696	20.8711	389	623.182
351	67840	HEV	Van	5.29707	35.661	189	383.876
352	298434	ICEV	Pickup	5.26279	20.5877	266.256	604.131
353	86550	ICEV	Pickup	6.51186	20.0332	387.849	639.804
354	26728	HEV	Pickup	6.50481	20.443	389	636.239
355	31128	HEV	large SUV	4.32928	38.1494	176	350.651
356	3239	ICEV	Sedan	3.9298	25.0626	370.472	504.139
357	21819	ICEV	Sedan	4.60298	27.1071	294.498	474.235
358	10052	HEV	Sedan	4.60799	43.6189	176	318.281
359	25278	ICEV	Sedan	4.40678	23.6978	314.85	535.073
360	1224	ICEV	Sedan	4.6916	19.3401	471	646.705
361	21	HEV	Sedan	4.6916	29.8657	295	443.619
362	2199	ICEV	Sedan	5.09109	22.6933	416	569.533
363	124	HEV	Sedan	5.09109	25.3117	295	525.717
364	6934	ICEV	small SUV	4.34786	28.2398	226.405	459.494
365	346	PHEV	small SUV	4.34786	51.687	181	265.818
366	1576	ICEV	Sedan	4.33588	23.5545	310.675	537.528
367	30148	ICEV	small SUV	4.72876	25.9462	275	499.062
368	9199	HEV	Sedan	4.08773	40.6961	143	337.015
369	4606	HEV	small SUV	4.57083	113.864	201	166.166
370	276120	ICEV	Sedan	4.483	32.5594	208.74	398.114
371	32304	HEV	Sedan	4.49311	47.7727	176	292.431
372	147720	ICEV	Sedan	4.12072	36.1088	173.493	361.81
373	31325	ICEV	small SUV	4.14354	32.4755	169	400.184
374	39262	HEV	Sedan	4.14348	47.7468	97	288.916
375	16212	ICEV	Sedan	3.94838	24.4075	228	507.578
376	21310	HEV	Sedan	4.3107	53.1222	150	266.062
377	5563	PHEV	Sedan	4.3107	81.2664	150	185.619
378	112207	ICEV	small SUV	4.32827	31.5263	203	406.918
379	19610	HEV	Sedan	4.57473	39.9971	195.207	345.152
380	16888	ICEV	large SUV	4.85043	18.9781	377.465	660.218
381	1576	PHEV	large SUV	4.84862	26.05	380.749	480.743
382	26775	ICEV	large SUV	4.64316	21.3555	296.211	589.586
383	3882	HEV	large SUV	4.83296	76.9789	364.436	207.226
384	18772	ICEV	large SUV	4.20851	24.6956	226.411	508.346
385	7050	HEV	large SUV	4.33857	92.1373	308	177.591
386	67486	HEV	large SUV	4.54296	25.6628	248.999	497.157
387	4125	PHEV	large SUV	4.55225	36.6305	248	344.908
388	16710	HEV	large SUV	5.03751	19.9669	335	628.056
389	10398	ICEV	large SUV	5.03751	22.1461	261	573.013
390	12554	HEV	large SUV	5.06322	20.5621	335	618.231
391	1072	HEV	large SUV	5.0818	16.4205	591	761.434
392	7865	ICEV	large SUV	4.56154	21.6432	349	578.37
393	1679	ICEV	large SUV	4.99818	17.3327	500	719.269
394	3117	ICEV	large SUV	5.06322	17.3327	500	719.269
395	1762	ICEV	large SUV	5.20951	17.3142	551.964	727.949
396	124	PHEV	large SUV	5.0818	28.227	456	444.885
397	674	ICEV	large SUV	5.10967	16.4256	657	754.816
398	62753	ICEV	large SUV	5.09109	21.1248	266.654	593.55
399	25638	HEV	large SUV	4.33857	97.2291	308	172.286
400	6081	ICEV	large SUV	4.18064	28.9017	158	437.254
401	71600	ICEV	large SUV	4.45185	26.6359	184	478.266
402	7	HEV	Sedan	4.66373	53.4834	1914	281.278
403	3938	ICEV	Sedan	3.80426	20.2253	406.972	615.375
404	9034	ICEV	Sedan	3.8674	19.2613	485.886	645.284
405	5205	ICEV	Sedan	4.87212	20.5714	365.06	615.358
406	887	PHEV	Sedan	4.87971	27.8333	341.636	463.972
407	6460	HEV	Sedan	4.92608	81.9142	510.387	216.781
408	10455	HEV	Sedan	4.0227	32.3478	201	400.228
409	15245	HEV	Sedan	4.40045	28.0618	249.437	460.042
410	17681	HEV	Sedan	4.43675	28.0513	251.247	460.115
411	7160	HEV	Sedan	4.73261	26.7702	287.375	486.982
412	962	HEV	Sedan	4.78451	25.4742	335	507.704
413	1472	HEV	Sedan	5.09109	23.2665	335	556.705
414	2267	HEV	Sedan	4.8867	81.9568	522	208.947
415	2909	HEV	small SUV	4.34786	100.982	201	184.963
416	1068	ICEV	Sedan	4.3107	17.3476	580.427	707.914
417	1517	HEV	Sedan	4.86812	17.3225	591	721.25
418	716	HEV	Sedan	4.8867	80.8577	637	213.555
419	867	ICEV	Sedan	4.10631	24.175	401	523.811
420	1614	ICEV	Sedan	4.48319	21.4593	444	588.021
421	1818	ICEV	Sedan	4.03199	27.5047	306	467.941
422	1625	ICEV	Sedan	4.39431	25.1838	349	505.325
423	5651	ICEV	Sedan	4.40363	25.0138	349	509.94
424	312	HEV	Sedan	4.71947	22.6565	444	569.616
425	236	HEV	Sedan	4.7938	22.6565	444	569.616
426	771	HEV	Sedan	5.06322	18.516	563	687.177
427	421	ICEV	Sedan	3.90193	26.1273	228	481.884
428	421	ICEV	Sedan	3.89264	27.0112	288	467.909
429	1449	ICEV	Sedan	4.74735	17.5484	565.71	725.487
430	507	ICEV	Sedan	5.32334	17.3235	573.314	734.367
431	91	PHEV	Sedan	5.32334	25.8661	542	495.115
432	33	ICEV	Sedan	4.62657	9.52539	1548.48	1245.41
433	1408	ICEV	Sedan	4.32555	15.4826	606.196	780.952
434	777	ICEV	Sedan	5.10967	16.4256	657	763.876
435	3797	ICEV	Sedan	4.49651	26.6337	300	481.458
436	6920	ICEV	small SUV	5.09109	21.9991	258.913	576.95
437	2615	ICEV	Sedan	4.12489	31.0528	228	414.151
438	2602	ICEV	Sedan	4.0227	25.4258	315	494.811
439	6802	ICEV	Sedan	4.0227	28.4354	241	447.339
440	23969	HEV	small SUV	4.34786	104.93	201	176.901
441	35146	ICEV	Sedan	4.12489	35.6892	158	364.84
442	49747	ICEV	small SUV	4.18064	31.3999	158	412.651
443	1319	HEV	Van	4.69674	27.1559	247	473.755
444	492	HEV	Van	4.84025	26.1538	295	489.497
445	16599	HEV	large SUV	4.34786	26.7185	247	476.931
446	23028	HEV	large SUV	4.72744	25.7542	251.773	497.504
447	7147	PHEV	large SUV	4.72795	41.1575	312	313.01
448	24332	HEV	large SUV	4.98934	23.6464	282.201	542.316
449	9832	PHEV	large SUV	4.99309	40.3343	312	324.491
450	9499	HEV	Sedan	4.36655	101.529	357.433	183.845
451	8261	HEV	small SUV	4.3319	85.8292	402	195.07
452	2722	ICEV	Sedan	4.58941	29.9213	247	435.493
453	1680	PHEV	Sedan	4.58941	49.3616	312	271.763
454	1540	HEV	Sedan	4.94244	27.5485	295	474.697
455	74	PHEV	Sedan	4.94244	45.071	312	298.275
456	321	PHEV	Sedan	4.58941	49.3616	312	271.763
457	2072	HEV	small SUV	4.34786	27.9986	194	464.025
458	8324	HEV	small SUV	4.33229	83.8855	402	196.986
459	6217	HEV	small SUV	4.7283	26.7627	247	480.41

## Sheet: Figure 3 - Phases
	Materials	Battery	Assembly and Logistics	Operation - Fuel Cycle	Operation - Electricity	Service and Decomissioning	Total
ICEV	44.7059	0	7.74137	459.511	0	9.24818	521.206
HEV	47.7168	0.391161	7.93465	379.582	0	9.33134	444.956
PHEV	50.395	6.7901	8.34741	218.802	54.8542	9.49555	348.685
HEV	47.7386	37.7578	8.85259	0	69.4673	9.28796	173.104

## Sheet: Figure 4 - Scenarios
	Base Case				KY grid mix				VT grid mix				Long-Run Marginal Emission Factors				25% battery replacement				ND temperature				10 year operating life				Combined worst case
Vehicle #	ICEV	HEV	PHEV	HEV	ICEV	HEV	PHEV	HEV	ICEV	HEV	PHEV	HEV	ICEV	HEV	PHEV	HEV	ICEV	HEV	PHEV	HEV	ICEV	HEV	PHEV	HEV	ICEV	HEV	PHEV	HEV	ICEV	HEV	PHEV	HEV
1	578.995	#N/A	#N/A	#N/A	579.026	#N/A	#N/A	#N/A	578.949	#N/A	#N/A	#N/A	579.015	#N/A	#N/A	#N/A	578.995	#N/A	#N/A	#N/A	638.943	#N/A	#N/A	#N/A	606.15	#N/A	#N/A	#N/A	666.152	#N/A	#N/A	#N/A
2	517.685	#N/A	#N/A	#N/A	517.716	#N/A	#N/A	#N/A	517.639	#N/A	#N/A	#N/A	517.704	#N/A	#N/A	#N/A	517.685	#N/A	#N/A	#N/A	571.602	#N/A	#N/A	#N/A	540.029	#N/A	#N/A	#N/A	594	#N/A	#N/A	#N/A
3	434.586	#N/A	#N/A	#N/A	434.617	#N/A	#N/A	#N/A	434.54	#N/A	#N/A	#N/A	434.605	#N/A	#N/A	#N/A	434.586	#N/A	#N/A	#N/A	478.143	#N/A	#N/A	#N/A	459.821	#N/A	#N/A	#N/A	503.432	#N/A	#N/A	#N/A
4	#N/A	359.563	#N/A	#N/A	#N/A	359.594	#N/A	#N/A	#N/A	359.516	#N/A	#N/A	#N/A	359.582	#N/A	#N/A	#N/A	359.67	#N/A	#N/A	#N/A	424.192	#N/A	#N/A	#N/A	384.909	#N/A	#N/A	#N/A	449.753	#N/A	#N/A
5	534.072	#N/A	#N/A	#N/A	534.103	#N/A	#N/A	#N/A	534.025	#N/A	#N/A	#N/A	534.091	#N/A	#N/A	#N/A	534.072	#N/A	#N/A	#N/A	589.185	#N/A	#N/A	#N/A	559.493	#N/A	#N/A	#N/A	614.66	#N/A	#N/A	#N/A
6	568.311	#N/A	#N/A	#N/A	568.342	#N/A	#N/A	#N/A	568.265	#N/A	#N/A	#N/A	568.331	#N/A	#N/A	#N/A	568.311	#N/A	#N/A	#N/A	627.241	#N/A	#N/A	#N/A	594.488	#N/A	#N/A	#N/A	653.471	#N/A	#N/A	#N/A
7	569.663	#N/A	#N/A	#N/A	569.694	#N/A	#N/A	#N/A	569.616	#N/A	#N/A	#N/A	569.682	#N/A	#N/A	#N/A	569.663	#N/A	#N/A	#N/A	628.658	#N/A	#N/A	#N/A	596.234	#N/A	#N/A	#N/A	655.283	#N/A	#N/A	#N/A
8	592.492	#N/A	#N/A	#N/A	592.523	#N/A	#N/A	#N/A	592.446	#N/A	#N/A	#N/A	592.511	#N/A	#N/A	#N/A	592.492	#N/A	#N/A	#N/A	654.571	#N/A	#N/A	#N/A	617.249	#N/A	#N/A	#N/A	679.382	#N/A	#N/A	#N/A
9	396.046	#N/A	#N/A	#N/A	396.077	#N/A	#N/A	#N/A	396	#N/A	#N/A	#N/A	396.066	#N/A	#N/A	#N/A	396.046	#N/A	#N/A	#N/A	435.826	#N/A	#N/A	#N/A	418.668	#N/A	#N/A	#N/A	458.502	#N/A	#N/A	#N/A
10	504.605	#N/A	#N/A	#N/A	504.636	#N/A	#N/A	#N/A	504.559	#N/A	#N/A	#N/A	504.624	#N/A	#N/A	#N/A	504.605	#N/A	#N/A	#N/A	556.517	#N/A	#N/A	#N/A	529.301	#N/A	#N/A	#N/A	581.267	#N/A	#N/A	#N/A
11	517.37	#N/A	#N/A	#N/A	517.401	#N/A	#N/A	#N/A	517.324	#N/A	#N/A	#N/A	517.389	#N/A	#N/A	#N/A	517.37	#N/A	#N/A	#N/A	570.207	#N/A	#N/A	#N/A	544.292	#N/A	#N/A	#N/A	597.183	#N/A	#N/A	#N/A
12	395.002	#N/A	#N/A	#N/A	395.033	#N/A	#N/A	#N/A	394.956	#N/A	#N/A	#N/A	395.022	#N/A	#N/A	#N/A	395.002	#N/A	#N/A	#N/A	434.33	#N/A	#N/A	#N/A	418.931	#N/A	#N/A	#N/A	458.312	#N/A	#N/A	#N/A
13	#N/A	315.06	#N/A	#N/A	#N/A	315.091	#N/A	#N/A	#N/A	315.014	#N/A	#N/A	#N/A	315.079	#N/A	#N/A	#N/A	315.18	#N/A	#N/A	#N/A	370.399	#N/A	#N/A	#N/A	339.867	#N/A	#N/A	#N/A	395.436	#N/A	#N/A
14	374.417	#N/A	#N/A	#N/A	374.448	#N/A	#N/A	#N/A	374.371	#N/A	#N/A	#N/A	374.436	#N/A	#N/A	#N/A	374.417	#N/A	#N/A	#N/A	411.976	#N/A	#N/A	#N/A	395.846	#N/A	#N/A	#N/A	433.46	#N/A	#N/A	#N/A
15	417.665	#N/A	#N/A	#N/A	417.696	#N/A	#N/A	#N/A	417.618	#N/A	#N/A	#N/A	417.684	#N/A	#N/A	#N/A	417.665	#N/A	#N/A	#N/A	458.898	#N/A	#N/A	#N/A	444.502	#N/A	#N/A	#N/A	485.79	#N/A	#N/A	#N/A
16	#N/A	352.705	#N/A	#N/A	#N/A	352.736	#N/A	#N/A	#N/A	352.659	#N/A	#N/A	#N/A	352.725	#N/A	#N/A	#N/A	352.831	#N/A	#N/A	#N/A	414.439	#N/A	#N/A	#N/A	381.258	#N/A	#N/A	#N/A	443.229	#N/A	#N/A
17	445.318	#N/A	#N/A	#N/A	445.349	#N/A	#N/A	#N/A	445.272	#N/A	#N/A	#N/A	445.337	#N/A	#N/A	#N/A	445.318	#N/A	#N/A	#N/A	490.529	#N/A	#N/A	#N/A	469.179	#N/A	#N/A	#N/A	514.443	#N/A	#N/A	#N/A
18	725.253	#N/A	#N/A	#N/A	725.284	#N/A	#N/A	#N/A	725.206	#N/A	#N/A	#N/A	725.272	#N/A	#N/A	#N/A	725.253	#N/A	#N/A	#N/A	801	#N/A	#N/A	#N/A	757.803	#N/A	#N/A	#N/A	833.604	#N/A	#N/A	#N/A
19	609.821	#N/A	#N/A	#N/A	609.852	#N/A	#N/A	#N/A	609.775	#N/A	#N/A	#N/A	609.84	#N/A	#N/A	#N/A	609.821	#N/A	#N/A	#N/A	672.789	#N/A	#N/A	#N/A	639.305	#N/A	#N/A	#N/A	702.326	#N/A	#N/A	#N/A
20	693.96	#N/A	#N/A	#N/A	693.991	#N/A	#N/A	#N/A	693.913	#N/A	#N/A	#N/A	693.979	#N/A	#N/A	#N/A	693.96	#N/A	#N/A	#N/A	766.737	#N/A	#N/A	#N/A	723.443	#N/A	#N/A	#N/A	796.275	#N/A	#N/A	#N/A
21	616.87	#N/A	#N/A	#N/A	616.901	#N/A	#N/A	#N/A	616.823	#N/A	#N/A	#N/A	616.889	#N/A	#N/A	#N/A	616.87	#N/A	#N/A	#N/A	681.329	#N/A	#N/A	#N/A	643.708	#N/A	#N/A	#N/A	708.221	#N/A	#N/A	#N/A
22	#N/A	713.533	#N/A	#N/A	#N/A	713.564	#N/A	#N/A	#N/A	713.487	#N/A	#N/A	#N/A	713.553	#N/A	#N/A	#N/A	713.579	#N/A	#N/A	#N/A	848.969	#N/A	#N/A	#N/A	752.488	#N/A	#N/A	#N/A	888.046	#N/A	#N/A
23	#N/A	#N/A	#N/A	201.672	#N/A	#N/A	#N/A	317.839	#N/A	#N/A	#N/A	114.769	#N/A	#N/A	#N/A	242.916	#N/A	#N/A	#N/A	209.933	#N/A	#N/A	#N/A	234.484	#N/A	#N/A	#N/A	271.714	#N/A	#N/A	#N/A	486.712
24	440.735	#N/A	#N/A	#N/A	440.766	#N/A	#N/A	#N/A	440.688	#N/A	#N/A	#N/A	440.754	#N/A	#N/A	#N/A	440.735	#N/A	#N/A	#N/A	485.53	#N/A	#N/A	#N/A	463.724	#N/A	#N/A	#N/A	508.573	#N/A	#N/A	#N/A
25	517.958	#N/A	#N/A	#N/A	517.989	#N/A	#N/A	#N/A	517.912	#N/A	#N/A	#N/A	517.978	#N/A	#N/A	#N/A	517.958	#N/A	#N/A	#N/A	570.911	#N/A	#N/A	#N/A	544.591	#N/A	#N/A	#N/A	597.598	#N/A	#N/A	#N/A
26	#N/A	523.791	#N/A	#N/A	#N/A	523.822	#N/A	#N/A	#N/A	523.745	#N/A	#N/A	#N/A	523.81	#N/A	#N/A	#N/A	523.834	#N/A	#N/A	#N/A	623.471	#N/A	#N/A	#N/A	550.354	#N/A	#N/A	#N/A	650.154	#N/A	#N/A
27	532.424	#N/A	#N/A	#N/A	532.455	#N/A	#N/A	#N/A	532.378	#N/A	#N/A	#N/A	532.443	#N/A	#N/A	#N/A	532.424	#N/A	#N/A	#N/A	587.09	#N/A	#N/A	#N/A	558.942	#N/A	#N/A	#N/A	613.662	#N/A	#N/A	#N/A
28	#N/A	523.074	#N/A	#N/A	#N/A	523.105	#N/A	#N/A	#N/A	523.028	#N/A	#N/A	#N/A	523.094	#N/A	#N/A	#N/A	523.118	#N/A	#N/A	#N/A	622.755	#N/A	#N/A	#N/A	549.277	#N/A	#N/A	#N/A	649.077	#N/A	#N/A
29	703.369	#N/A	#N/A	#N/A	703.4	#N/A	#N/A	#N/A	703.323	#N/A	#N/A	#N/A	703.388	#N/A	#N/A	#N/A	703.369	#N/A	#N/A	#N/A	776.055	#N/A	#N/A	#N/A	738.113	#N/A	#N/A	#N/A	810.853	#N/A	#N/A	#N/A
30	#N/A	549.105	#N/A	#N/A	#N/A	549.136	#N/A	#N/A	#N/A	549.058	#N/A	#N/A	#N/A	549.124	#N/A	#N/A	#N/A	549.148	#N/A	#N/A	#N/A	652.486	#N/A	#N/A	#N/A	579.797	#N/A	#N/A	#N/A	683.299	#N/A	#N/A
31	#N/A	#N/A	413.394	#N/A	#N/A	#N/A	512.444	#N/A	#N/A	#N/A	339.323	#N/A	#N/A	#N/A	448.554	#N/A	#N/A	#N/A	415.743	#N/A	#N/A	#N/A	498.221	#N/A	#N/A	#N/A	470.808	#N/A	#N/A	#N/A	690.364	#N/A
32	713.592	#N/A	#N/A	#N/A	713.623	#N/A	#N/A	#N/A	713.546	#N/A	#N/A	#N/A	713.612	#N/A	#N/A	#N/A	713.592	#N/A	#N/A	#N/A	787.98	#N/A	#N/A	#N/A	746.143	#N/A	#N/A	#N/A	820.584	#N/A	#N/A	#N/A
33	#N/A	546.249	#N/A	#N/A	#N/A	546.28	#N/A	#N/A	#N/A	546.203	#N/A	#N/A	#N/A	546.269	#N/A	#N/A	#N/A	546.293	#N/A	#N/A	#N/A	649.575	#N/A	#N/A	#N/A	575.64	#N/A	#N/A	#N/A	679.085	#N/A	#N/A
34	#N/A	573.017	#N/A	#N/A	#N/A	573.048	#N/A	#N/A	#N/A	572.97	#N/A	#N/A	#N/A	573.036	#N/A	#N/A	#N/A	573.062	#N/A	#N/A	#N/A	680.111	#N/A	#N/A	#N/A	607.109	#N/A	#N/A	#N/A	714.326	#N/A	#N/A
35	#N/A	#N/A	513.212	#N/A	#N/A	#N/A	637.225	#N/A	#N/A	#N/A	420.498	#N/A	#N/A	#N/A	557.227	#N/A	#N/A	#N/A	516.081	#N/A	#N/A	#N/A	623.178	#N/A	#N/A	#N/A	577.351	#N/A	#N/A	#N/A	856.078	#N/A
36	445.792	#N/A	#N/A	#N/A	445.823	#N/A	#N/A	#N/A	445.746	#N/A	#N/A	#N/A	445.812	#N/A	#N/A	#N/A	445.792	#N/A	#N/A	#N/A	490.905	#N/A	#N/A	#N/A	470.258	#N/A	#N/A	#N/A	515.425	#N/A	#N/A	#N/A
37	443.758	#N/A	#N/A	#N/A	443.789	#N/A	#N/A	#N/A	443.711	#N/A	#N/A	#N/A	443.777	#N/A	#N/A	#N/A	443.758	#N/A	#N/A	#N/A	488.232	#N/A	#N/A	#N/A	469.811	#N/A	#N/A	#N/A	514.339	#N/A	#N/A	#N/A
38	#N/A	#N/A	348.492	#N/A	#N/A	#N/A	415.171	#N/A	#N/A	#N/A	298.771	#N/A	#N/A	#N/A	372.008	#N/A	#N/A	#N/A	349.866	#N/A	#N/A	#N/A	419.55	#N/A	#N/A	#N/A	392.385	#N/A	#N/A	#N/A	551.538	#N/A
39	445.165	#N/A	#N/A	#N/A	445.196	#N/A	#N/A	#N/A	445.118	#N/A	#N/A	#N/A	445.184	#N/A	#N/A	#N/A	445.165	#N/A	#N/A	#N/A	489.803	#N/A	#N/A	#N/A	471.217	#N/A	#N/A	#N/A	515.91	#N/A	#N/A	#N/A
40	444.819	#N/A	#N/A	#N/A	444.85	#N/A	#N/A	#N/A	444.773	#N/A	#N/A	#N/A	444.838	#N/A	#N/A	#N/A	444.819	#N/A	#N/A	#N/A	489.417	#N/A	#N/A	#N/A	470.872	#N/A	#N/A	#N/A	515.524	#N/A	#N/A	#N/A
41	#N/A	#N/A	371.483	#N/A	#N/A	#N/A	433.276	#N/A	#N/A	#N/A	325.401	#N/A	#N/A	#N/A	393.276	#N/A	#N/A	#N/A	372.856	#N/A	#N/A	#N/A	450.047	#N/A	#N/A	#N/A	412.213	#N/A	#N/A	#N/A	572.548	#N/A
42	445.133	#N/A	#N/A	#N/A	445.164	#N/A	#N/A	#N/A	445.087	#N/A	#N/A	#N/A	445.153	#N/A	#N/A	#N/A	445.133	#N/A	#N/A	#N/A	489.768	#N/A	#N/A	#N/A	471.186	#N/A	#N/A	#N/A	515.875	#N/A	#N/A	#N/A
43	#N/A	476.857	#N/A	#N/A	#N/A	476.888	#N/A	#N/A	#N/A	476.811	#N/A	#N/A	#N/A	476.876	#N/A	#N/A	#N/A	476.908	#N/A	#N/A	#N/A	565.813	#N/A	#N/A	#N/A	504.713	#N/A	#N/A	#N/A	593.798	#N/A	#N/A
44	#N/A	464.847	#N/A	#N/A	#N/A	464.878	#N/A	#N/A	#N/A	464.801	#N/A	#N/A	#N/A	464.866	#N/A	#N/A	#N/A	464.9	#N/A	#N/A	#N/A	548.827	#N/A	#N/A	#N/A	497.755	#N/A	#N/A	#N/A	581.867	#N/A	#N/A
45	#N/A	592.476	#N/A	#N/A	#N/A	592.507	#N/A	#N/A	#N/A	592.429	#N/A	#N/A	#N/A	592.495	#N/A	#N/A	#N/A	592.529	#N/A	#N/A	#N/A	702.491	#N/A	#N/A	#N/A	628.815	#N/A	#N/A	#N/A	738.962	#N/A	#N/A
46	503.285	#N/A	#N/A	#N/A	503.316	#N/A	#N/A	#N/A	503.239	#N/A	#N/A	#N/A	503.305	#N/A	#N/A	#N/A	503.285	#N/A	#N/A	#N/A	554.048	#N/A	#N/A	#N/A	531.915	#N/A	#N/A	#N/A	582.732	#N/A	#N/A	#N/A
47	634.619	#N/A	#N/A	#N/A	634.65	#N/A	#N/A	#N/A	634.572	#N/A	#N/A	#N/A	634.638	#N/A	#N/A	#N/A	634.619	#N/A	#N/A	#N/A	699.61	#N/A	#N/A	#N/A	667.533	#N/A	#N/A	#N/A	732.578	#N/A	#N/A	#N/A
48	#N/A	#N/A	#N/A	182.724	#N/A	#N/A	#N/A	279.189	#N/A	#N/A	#N/A	110.768	#N/A	#N/A	#N/A	216.748	#N/A	#N/A	#N/A	192.311	#N/A	#N/A	#N/A	209.528	#N/A	#N/A	#N/A	244.262	#N/A	#N/A	#N/A	422.148
49	#N/A	#N/A	#N/A	224.341	#N/A	#N/A	#N/A	338.596	#N/A	#N/A	#N/A	139.139	#N/A	#N/A	#N/A	264.633	#N/A	#N/A	#N/A	236.387	#N/A	#N/A	#N/A	256.308	#N/A	#N/A	#N/A	301.641	#N/A	#N/A	#N/A	513.92
50	633.33	#N/A	#N/A	#N/A	633.361	#N/A	#N/A	#N/A	633.283	#N/A	#N/A	#N/A	633.349	#N/A	#N/A	#N/A	633.33	#N/A	#N/A	#N/A	699.906	#N/A	#N/A	#N/A	659.383	#N/A	#N/A	#N/A	726.013	#N/A	#N/A	#N/A
51	457.093	#N/A	#N/A	#N/A	457.124	#N/A	#N/A	#N/A	457.047	#N/A	#N/A	#N/A	457.113	#N/A	#N/A	#N/A	457.093	#N/A	#N/A	#N/A	503.122	#N/A	#N/A	#N/A	483.146	#N/A	#N/A	#N/A	529.229	#N/A	#N/A	#N/A
52	471.365	#N/A	#N/A	#N/A	471.396	#N/A	#N/A	#N/A	471.318	#N/A	#N/A	#N/A	471.384	#N/A	#N/A	#N/A	471.365	#N/A	#N/A	#N/A	519.058	#N/A	#N/A	#N/A	497.417	#N/A	#N/A	#N/A	545.164	#N/A	#N/A	#N/A
53	639.656	#N/A	#N/A	#N/A	639.687	#N/A	#N/A	#N/A	639.61	#N/A	#N/A	#N/A	639.676	#N/A	#N/A	#N/A	639.656	#N/A	#N/A	#N/A	706.971	#N/A	#N/A	#N/A	665.709	#N/A	#N/A	#N/A	733.077	#N/A	#N/A	#N/A
54	#N/A	465.889	#N/A	#N/A	#N/A	465.92	#N/A	#N/A	#N/A	465.843	#N/A	#N/A	#N/A	465.909	#N/A	#N/A	#N/A	465.94	#N/A	#N/A	#N/A	553.321	#N/A	#N/A	#N/A	491.933	#N/A	#N/A	#N/A	579.494	#N/A	#N/A
55	645.434	#N/A	#N/A	#N/A	645.465	#N/A	#N/A	#N/A	645.388	#N/A	#N/A	#N/A	645.453	#N/A	#N/A	#N/A	645.434	#N/A	#N/A	#N/A	713.12	#N/A	#N/A	#N/A	672.68	#N/A	#N/A	#N/A	740.42	#N/A	#N/A	#N/A
56	#N/A	479.824	#N/A	#N/A	#N/A	479.855	#N/A	#N/A	#N/A	479.778	#N/A	#N/A	#N/A	479.843	#N/A	#N/A	#N/A	479.875	#N/A	#N/A	#N/A	569.286	#N/A	#N/A	#N/A	507.971	#N/A	#N/A	#N/A	597.562	#N/A	#N/A
57	695.373	#N/A	#N/A	#N/A	695.404	#N/A	#N/A	#N/A	695.326	#N/A	#N/A	#N/A	695.392	#N/A	#N/A	#N/A	695.373	#N/A	#N/A	#N/A	768.315	#N/A	#N/A	#N/A	724.856	#N/A	#N/A	#N/A	797.853	#N/A	#N/A	#N/A
58	609.472	#N/A	#N/A	#N/A	609.503	#N/A	#N/A	#N/A	609.426	#N/A	#N/A	#N/A	609.492	#N/A	#N/A	#N/A	609.472	#N/A	#N/A	#N/A	672.399	#N/A	#N/A	#N/A	638.956	#N/A	#N/A	#N/A	701.937	#N/A	#N/A	#N/A
59	695.373	#N/A	#N/A	#N/A	695.404	#N/A	#N/A	#N/A	695.326	#N/A	#N/A	#N/A	695.392	#N/A	#N/A	#N/A	695.373	#N/A	#N/A	#N/A	768.315	#N/A	#N/A	#N/A	724.856	#N/A	#N/A	#N/A	797.853	#N/A	#N/A	#N/A
60	628.57	#N/A	#N/A	#N/A	628.601	#N/A	#N/A	#N/A	628.524	#N/A	#N/A	#N/A	628.59	#N/A	#N/A	#N/A	628.57	#N/A	#N/A	#N/A	693.065	#N/A	#N/A	#N/A	660.659	#N/A	#N/A	#N/A	725.208	#N/A	#N/A	#N/A
61	456.554	#N/A	#N/A	#N/A	456.585	#N/A	#N/A	#N/A	456.508	#N/A	#N/A	#N/A	456.574	#N/A	#N/A	#N/A	456.554	#N/A	#N/A	#N/A	502.52	#N/A	#N/A	#N/A	482.607	#N/A	#N/A	#N/A	528.627	#N/A	#N/A	#N/A
62	500.321	#N/A	#N/A	#N/A	500.351	#N/A	#N/A	#N/A	500.274	#N/A	#N/A	#N/A	500.34	#N/A	#N/A	#N/A	500.321	#N/A	#N/A	#N/A	550.424	#N/A	#N/A	#N/A	530.192	#N/A	#N/A	#N/A	580.349	#N/A	#N/A	#N/A
63	452.475	#N/A	#N/A	#N/A	452.506	#N/A	#N/A	#N/A	452.429	#N/A	#N/A	#N/A	452.495	#N/A	#N/A	#N/A	452.475	#N/A	#N/A	#N/A	498.442	#N/A	#N/A	#N/A	476.645	#N/A	#N/A	#N/A	522.666	#N/A	#N/A	#N/A
64	422.02	#N/A	#N/A	#N/A	422.051	#N/A	#N/A	#N/A	421.973	#N/A	#N/A	#N/A	422.039	#N/A	#N/A	#N/A	422.02	#N/A	#N/A	#N/A	464.469	#N/A	#N/A	#N/A	446.06	#N/A	#N/A	#N/A	488.563	#N/A	#N/A	#N/A
65	#N/A	#N/A	347.255	#N/A	#N/A	#N/A	396.75	#N/A	#N/A	#N/A	310.334	#N/A	#N/A	#N/A	364.714	#N/A	#N/A	#N/A	348.399	#N/A	#N/A	#N/A	420.891	#N/A	#N/A	#N/A	383.556	#N/A	#N/A	#N/A	522.677	#N/A
66	#N/A	#N/A	#N/A	139.35	#N/A	#N/A	#N/A	231.503	#N/A	#N/A	#N/A	70.6037	#N/A	#N/A	#N/A	171.854	#N/A	#N/A	#N/A	143.061	#N/A	#N/A	#N/A	164.902	#N/A	#N/A	#N/A	181.723	#N/A	#N/A	#N/A	343.56
67	847.463	#N/A	#N/A	#N/A	847.494	#N/A	#N/A	#N/A	847.416	#N/A	#N/A	#N/A	847.482	#N/A	#N/A	#N/A	847.463	#N/A	#N/A	#N/A	934.666	#N/A	#N/A	#N/A	890.67	#N/A	#N/A	#N/A	977.927	#N/A	#N/A	#N/A
68	845.053	#N/A	#N/A	#N/A	845.084	#N/A	#N/A	#N/A	845.007	#N/A	#N/A	#N/A	845.072	#N/A	#N/A	#N/A	845.053	#N/A	#N/A	#N/A	932.844	#N/A	#N/A	#N/A	884.829	#N/A	#N/A	#N/A	972.674	#N/A	#N/A	#N/A
69	869.446	#N/A	#N/A	#N/A	869.477	#N/A	#N/A	#N/A	869.4	#N/A	#N/A	#N/A	869.466	#N/A	#N/A	#N/A	869.446	#N/A	#N/A	#N/A	959.213	#N/A	#N/A	#N/A	912.653	#N/A	#N/A	#N/A	1002.47	#N/A	#N/A	#N/A
70	504.817	#N/A	#N/A	#N/A	504.848	#N/A	#N/A	#N/A	504.77	#N/A	#N/A	#N/A	504.836	#N/A	#N/A	#N/A	504.817	#N/A	#N/A	#N/A	557.031	#N/A	#N/A	#N/A	528.034	#N/A	#N/A	#N/A	580.302	#N/A	#N/A	#N/A
71	549.689	#N/A	#N/A	#N/A	549.72	#N/A	#N/A	#N/A	549.642	#N/A	#N/A	#N/A	549.708	#N/A	#N/A	#N/A	549.689	#N/A	#N/A	#N/A	606.616	#N/A	#N/A	#N/A	575.138	#N/A	#N/A	#N/A	632.12	#N/A	#N/A	#N/A
72	#N/A	#N/A	295.98	#N/A	#N/A	#N/A	359.225	#N/A	#N/A	#N/A	248.648	#N/A	#N/A	#N/A	318.44	#N/A	#N/A	#N/A	297.627	#N/A	#N/A	#N/A	355.15	#N/A	#N/A	#N/A	336.971	#N/A	#N/A	#N/A	482.106	#N/A
73	538.382	#N/A	#N/A	#N/A	538.413	#N/A	#N/A	#N/A	538.335	#N/A	#N/A	#N/A	538.401	#N/A	#N/A	#N/A	538.382	#N/A	#N/A	#N/A	593.822	#N/A	#N/A	#N/A	564.558	#N/A	#N/A	#N/A	620.052	#N/A	#N/A	#N/A
74	639.15	#N/A	#N/A	#N/A	639.181	#N/A	#N/A	#N/A	639.104	#N/A	#N/A	#N/A	639.169	#N/A	#N/A	#N/A	639.15	#N/A	#N/A	#N/A	705.562	#N/A	#N/A	#N/A	668.669	#N/A	#N/A	#N/A	735.136	#N/A	#N/A	#N/A
75	502.722	#N/A	#N/A	#N/A	502.753	#N/A	#N/A	#N/A	502.676	#N/A	#N/A	#N/A	502.741	#N/A	#N/A	#N/A	502.722	#N/A	#N/A	#N/A	554.745	#N/A	#N/A	#N/A	525.711	#N/A	#N/A	#N/A	577.788	#N/A	#N/A	#N/A
76	469.931	#N/A	#N/A	#N/A	469.962	#N/A	#N/A	#N/A	469.885	#N/A	#N/A	#N/A	469.95	#N/A	#N/A	#N/A	469.931	#N/A	#N/A	#N/A	518.871	#N/A	#N/A	#N/A	489.733	#N/A	#N/A	#N/A	538.727	#N/A	#N/A	#N/A
77	505.931	#N/A	#N/A	#N/A	505.962	#N/A	#N/A	#N/A	505.884	#N/A	#N/A	#N/A	505.95	#N/A	#N/A	#N/A	505.931	#N/A	#N/A	#N/A	558.288	#N/A	#N/A	#N/A	529.09	#N/A	#N/A	#N/A	581.501	#N/A	#N/A	#N/A
78	450.094	#N/A	#N/A	#N/A	450.125	#N/A	#N/A	#N/A	450.047	#N/A	#N/A	#N/A	450.113	#N/A	#N/A	#N/A	450.094	#N/A	#N/A	#N/A	496.211	#N/A	#N/A	#N/A	472.092	#N/A	#N/A	#N/A	518.263	#N/A	#N/A	#N/A
79	663.247	#N/A	#N/A	#N/A	663.278	#N/A	#N/A	#N/A	663.201	#N/A	#N/A	#N/A	663.266	#N/A	#N/A	#N/A	663.247	#N/A	#N/A	#N/A	732.685	#N/A	#N/A	#N/A	691.833	#N/A	#N/A	#N/A	761.326	#N/A	#N/A	#N/A
80	602.42	#N/A	#N/A	#N/A	602.451	#N/A	#N/A	#N/A	602.374	#N/A	#N/A	#N/A	602.44	#N/A	#N/A	#N/A	602.42	#N/A	#N/A	#N/A	664.047	#N/A	#N/A	#N/A	634.106	#N/A	#N/A	#N/A	695.787	#N/A	#N/A	#N/A
81	576.599	#N/A	#N/A	#N/A	576.63	#N/A	#N/A	#N/A	576.552	#N/A	#N/A	#N/A	576.618	#N/A	#N/A	#N/A	576.599	#N/A	#N/A	#N/A	636.035	#N/A	#N/A	#N/A	604.753	#N/A	#N/A	#N/A	664.243	#N/A	#N/A	#N/A
82	#N/A	#N/A	391.483	#N/A	#N/A	#N/A	471.804	#N/A	#N/A	#N/A	331.408	#N/A	#N/A	#N/A	419.998	#N/A	#N/A	#N/A	393.146	#N/A	#N/A	#N/A	473.404	#N/A	#N/A	#N/A	440.349	#N/A	#N/A	#N/A	631.094	#N/A
83	752.824	#N/A	#N/A	#N/A	752.855	#N/A	#N/A	#N/A	752.777	#N/A	#N/A	#N/A	752.843	#N/A	#N/A	#N/A	752.824	#N/A	#N/A	#N/A	829.865	#N/A	#N/A	#N/A	793.642	#N/A	#N/A	#N/A	870.737	#N/A	#N/A	#N/A
84	483.434	#N/A	#N/A	#N/A	483.464	#N/A	#N/A	#N/A	483.387	#N/A	#N/A	#N/A	483.453	#N/A	#N/A	#N/A	483.434	#N/A	#N/A	#N/A	533.817	#N/A	#N/A	#N/A	503.801	#N/A	#N/A	#N/A	554.238	#N/A	#N/A	#N/A
85	666.625	#N/A	#N/A	#N/A	666.656	#N/A	#N/A	#N/A	666.579	#N/A	#N/A	#N/A	666.645	#N/A	#N/A	#N/A	666.625	#N/A	#N/A	#N/A	734.531	#N/A	#N/A	#N/A	703.504	#N/A	#N/A	#N/A	771.464	#N/A	#N/A	#N/A
86	#N/A	708.906	#N/A	#N/A	#N/A	708.937	#N/A	#N/A	#N/A	708.86	#N/A	#N/A	#N/A	708.925	#N/A	#N/A	#N/A	708.944	#N/A	#N/A	#N/A	843.68	#N/A	#N/A	#N/A	747.072	#N/A	#N/A	#N/A	881.957	#N/A	#N/A
87	601.044	#N/A	#N/A	#N/A	601.075	#N/A	#N/A	#N/A	600.998	#N/A	#N/A	#N/A	601.064	#N/A	#N/A	#N/A	601.044	#N/A	#N/A	#N/A	664.01	#N/A	#N/A	#N/A	626.277	#N/A	#N/A	#N/A	689.296	#N/A	#N/A	#N/A
88	#N/A	598.857	#N/A	#N/A	#N/A	598.888	#N/A	#N/A	#N/A	598.811	#N/A	#N/A	#N/A	598.877	#N/A	#N/A	#N/A	598.904	#N/A	#N/A	#N/A	715.525	#N/A	#N/A	#N/A	623.738	#N/A	#N/A	#N/A	740.53	#N/A	#N/A
89	#N/A	#N/A	466.889	#N/A	#N/A	#N/A	548.253	#N/A	#N/A	#N/A	406.041	#N/A	#N/A	#N/A	495.773	#N/A	#N/A	#N/A	468.6	#N/A	#N/A	#N/A	569.837	#N/A	#N/A	#N/A	514.066	#N/A	#N/A	#N/A	727.362	#N/A
90	596.91	#N/A	#N/A	#N/A	596.941	#N/A	#N/A	#N/A	596.863	#N/A	#N/A	#N/A	596.929	#N/A	#N/A	#N/A	596.91	#N/A	#N/A	#N/A	658.781	#N/A	#N/A	#N/A	624.776	#N/A	#N/A	#N/A	686.702	#N/A	#N/A	#N/A
91	#N/A	624.695	#N/A	#N/A	#N/A	624.726	#N/A	#N/A	#N/A	624.649	#N/A	#N/A	#N/A	624.714	#N/A	#N/A	#N/A	624.735	#N/A	#N/A	#N/A	744.275	#N/A	#N/A	#N/A	655.797	#N/A	#N/A	#N/A	775.491	#N/A	#N/A
92	695.695	#N/A	#N/A	#N/A	695.726	#N/A	#N/A	#N/A	695.649	#N/A	#N/A	#N/A	695.715	#N/A	#N/A	#N/A	695.695	#N/A	#N/A	#N/A	768.241	#N/A	#N/A	#N/A	727.191	#N/A	#N/A	#N/A	799.79	#N/A	#N/A	#N/A
93	586.867	#N/A	#N/A	#N/A	586.898	#N/A	#N/A	#N/A	586.821	#N/A	#N/A	#N/A	586.887	#N/A	#N/A	#N/A	586.867	#N/A	#N/A	#N/A	646.055	#N/A	#N/A	#N/A	621.247	#N/A	#N/A	#N/A	680.489	#N/A	#N/A	#N/A
94	#N/A	490.831	#N/A	#N/A	#N/A	490.862	#N/A	#N/A	#N/A	490.785	#N/A	#N/A	#N/A	490.851	#N/A	#N/A	#N/A	490.869	#N/A	#N/A	#N/A	583.53	#N/A	#N/A	#N/A	517.026	#N/A	#N/A	#N/A	609.837	#N/A	#N/A
95	598.386	#N/A	#N/A	#N/A	598.417	#N/A	#N/A	#N/A	598.339	#N/A	#N/A	#N/A	598.405	#N/A	#N/A	#N/A	598.386	#N/A	#N/A	#N/A	660.081	#N/A	#N/A	#N/A	627.749	#N/A	#N/A	#N/A	689.499	#N/A	#N/A	#N/A
96	676.756	#N/A	#N/A	#N/A	676.787	#N/A	#N/A	#N/A	676.71	#N/A	#N/A	#N/A	676.775	#N/A	#N/A	#N/A	676.756	#N/A	#N/A	#N/A	747.589	#N/A	#N/A	#N/A	706.119	#N/A	#N/A	#N/A	777.006	#N/A	#N/A	#N/A
97	480.774	#N/A	#N/A	#N/A	480.805	#N/A	#N/A	#N/A	480.728	#N/A	#N/A	#N/A	480.793	#N/A	#N/A	#N/A	480.774	#N/A	#N/A	#N/A	529.564	#N/A	#N/A	#N/A	506.827	#N/A	#N/A	#N/A	555.671	#N/A	#N/A	#N/A
98	475.59	#N/A	#N/A	#N/A	475.621	#N/A	#N/A	#N/A	475.544	#N/A	#N/A	#N/A	475.61	#N/A	#N/A	#N/A	475.59	#N/A	#N/A	#N/A	523.776	#N/A	#N/A	#N/A	501.643	#N/A	#N/A	#N/A	549.883	#N/A	#N/A	#N/A
99	565.558	#N/A	#N/A	#N/A	565.589	#N/A	#N/A	#N/A	565.511	#N/A	#N/A	#N/A	565.577	#N/A	#N/A	#N/A	565.558	#N/A	#N/A	#N/A	623.932	#N/A	#N/A	#N/A	592.801	#N/A	#N/A	#N/A	651.229	#N/A	#N/A	#N/A
100	630.522	#N/A	#N/A	#N/A	630.553	#N/A	#N/A	#N/A	630.476	#N/A	#N/A	#N/A	630.541	#N/A	#N/A	#N/A	630.522	#N/A	#N/A	#N/A	696.153	#N/A	#N/A	#N/A	659.018	#N/A	#N/A	#N/A	724.703	#N/A	#N/A	#N/A
101	585.354	#N/A	#N/A	#N/A	585.385	#N/A	#N/A	#N/A	585.307	#N/A	#N/A	#N/A	585.373	#N/A	#N/A	#N/A	585.354	#N/A	#N/A	#N/A	646.121	#N/A	#N/A	#N/A	612.261	#N/A	#N/A	#N/A	673.082	#N/A	#N/A	#N/A
102	620.288	#N/A	#N/A	#N/A	620.319	#N/A	#N/A	#N/A	620.241	#N/A	#N/A	#N/A	620.307	#N/A	#N/A	#N/A	620.288	#N/A	#N/A	#N/A	684.005	#N/A	#N/A	#N/A	651.633	#N/A	#N/A	#N/A	715.404	#N/A	#N/A	#N/A
103	636.043	#N/A	#N/A	#N/A	636.074	#N/A	#N/A	#N/A	635.997	#N/A	#N/A	#N/A	636.062	#N/A	#N/A	#N/A	636.043	#N/A	#N/A	#N/A	702.936	#N/A	#N/A	#N/A	662.096	#N/A	#N/A	#N/A	729.043	#N/A	#N/A	#N/A
104	644.32	#N/A	#N/A	#N/A	644.351	#N/A	#N/A	#N/A	644.274	#N/A	#N/A	#N/A	644.339	#N/A	#N/A	#N/A	644.32	#N/A	#N/A	#N/A	710.442	#N/A	#N/A	#N/A	677.234	#N/A	#N/A	#N/A	743.411	#N/A	#N/A	#N/A
105	#N/A	#N/A	590.64	#N/A	#N/A	#N/A	630.881	#N/A	#N/A	#N/A	560.63	#N/A	#N/A	#N/A	604.834	#N/A	#N/A	#N/A	591.344	#N/A	#N/A	#N/A	730.05	#N/A	#N/A	#N/A	623.734	#N/A	#N/A	#N/A	816.232	#N/A
106	890.448	#N/A	#N/A	#N/A	890.479	#N/A	#N/A	#N/A	890.402	#N/A	#N/A	#N/A	890.468	#N/A	#N/A	#N/A	890.448	#N/A	#N/A	#N/A	986.367	#N/A	#N/A	#N/A	919.015	#N/A	#N/A	#N/A	1014.99	#N/A	#N/A	#N/A
107	945.02	#N/A	#N/A	#N/A	945.051	#N/A	#N/A	#N/A	944.973	#N/A	#N/A	#N/A	945.039	#N/A	#N/A	#N/A	945.02	#N/A	#N/A	#N/A	1046.2	#N/A	#N/A	#N/A	977.934	#N/A	#N/A	#N/A	1079.17	#N/A	#N/A	#N/A
108	745.964	#N/A	#N/A	#N/A	745.995	#N/A	#N/A	#N/A	745.918	#N/A	#N/A	#N/A	745.983	#N/A	#N/A	#N/A	745.964	#N/A	#N/A	#N/A	825.673	#N/A	#N/A	#N/A	772.017	#N/A	#N/A	#N/A	851.78	#N/A	#N/A	#N/A
109	876.451	#N/A	#N/A	#N/A	876.482	#N/A	#N/A	#N/A	876.405	#N/A	#N/A	#N/A	876.47	#N/A	#N/A	#N/A	876.451	#N/A	#N/A	#N/A	971.373	#N/A	#N/A	#N/A	902.504	#N/A	#N/A	#N/A	997.48	#N/A	#N/A	#N/A
110	880.491	#N/A	#N/A	#N/A	880.522	#N/A	#N/A	#N/A	880.444	#N/A	#N/A	#N/A	880.51	#N/A	#N/A	#N/A	880.491	#N/A	#N/A	#N/A	975.884	#N/A	#N/A	#N/A	906.544	#N/A	#N/A	#N/A	1001.99	#N/A	#N/A	#N/A
111	634.145	#N/A	#N/A	#N/A	634.176	#N/A	#N/A	#N/A	634.098	#N/A	#N/A	#N/A	634.164	#N/A	#N/A	#N/A	634.145	#N/A	#N/A	#N/A	700.816	#N/A	#N/A	#N/A	660.197	#N/A	#N/A	#N/A	726.923	#N/A	#N/A	#N/A
112	637.915	#N/A	#N/A	#N/A	637.946	#N/A	#N/A	#N/A	637.869	#N/A	#N/A	#N/A	637.935	#N/A	#N/A	#N/A	637.915	#N/A	#N/A	#N/A	705.027	#N/A	#N/A	#N/A	663.968	#N/A	#N/A	#N/A	731.133	#N/A	#N/A	#N/A
113	#N/A	#N/A	614.821	#N/A	#N/A	#N/A	647.349	#N/A	#N/A	#N/A	590.554	#N/A	#N/A	#N/A	626.297	#N/A	#N/A	#N/A	615.569	#N/A	#N/A	#N/A	759.83	#N/A	#N/A	#N/A	648.133	#N/A	#N/A	#N/A	836.243	#N/A
114	#N/A	#N/A	#N/A	215.207	#N/A	#N/A	#N/A	325.062	#N/A	#N/A	#N/A	133.282	#N/A	#N/A	#N/A	253.949	#N/A	#N/A	#N/A	228.109	#N/A	#N/A	#N/A	245.897	#N/A	#N/A	#N/A	289.144	#N/A	#N/A	#N/A	495.054
115	713.188	#N/A	#N/A	#N/A	713.219	#N/A	#N/A	#N/A	713.142	#N/A	#N/A	#N/A	713.208	#N/A	#N/A	#N/A	713.188	#N/A	#N/A	#N/A	787.987	#N/A	#N/A	#N/A	743.769	#N/A	#N/A	#N/A	818.621	#N/A	#N/A	#N/A
116	476.514	#N/A	#N/A	#N/A	476.545	#N/A	#N/A	#N/A	476.468	#N/A	#N/A	#N/A	476.533	#N/A	#N/A	#N/A	476.514	#N/A	#N/A	#N/A	526.01	#N/A	#N/A	#N/A	497.227	#N/A	#N/A	#N/A	546.776	#N/A	#N/A	#N/A
117	517.793	#N/A	#N/A	#N/A	517.824	#N/A	#N/A	#N/A	517.747	#N/A	#N/A	#N/A	517.813	#N/A	#N/A	#N/A	517.793	#N/A	#N/A	#N/A	570.912	#N/A	#N/A	#N/A	543.632	#N/A	#N/A	#N/A	596.804	#N/A	#N/A	#N/A
118	445.269	#N/A	#N/A	#N/A	445.3	#N/A	#N/A	#N/A	445.223	#N/A	#N/A	#N/A	445.289	#N/A	#N/A	#N/A	445.269	#N/A	#N/A	#N/A	491.139	#N/A	#N/A	#N/A	465.909	#N/A	#N/A	#N/A	511.833	#N/A	#N/A	#N/A
119	#N/A	339.604	#N/A	#N/A	#N/A	339.635	#N/A	#N/A	#N/A	339.557	#N/A	#N/A	#N/A	339.623	#N/A	#N/A	#N/A	339.711	#N/A	#N/A	#N/A	400.916	#N/A	#N/A	#N/A	362.617	#N/A	#N/A	#N/A	424.145	#N/A	#N/A
120	675.665	#N/A	#N/A	#N/A	675.696	#N/A	#N/A	#N/A	675.619	#N/A	#N/A	#N/A	675.685	#N/A	#N/A	#N/A	675.665	#N/A	#N/A	#N/A	744.817	#N/A	#N/A	#N/A	711.719	#N/A	#N/A	#N/A	780.924	#N/A	#N/A	#N/A
121	553.901	#N/A	#N/A	#N/A	553.932	#N/A	#N/A	#N/A	553.855	#N/A	#N/A	#N/A	553.92	#N/A	#N/A	#N/A	553.901	#N/A	#N/A	#N/A	610.971	#N/A	#N/A	#N/A	580.85	#N/A	#N/A	#N/A	637.974	#N/A	#N/A	#N/A
122	#N/A	522.149	#N/A	#N/A	#N/A	522.18	#N/A	#N/A	#N/A	522.103	#N/A	#N/A	#N/A	522.168	#N/A	#N/A	#N/A	522.296	#N/A	#N/A	#N/A	619.067	#N/A	#N/A	#N/A	554.29	#N/A	#N/A	#N/A	651.482	#N/A	#N/A
123	#N/A	#N/A	#N/A	249.062	#N/A	#N/A	#N/A	391.207	#N/A	#N/A	#N/A	142.757	#N/A	#N/A	#N/A	299.52	#N/A	#N/A	#N/A	263.425	#N/A	#N/A	#N/A	289.445	#N/A	#N/A	#N/A	337.448	#N/A	#N/A	#N/A	607.545
124	636.133	#N/A	#N/A	#N/A	636.164	#N/A	#N/A	#N/A	636.087	#N/A	#N/A	#N/A	636.153	#N/A	#N/A	#N/A	636.133	#N/A	#N/A	#N/A	701.969	#N/A	#N/A	#N/A	666.619	#N/A	#N/A	#N/A	732.509	#N/A	#N/A	#N/A
125	#N/A	557.906	#N/A	#N/A	#N/A	557.937	#N/A	#N/A	#N/A	557.86	#N/A	#N/A	#N/A	557.925	#N/A	#N/A	#N/A	558.045	#N/A	#N/A	#N/A	661.068	#N/A	#N/A	#N/A	593.524	#N/A	#N/A	#N/A	696.95	#N/A	#N/A
126	503.114	#N/A	#N/A	#N/A	503.145	#N/A	#N/A	#N/A	503.068	#N/A	#N/A	#N/A	503.133	#N/A	#N/A	#N/A	503.114	#N/A	#N/A	#N/A	555.096	#N/A	#N/A	#N/A	526.477	#N/A	#N/A	#N/A	578.513	#N/A	#N/A	#N/A
127	#N/A	360.889	#N/A	#N/A	#N/A	360.92	#N/A	#N/A	#N/A	360.842	#N/A	#N/A	#N/A	360.908	#N/A	#N/A	#N/A	360.996	#N/A	#N/A	#N/A	426.61	#N/A	#N/A	#N/A	384.37	#N/A	#N/A	#N/A	450.306	#N/A	#N/A
128	578.203	#N/A	#N/A	#N/A	578.234	#N/A	#N/A	#N/A	578.157	#N/A	#N/A	#N/A	578.222	#N/A	#N/A	#N/A	578.203	#N/A	#N/A	#N/A	638.209	#N/A	#N/A	#N/A	604.711	#N/A	#N/A	#N/A	664.771	#N/A	#N/A	#N/A
129	497.417	#N/A	#N/A	#N/A	497.448	#N/A	#N/A	#N/A	497.371	#N/A	#N/A	#N/A	497.437	#N/A	#N/A	#N/A	497.417	#N/A	#N/A	#N/A	548.822	#N/A	#N/A	#N/A	520.406	#N/A	#N/A	#N/A	571.865	#N/A	#N/A	#N/A
130	602.927	#N/A	#N/A	#N/A	602.958	#N/A	#N/A	#N/A	602.88	#N/A	#N/A	#N/A	602.946	#N/A	#N/A	#N/A	602.927	#N/A	#N/A	#N/A	664.723	#N/A	#N/A	#N/A	634.135	#N/A	#N/A	#N/A	695.986	#N/A	#N/A	#N/A
131	#N/A	#N/A	422.681	#N/A	#N/A	#N/A	492.536	#N/A	#N/A	#N/A	370.431	#N/A	#N/A	#N/A	447.482	#N/A	#N/A	#N/A	423.897	#N/A	#N/A	#N/A	511.802	#N/A	#N/A	#N/A	471.925	#N/A	#N/A	#N/A	655.34	#N/A
132	508.716	#N/A	#N/A	#N/A	508.747	#N/A	#N/A	#N/A	508.67	#N/A	#N/A	#N/A	508.736	#N/A	#N/A	#N/A	508.716	#N/A	#N/A	#N/A	561.438	#N/A	#N/A	#N/A	531.705	#N/A	#N/A	#N/A	584.481	#N/A	#N/A	#N/A
133	561.039	#N/A	#N/A	#N/A	561.07	#N/A	#N/A	#N/A	560.993	#N/A	#N/A	#N/A	561.058	#N/A	#N/A	#N/A	561.039	#N/A	#N/A	#N/A	618.852	#N/A	#N/A	#N/A	588.37	#N/A	#N/A	#N/A	646.237	#N/A	#N/A	#N/A
134	683.521	#N/A	#N/A	#N/A	683.552	#N/A	#N/A	#N/A	683.475	#N/A	#N/A	#N/A	683.54	#N/A	#N/A	#N/A	683.521	#N/A	#N/A	#N/A	753.008	#N/A	#N/A	#N/A	722.077	#N/A	#N/A	#N/A	791.617	#N/A	#N/A	#N/A
135	413.632	#N/A	#N/A	#N/A	413.663	#N/A	#N/A	#N/A	413.586	#N/A	#N/A	#N/A	413.652	#N/A	#N/A	#N/A	413.632	#N/A	#N/A	#N/A	455.484	#N/A	#N/A	#N/A	436.167	#N/A	#N/A	#N/A	478.073	#N/A	#N/A	#N/A
136	#N/A	345.138	#N/A	#N/A	#N/A	345.169	#N/A	#N/A	#N/A	345.091	#N/A	#N/A	#N/A	345.157	#N/A	#N/A	#N/A	345.263	#N/A	#N/A	#N/A	406.413	#N/A	#N/A	#N/A	371.179	#N/A	#N/A	#N/A	432.692	#N/A	#N/A
137	#N/A	#N/A	234.316	#N/A	#N/A	#N/A	291.826	#N/A	#N/A	#N/A	191.401	#N/A	#N/A	#N/A	254.605	#N/A	#N/A	#N/A	235.97	#N/A	#N/A	#N/A	278.117	#N/A	#N/A	#N/A	271.262	#N/A	#N/A	#N/A	391.408	#N/A
138	572.802	#N/A	#N/A	#N/A	572.833	#N/A	#N/A	#N/A	572.756	#N/A	#N/A	#N/A	572.821	#N/A	#N/A	#N/A	572.802	#N/A	#N/A	#N/A	632.559	#N/A	#N/A	#N/A	597.917	#N/A	#N/A	#N/A	657.728	#N/A	#N/A	#N/A
139	#N/A	#N/A	#N/A	199.809	#N/A	#N/A	#N/A	307.236	#N/A	#N/A	#N/A	119.691	#N/A	#N/A	#N/A	237.696	#N/A	#N/A	#N/A	212.208	#N/A	#N/A	#N/A	229.794	#N/A	#N/A	#N/A	267.114	#N/A	#N/A	#N/A	468.089
140	#N/A	#N/A	298.718	#N/A	#N/A	#N/A	359.856	#N/A	#N/A	#N/A	253.113	#N/A	#N/A	#N/A	320.283	#N/A	#N/A	#N/A	300.372	#N/A	#N/A	#N/A	357.676	#N/A	#N/A	#N/A	339.727	#N/A	#N/A	#N/A	479.885	#N/A
141	490.234	#N/A	#N/A	#N/A	490.265	#N/A	#N/A	#N/A	490.188	#N/A	#N/A	#N/A	490.254	#N/A	#N/A	#N/A	490.234	#N/A	#N/A	#N/A	540.127	#N/A	#N/A	#N/A	516.287	#N/A	#N/A	#N/A	566.234	#N/A	#N/A	#N/A
142	546.452	#N/A	#N/A	#N/A	546.483	#N/A	#N/A	#N/A	546.406	#N/A	#N/A	#N/A	546.471	#N/A	#N/A	#N/A	546.452	#N/A	#N/A	#N/A	602.032	#N/A	#N/A	#N/A	575.935	#N/A	#N/A	#N/A	631.569	#N/A	#N/A	#N/A
143	590.303	#N/A	#N/A	#N/A	590.334	#N/A	#N/A	#N/A	590.257	#N/A	#N/A	#N/A	590.322	#N/A	#N/A	#N/A	590.303	#N/A	#N/A	#N/A	651.398	#N/A	#N/A	#N/A	618.196	#N/A	#N/A	#N/A	679.345	#N/A	#N/A	#N/A
144	452.33	#N/A	#N/A	#N/A	452.361	#N/A	#N/A	#N/A	452.283	#N/A	#N/A	#N/A	452.349	#N/A	#N/A	#N/A	452.33	#N/A	#N/A	#N/A	499.487	#N/A	#N/A	#N/A	470.972	#N/A	#N/A	#N/A	518.183	#N/A	#N/A	#N/A
145	490.407	#N/A	#N/A	#N/A	490.438	#N/A	#N/A	#N/A	490.36	#N/A	#N/A	#N/A	490.426	#N/A	#N/A	#N/A	490.407	#N/A	#N/A	#N/A	540.775	#N/A	#N/A	#N/A	514.336	#N/A	#N/A	#N/A	564.759	#N/A	#N/A	#N/A
146	774.974	#N/A	#N/A	#N/A	775.005	#N/A	#N/A	#N/A	774.928	#N/A	#N/A	#N/A	774.994	#N/A	#N/A	#N/A	774.974	#N/A	#N/A	#N/A	855.082	#N/A	#N/A	#N/A	813.706	#N/A	#N/A	#N/A	893.868	#N/A	#N/A	#N/A
147	640.962	#N/A	#N/A	#N/A	640.993	#N/A	#N/A	#N/A	640.916	#N/A	#N/A	#N/A	640.981	#N/A	#N/A	#N/A	640.962	#N/A	#N/A	#N/A	705.401	#N/A	#N/A	#N/A	679.887	#N/A	#N/A	#N/A	744.38	#N/A	#N/A	#N/A
148	488.533	#N/A	#N/A	#N/A	488.564	#N/A	#N/A	#N/A	488.487	#N/A	#N/A	#N/A	488.552	#N/A	#N/A	#N/A	488.533	#N/A	#N/A	#N/A	538.901	#N/A	#N/A	#N/A	511.522	#N/A	#N/A	#N/A	561.944	#N/A	#N/A	#N/A
149	549.079	#N/A	#N/A	#N/A	549.11	#N/A	#N/A	#N/A	549.033	#N/A	#N/A	#N/A	549.098	#N/A	#N/A	#N/A	549.079	#N/A	#N/A	#N/A	605.869	#N/A	#N/A	#N/A	574.814	#N/A	#N/A	#N/A	631.658	#N/A	#N/A	#N/A
150	574.636	#N/A	#N/A	#N/A	574.667	#N/A	#N/A	#N/A	574.59	#N/A	#N/A	#N/A	574.656	#N/A	#N/A	#N/A	574.636	#N/A	#N/A	#N/A	633.877	#N/A	#N/A	#N/A	602.651	#N/A	#N/A	#N/A	661.945	#N/A	#N/A	#N/A
151	524.994	#N/A	#N/A	#N/A	525.025	#N/A	#N/A	#N/A	524.947	#N/A	#N/A	#N/A	525.013	#N/A	#N/A	#N/A	524.994	#N/A	#N/A	#N/A	579.289	#N/A	#N/A	#N/A	549.377	#N/A	#N/A	#N/A	603.727	#N/A	#N/A	#N/A
152	634.206	#N/A	#N/A	#N/A	634.237	#N/A	#N/A	#N/A	634.16	#N/A	#N/A	#N/A	634.226	#N/A	#N/A	#N/A	634.206	#N/A	#N/A	#N/A	700.203	#N/A	#N/A	#N/A	663.031	#N/A	#N/A	#N/A	729.082	#N/A	#N/A	#N/A
153	455.886	#N/A	#N/A	#N/A	455.917	#N/A	#N/A	#N/A	455.84	#N/A	#N/A	#N/A	455.906	#N/A	#N/A	#N/A	455.886	#N/A	#N/A	#N/A	502.621	#N/A	#N/A	#N/A	478.132	#N/A	#N/A	#N/A	524.921	#N/A	#N/A	#N/A
154	677.841	#N/A	#N/A	#N/A	677.871	#N/A	#N/A	#N/A	677.794	#N/A	#N/A	#N/A	677.86	#N/A	#N/A	#N/A	677.841	#N/A	#N/A	#N/A	748.666	#N/A	#N/A	#N/A	707.78	#N/A	#N/A	#N/A	778.66	#N/A	#N/A	#N/A
155	606.261	#N/A	#N/A	#N/A	606.292	#N/A	#N/A	#N/A	606.215	#N/A	#N/A	#N/A	606.28	#N/A	#N/A	#N/A	606.261	#N/A	#N/A	#N/A	667.785	#N/A	#N/A	#N/A	640.315	#N/A	#N/A	#N/A	701.893	#N/A	#N/A	#N/A
156	742.896	#N/A	#N/A	#N/A	742.927	#N/A	#N/A	#N/A	742.85	#N/A	#N/A	#N/A	742.916	#N/A	#N/A	#N/A	742.896	#N/A	#N/A	#N/A	819.432	#N/A	#N/A	#N/A	780.908	#N/A	#N/A	#N/A	857.498	#N/A	#N/A	#N/A
157	643.09	#N/A	#N/A	#N/A	643.121	#N/A	#N/A	#N/A	643.043	#N/A	#N/A	#N/A	643.109	#N/A	#N/A	#N/A	643.09	#N/A	#N/A	#N/A	707.788	#N/A	#N/A	#N/A	681.963	#N/A	#N/A	#N/A	746.716	#N/A	#N/A	#N/A
158	727.128	#N/A	#N/A	#N/A	727.159	#N/A	#N/A	#N/A	727.082	#N/A	#N/A	#N/A	727.148	#N/A	#N/A	#N/A	727.128	#N/A	#N/A	#N/A	802.249	#N/A	#N/A	#N/A	763.315	#N/A	#N/A	#N/A	838.49	#N/A	#N/A	#N/A
159	641.539	#N/A	#N/A	#N/A	641.57	#N/A	#N/A	#N/A	641.493	#N/A	#N/A	#N/A	641.559	#N/A	#N/A	#N/A	641.539	#N/A	#N/A	#N/A	706.152	#N/A	#N/A	#N/A	680.004	#N/A	#N/A	#N/A	744.671	#N/A	#N/A	#N/A
160	445.41	#N/A	#N/A	#N/A	445.441	#N/A	#N/A	#N/A	445.364	#N/A	#N/A	#N/A	445.43	#N/A	#N/A	#N/A	445.41	#N/A	#N/A	#N/A	491.639	#N/A	#N/A	#N/A	464.577	#N/A	#N/A	#N/A	510.859	#N/A	#N/A	#N/A
161	581.834	#N/A	#N/A	#N/A	581.865	#N/A	#N/A	#N/A	581.788	#N/A	#N/A	#N/A	581.854	#N/A	#N/A	#N/A	581.834	#N/A	#N/A	#N/A	642.203	#N/A	#N/A	#N/A	608.602	#N/A	#N/A	#N/A	669.025	#N/A	#N/A	#N/A
162	528.552	#N/A	#N/A	#N/A	528.583	#N/A	#N/A	#N/A	528.506	#N/A	#N/A	#N/A	528.571	#N/A	#N/A	#N/A	528.552	#N/A	#N/A	#N/A	583.123	#N/A	#N/A	#N/A	553.537	#N/A	#N/A	#N/A	608.161	#N/A	#N/A	#N/A
163	652.505	#N/A	#N/A	#N/A	652.536	#N/A	#N/A	#N/A	652.458	#N/A	#N/A	#N/A	652.524	#N/A	#N/A	#N/A	652.505	#N/A	#N/A	#N/A	720.632	#N/A	#N/A	#N/A	681.345	#N/A	#N/A	#N/A	749.526	#N/A	#N/A	#N/A
164	698.633	#N/A	#N/A	#N/A	698.664	#N/A	#N/A	#N/A	698.587	#N/A	#N/A	#N/A	698.653	#N/A	#N/A	#N/A	698.633	#N/A	#N/A	#N/A	771.42	#N/A	#N/A	#N/A	730.566	#N/A	#N/A	#N/A	803.407	#N/A	#N/A	#N/A
165	616.094	#N/A	#N/A	#N/A	616.125	#N/A	#N/A	#N/A	616.048	#N/A	#N/A	#N/A	616.113	#N/A	#N/A	#N/A	616.094	#N/A	#N/A	#N/A	678.786	#N/A	#N/A	#N/A	650.057	#N/A	#N/A	#N/A	712.803	#N/A	#N/A	#N/A
166	478.712	#N/A	#N/A	#N/A	478.743	#N/A	#N/A	#N/A	478.665	#N/A	#N/A	#N/A	478.731	#N/A	#N/A	#N/A	478.712	#N/A	#N/A	#N/A	527.935	#N/A	#N/A	#N/A	501.701	#N/A	#N/A	#N/A	550.978	#N/A	#N/A	#N/A
167	749.633	#N/A	#N/A	#N/A	749.664	#N/A	#N/A	#N/A	749.587	#N/A	#N/A	#N/A	749.652	#N/A	#N/A	#N/A	749.633	#N/A	#N/A	#N/A	826.991	#N/A	#N/A	#N/A	787.486	#N/A	#N/A	#N/A	864.898	#N/A	#N/A	#N/A
168	643.959	#N/A	#N/A	#N/A	643.99	#N/A	#N/A	#N/A	643.912	#N/A	#N/A	#N/A	643.978	#N/A	#N/A	#N/A	643.959	#N/A	#N/A	#N/A	708.747	#N/A	#N/A	#N/A	682.884	#N/A	#N/A	#N/A	747.726	#N/A	#N/A	#N/A
169	418.352	#N/A	#N/A	#N/A	418.383	#N/A	#N/A	#N/A	418.305	#N/A	#N/A	#N/A	418.371	#N/A	#N/A	#N/A	418.352	#N/A	#N/A	#N/A	461.047	#N/A	#N/A	#N/A	439.725	#N/A	#N/A	#N/A	482.475	#N/A	#N/A	#N/A
170	470.223	#N/A	#N/A	#N/A	470.253	#N/A	#N/A	#N/A	470.176	#N/A	#N/A	#N/A	470.242	#N/A	#N/A	#N/A	470.223	#N/A	#N/A	#N/A	517.526	#N/A	#N/A	#N/A	497.288	#N/A	#N/A	#N/A	544.645	#N/A	#N/A	#N/A
171	504.799	#N/A	#N/A	#N/A	504.83	#N/A	#N/A	#N/A	504.753	#N/A	#N/A	#N/A	504.819	#N/A	#N/A	#N/A	504.799	#N/A	#N/A	#N/A	556.757	#N/A	#N/A	#N/A	529.403	#N/A	#N/A	#N/A	581.415	#N/A	#N/A	#N/A
172	528.231	#N/A	#N/A	#N/A	528.262	#N/A	#N/A	#N/A	528.185	#N/A	#N/A	#N/A	528.251	#N/A	#N/A	#N/A	528.231	#N/A	#N/A	#N/A	582.312	#N/A	#N/A	#N/A	555.244	#N/A	#N/A	#N/A	609.378	#N/A	#N/A	#N/A
173	#N/A	#N/A	#N/A	223.771	#N/A	#N/A	#N/A	336.079	#N/A	#N/A	#N/A	140.019	#N/A	#N/A	#N/A	263.378	#N/A	#N/A	#N/A	237.371	#N/A	#N/A	#N/A	255.174	#N/A	#N/A	#N/A	301.183	#N/A	#N/A	#N/A	512.362
174	474.398	#N/A	#N/A	#N/A	474.429	#N/A	#N/A	#N/A	474.352	#N/A	#N/A	#N/A	474.417	#N/A	#N/A	#N/A	474.398	#N/A	#N/A	#N/A	522.444	#N/A	#N/A	#N/A	500.451	#N/A	#N/A	#N/A	548.551	#N/A	#N/A	#N/A
175	#N/A	#N/A	#N/A	158.13	#N/A	#N/A	#N/A	245.32	#N/A	#N/A	#N/A	93.0793	#N/A	#N/A	#N/A	188.886	#N/A	#N/A	#N/A	166.732	#N/A	#N/A	#N/A	182.241	#N/A	#N/A	#N/A	210.114	#N/A	#N/A	#N/A	370.504
176	577.939	#N/A	#N/A	#N/A	577.97	#N/A	#N/A	#N/A	577.893	#N/A	#N/A	#N/A	577.958	#N/A	#N/A	#N/A	577.939	#N/A	#N/A	#N/A	638.315	#N/A	#N/A	#N/A	602.973	#N/A	#N/A	#N/A	663.404	#N/A	#N/A	#N/A
177	654.116	#N/A	#N/A	#N/A	654.147	#N/A	#N/A	#N/A	654.07	#N/A	#N/A	#N/A	654.136	#N/A	#N/A	#N/A	654.116	#N/A	#N/A	#N/A	723.117	#N/A	#N/A	#N/A	680.169	#N/A	#N/A	#N/A	749.223	#N/A	#N/A	#N/A
178	446.455	#N/A	#N/A	#N/A	446.486	#N/A	#N/A	#N/A	446.409	#N/A	#N/A	#N/A	446.475	#N/A	#N/A	#N/A	446.455	#N/A	#N/A	#N/A	492.285	#N/A	#N/A	#N/A	468.393	#N/A	#N/A	#N/A	514.277	#N/A	#N/A	#N/A
179	403.826	#N/A	#N/A	#N/A	403.857	#N/A	#N/A	#N/A	403.78	#N/A	#N/A	#N/A	403.846	#N/A	#N/A	#N/A	403.826	#N/A	#N/A	#N/A	444.589	#N/A	#N/A	#N/A	426.144	#N/A	#N/A	#N/A	466.962	#N/A	#N/A	#N/A
180	414.033	#N/A	#N/A	#N/A	414.064	#N/A	#N/A	#N/A	413.987	#N/A	#N/A	#N/A	414.052	#N/A	#N/A	#N/A	414.033	#N/A	#N/A	#N/A	456.082	#N/A	#N/A	#N/A	435.971	#N/A	#N/A	#N/A	478.074	#N/A	#N/A	#N/A
181	#N/A	#N/A	#N/A	210.764	#N/A	#N/A	#N/A	357.669	#N/A	#N/A	#N/A	101.254	#N/A	#N/A	#N/A	262.562	#N/A	#N/A	#N/A	219.367	#N/A	#N/A	#N/A	252.209	#N/A	#N/A	#N/A	275.53	#N/A	#N/A	#N/A	539.305
182	466.77	#N/A	#N/A	#N/A	466.801	#N/A	#N/A	#N/A	466.724	#N/A	#N/A	#N/A	466.79	#N/A	#N/A	#N/A	466.77	#N/A	#N/A	#N/A	514.795	#N/A	#N/A	#N/A	489.392	#N/A	#N/A	#N/A	537.471	#N/A	#N/A	#N/A
183	592.962	#N/A	#N/A	#N/A	592.993	#N/A	#N/A	#N/A	592.916	#N/A	#N/A	#N/A	592.981	#N/A	#N/A	#N/A	592.962	#N/A	#N/A	#N/A	654.025	#N/A	#N/A	#N/A	622.325	#N/A	#N/A	#N/A	683.442	#N/A	#N/A	#N/A
184	565.299	#N/A	#N/A	#N/A	565.33	#N/A	#N/A	#N/A	565.253	#N/A	#N/A	#N/A	565.319	#N/A	#N/A	#N/A	565.299	#N/A	#N/A	#N/A	623.878	#N/A	#N/A	#N/A	591.475	#N/A	#N/A	#N/A	650.108	#N/A	#N/A	#N/A
185	534.613	#N/A	#N/A	#N/A	534.644	#N/A	#N/A	#N/A	534.567	#N/A	#N/A	#N/A	534.632	#N/A	#N/A	#N/A	534.613	#N/A	#N/A	#N/A	589.888	#N/A	#N/A	#N/A	559.606	#N/A	#N/A	#N/A	614.935	#N/A	#N/A	#N/A
186	520.187	#N/A	#N/A	#N/A	520.218	#N/A	#N/A	#N/A	520.141	#N/A	#N/A	#N/A	520.206	#N/A	#N/A	#N/A	520.187	#N/A	#N/A	#N/A	574.014	#N/A	#N/A	#N/A	544.177	#N/A	#N/A	#N/A	598.058	#N/A	#N/A	#N/A
187	#N/A	420.312	#N/A	#N/A	#N/A	420.343	#N/A	#N/A	#N/A	420.266	#N/A	#N/A	#N/A	420.331	#N/A	#N/A	#N/A	420.459	#N/A	#N/A	#N/A	497.173	#N/A	#N/A	#N/A	447.808	#N/A	#N/A	#N/A	524.944	#N/A	#N/A
188	#N/A	#N/A	284.658	#N/A	#N/A	#N/A	349.71	#N/A	#N/A	#N/A	235.978	#N/A	#N/A	#N/A	307.758	#N/A	#N/A	#N/A	286	#N/A	#N/A	#N/A	341.42	#N/A	#N/A	#N/A	324.851	#N/A	#N/A	#N/A	469.544	#N/A
189	485.22	#N/A	#N/A	#N/A	485.251	#N/A	#N/A	#N/A	485.174	#N/A	#N/A	#N/A	485.239	#N/A	#N/A	#N/A	485.22	#N/A	#N/A	#N/A	534.932	#N/A	#N/A	#N/A	509.374	#N/A	#N/A	#N/A	559.139	#N/A	#N/A	#N/A
190	#N/A	363.237	#N/A	#N/A	#N/A	363.268	#N/A	#N/A	#N/A	363.191	#N/A	#N/A	#N/A	363.257	#N/A	#N/A	#N/A	363.385	#N/A	#N/A	#N/A	429.023	#N/A	#N/A	#N/A	387.75	#N/A	#N/A	#N/A	453.81	#N/A	#N/A
191	#N/A	#N/A	266.927	#N/A	#N/A	#N/A	330.905	#N/A	#N/A	#N/A	219.048	#N/A	#N/A	#N/A	289.647	#N/A	#N/A	#N/A	268.269	#N/A	#N/A	#N/A	318.767	#N/A	#N/A	#N/A	307.326	#N/A	#N/A	#N/A	445.643	#N/A
192	#N/A	#N/A	#N/A	191.314	#N/A	#N/A	#N/A	294.861	#N/A	#N/A	#N/A	114.084	#N/A	#N/A	#N/A	227.833	#N/A	#N/A	#N/A	201.267	#N/A	#N/A	#N/A	220.173	#N/A	#N/A	#N/A	255.449	#N/A	#N/A	#N/A	446.132
193	#N/A	#N/A	#N/A	193.071	#N/A	#N/A	#N/A	303.673	#N/A	#N/A	#N/A	110.59	#N/A	#N/A	#N/A	232.077	#N/A	#N/A	#N/A	201.914	#N/A	#N/A	#N/A	223.978	#N/A	#N/A	#N/A	256.661	#N/A	#N/A	#N/A	457.934
194	537.072	#N/A	#N/A	#N/A	537.103	#N/A	#N/A	#N/A	537.025	#N/A	#N/A	#N/A	537.091	#N/A	#N/A	#N/A	537.072	#N/A	#N/A	#N/A	592.425	#N/A	#N/A	#N/A	563.124	#N/A	#N/A	#N/A	618.532	#N/A	#N/A	#N/A
195	526.579	#N/A	#N/A	#N/A	526.61	#N/A	#N/A	#N/A	526.532	#N/A	#N/A	#N/A	526.598	#N/A	#N/A	#N/A	526.579	#N/A	#N/A	#N/A	579.841	#N/A	#N/A	#N/A	556.062	#N/A	#N/A	#N/A	609.379	#N/A	#N/A	#N/A
196	589.391	#N/A	#N/A	#N/A	589.422	#N/A	#N/A	#N/A	589.345	#N/A	#N/A	#N/A	589.41	#N/A	#N/A	#N/A	589.391	#N/A	#N/A	#N/A	649.109	#N/A	#N/A	#N/A	622.305	#N/A	#N/A	#N/A	682.077	#N/A	#N/A	#N/A
197	#N/A	622.411	#N/A	#N/A	#N/A	622.442	#N/A	#N/A	#N/A	622.365	#N/A	#N/A	#N/A	622.43	#N/A	#N/A	#N/A	622.462	#N/A	#N/A	#N/A	738.913	#N/A	#N/A	#N/A	658.747	#N/A	#N/A	#N/A	775.378	#N/A	#N/A
198	#N/A	#N/A	#N/A	193.112	#N/A	#N/A	#N/A	303.019	#N/A	#N/A	#N/A	111.149	#N/A	#N/A	#N/A	231.873	#N/A	#N/A	#N/A	201.955	#N/A	#N/A	#N/A	223.818	#N/A	#N/A	#N/A	256.854	#N/A	#N/A	#N/A	456.924
199	544.464	#N/A	#N/A	#N/A	544.495	#N/A	#N/A	#N/A	544.418	#N/A	#N/A	#N/A	544.484	#N/A	#N/A	#N/A	544.464	#N/A	#N/A	#N/A	599.812	#N/A	#N/A	#N/A	573.948	#N/A	#N/A	#N/A	629.35	#N/A	#N/A	#N/A
200	371.254	#N/A	#N/A	#N/A	371.285	#N/A	#N/A	#N/A	371.207	#N/A	#N/A	#N/A	371.273	#N/A	#N/A	#N/A	371.254	#N/A	#N/A	#N/A	408.848	#N/A	#N/A	#N/A	391.087	#N/A	#N/A	#N/A	428.735	#N/A	#N/A	#N/A
201	#N/A	265.453	#N/A	#N/A	#N/A	265.484	#N/A	#N/A	#N/A	265.407	#N/A	#N/A	#N/A	265.473	#N/A	#N/A	#N/A	265.607	#N/A	#N/A	#N/A	311.752	#N/A	#N/A	#N/A	286.631	#N/A	#N/A	#N/A	333.208	#N/A	#N/A
202	#N/A	#N/A	#N/A	177.702	#N/A	#N/A	#N/A	275.311	#N/A	#N/A	#N/A	104.895	#N/A	#N/A	#N/A	212.129	#N/A	#N/A	#N/A	186.522	#N/A	#N/A	#N/A	204.838	#N/A	#N/A	#N/A	236.705	#N/A	#N/A	#N/A	415.45
203	#N/A	#N/A	#N/A	168.791	#N/A	#N/A	#N/A	259.821	#N/A	#N/A	#N/A	100.881	#N/A	#N/A	#N/A	200.9	#N/A	#N/A	#N/A	177.595	#N/A	#N/A	#N/A	194.017	#N/A	#N/A	#N/A	224.951	#N/A	#N/A	#N/A	392.285
204	408.831	#N/A	#N/A	#N/A	408.862	#N/A	#N/A	#N/A	408.785	#N/A	#N/A	#N/A	408.85	#N/A	#N/A	#N/A	408.831	#N/A	#N/A	#N/A	450.321	#N/A	#N/A	#N/A	430.583	#N/A	#N/A	#N/A	472.127	#N/A	#N/A	#N/A
205	#N/A	#N/A	#N/A	151.373	#N/A	#N/A	#N/A	236.802	#N/A	#N/A	#N/A	87.6335	#N/A	#N/A	#N/A	181.508	#N/A	#N/A	#N/A	158.684	#N/A	#N/A	#N/A	174.973	#N/A	#N/A	#N/A	200.581	#N/A	#N/A	#N/A	356.036
206	492.128	#N/A	#N/A	#N/A	492.159	#N/A	#N/A	#N/A	492.082	#N/A	#N/A	#N/A	492.147	#N/A	#N/A	#N/A	492.128	#N/A	#N/A	#N/A	541.969	#N/A	#N/A	#N/A	519.258	#N/A	#N/A	#N/A	569.154	#N/A	#N/A	#N/A
207	401.021	#N/A	#N/A	#N/A	401.051	#N/A	#N/A	#N/A	400.974	#N/A	#N/A	#N/A	401.04	#N/A	#N/A	#N/A	401.021	#N/A	#N/A	#N/A	441.465	#N/A	#N/A	#N/A	423.307	#N/A	#N/A	#N/A	463.805	#N/A	#N/A	#N/A
208	#N/A	281.965	#N/A	#N/A	#N/A	281.996	#N/A	#N/A	#N/A	281.919	#N/A	#N/A	#N/A	281.984	#N/A	#N/A	#N/A	282.138	#N/A	#N/A	#N/A	331.36	#N/A	#N/A	#N/A	304.166	#N/A	#N/A	#N/A	353.867	#N/A	#N/A
209	444.665	#N/A	#N/A	#N/A	444.696	#N/A	#N/A	#N/A	444.619	#N/A	#N/A	#N/A	444.685	#N/A	#N/A	#N/A	444.665	#N/A	#N/A	#N/A	489.799	#N/A	#N/A	#N/A	468.531	#N/A	#N/A	#N/A	513.718	#N/A	#N/A	#N/A
210	408.536	#N/A	#N/A	#N/A	408.567	#N/A	#N/A	#N/A	408.49	#N/A	#N/A	#N/A	408.556	#N/A	#N/A	#N/A	408.536	#N/A	#N/A	#N/A	450.423	#N/A	#N/A	#N/A	428.585	#N/A	#N/A	#N/A	470.525	#N/A	#N/A	#N/A
211	544.318	#N/A	#N/A	#N/A	544.349	#N/A	#N/A	#N/A	544.271	#N/A	#N/A	#N/A	544.337	#N/A	#N/A	#N/A	544.318	#N/A	#N/A	#N/A	600.45	#N/A	#N/A	#N/A	570.494	#N/A	#N/A	#N/A	626.68	#N/A	#N/A	#N/A
212	544.451	#N/A	#N/A	#N/A	544.482	#N/A	#N/A	#N/A	544.405	#N/A	#N/A	#N/A	544.47	#N/A	#N/A	#N/A	544.451	#N/A	#N/A	#N/A	600.478	#N/A	#N/A	#N/A	571.147	#N/A	#N/A	#N/A	627.228	#N/A	#N/A	#N/A
213	#N/A	559.844	#N/A	#N/A	#N/A	559.875	#N/A	#N/A	#N/A	559.797	#N/A	#N/A	#N/A	559.863	#N/A	#N/A	#N/A	559.881	#N/A	#N/A	#N/A	666.116	#N/A	#N/A	#N/A	589.229	#N/A	#N/A	#N/A	695.612	#N/A	#N/A
214	#N/A	#N/A	#N/A	188.217	#N/A	#N/A	#N/A	309.788	#N/A	#N/A	#N/A	97.2779	#N/A	#N/A	#N/A	231.378	#N/A	#N/A	#N/A	196.635	#N/A	#N/A	#N/A	222.604	#N/A	#N/A	#N/A	250.373	#N/A	#N/A	#N/A	475.162
215	700.849	#N/A	#N/A	#N/A	700.88	#N/A	#N/A	#N/A	700.803	#N/A	#N/A	#N/A	700.869	#N/A	#N/A	#N/A	700.849	#N/A	#N/A	#N/A	773.614	#N/A	#N/A	#N/A	733.992	#N/A	#N/A	#N/A	806.81	#N/A	#N/A	#N/A
216	#N/A	634.032	#N/A	#N/A	#N/A	634.063	#N/A	#N/A	#N/A	633.986	#N/A	#N/A	#N/A	634.052	#N/A	#N/A	#N/A	634.07	#N/A	#N/A	#N/A	754.534	#N/A	#N/A	#N/A	667.687	#N/A	#N/A	#N/A	788.298	#N/A	#N/A
217	593.025	#N/A	#N/A	#N/A	593.056	#N/A	#N/A	#N/A	592.978	#N/A	#N/A	#N/A	593.044	#N/A	#N/A	#N/A	593.025	#N/A	#N/A	#N/A	654.505	#N/A	#N/A	#N/A	620.624	#N/A	#N/A	#N/A	682.158	#N/A	#N/A	#N/A
218	#N/A	572.398	#N/A	#N/A	#N/A	572.429	#N/A	#N/A	#N/A	572.352	#N/A	#N/A	#N/A	572.418	#N/A	#N/A	#N/A	572.435	#N/A	#N/A	#N/A	680.014	#N/A	#N/A	#N/A	604.973	#N/A	#N/A	#N/A	712.699	#N/A	#N/A
219	633.361	#N/A	#N/A	#N/A	633.391	#N/A	#N/A	#N/A	633.314	#N/A	#N/A	#N/A	633.38	#N/A	#N/A	#N/A	633.361	#N/A	#N/A	#N/A	698.401	#N/A	#N/A	#N/A	665.88	#N/A	#N/A	#N/A	730.974	#N/A	#N/A	#N/A
220	#N/A	581.659	#N/A	#N/A	#N/A	581.69	#N/A	#N/A	#N/A	581.613	#N/A	#N/A	#N/A	581.679	#N/A	#N/A	#N/A	581.696	#N/A	#N/A	#N/A	690.493	#N/A	#N/A	#N/A	616.059	#N/A	#N/A	#N/A	725.003	#N/A	#N/A
221	#N/A	#N/A	347.676	#N/A	#N/A	#N/A	479.923	#N/A	#N/A	#N/A	248.794	#N/A	#N/A	#N/A	394.616	#N/A	#N/A	#N/A	351.466	#N/A	#N/A	#N/A	412.859	#N/A	#N/A	#N/A	414.616	#N/A	#N/A	#N/A	660.719	#N/A
222	630.808	#N/A	#N/A	#N/A	630.839	#N/A	#N/A	#N/A	630.762	#N/A	#N/A	#N/A	630.827	#N/A	#N/A	#N/A	630.808	#N/A	#N/A	#N/A	696.544	#N/A	#N/A	#N/A	659.023	#N/A	#N/A	#N/A	724.812	#N/A	#N/A	#N/A
223	469.341	#N/A	#N/A	#N/A	469.372	#N/A	#N/A	#N/A	469.295	#N/A	#N/A	#N/A	469.36	#N/A	#N/A	#N/A	469.341	#N/A	#N/A	#N/A	516.798	#N/A	#N/A	#N/A	495.394	#N/A	#N/A	#N/A	542.905	#N/A	#N/A	#N/A
224	550.805	#N/A	#N/A	#N/A	550.836	#N/A	#N/A	#N/A	550.759	#N/A	#N/A	#N/A	550.824	#N/A	#N/A	#N/A	550.805	#N/A	#N/A	#N/A	607.361	#N/A	#N/A	#N/A	578.412	#N/A	#N/A	#N/A	635.022	#N/A	#N/A	#N/A
225	433.806	#N/A	#N/A	#N/A	433.836	#N/A	#N/A	#N/A	433.759	#N/A	#N/A	#N/A	433.825	#N/A	#N/A	#N/A	433.806	#N/A	#N/A	#N/A	478.534	#N/A	#N/A	#N/A	453.607	#N/A	#N/A	#N/A	498.389	#N/A	#N/A	#N/A
226	499.183	#N/A	#N/A	#N/A	499.214	#N/A	#N/A	#N/A	499.136	#N/A	#N/A	#N/A	499.202	#N/A	#N/A	#N/A	499.183	#N/A	#N/A	#N/A	550.479	#N/A	#N/A	#N/A	523.524	#N/A	#N/A	#N/A	574.874	#N/A	#N/A	#N/A
227	#N/A	387.169	#N/A	#N/A	#N/A	387.2	#N/A	#N/A	#N/A	387.122	#N/A	#N/A	#N/A	387.188	#N/A	#N/A	#N/A	387.316	#N/A	#N/A	#N/A	457.57	#N/A	#N/A	#N/A	412.997	#N/A	#N/A	#N/A	483.674	#N/A	#N/A
228	#N/A	#N/A	273.942	#N/A	#N/A	#N/A	337.606	#N/A	#N/A	#N/A	226.298	#N/A	#N/A	#N/A	296.551	#N/A	#N/A	#N/A	275.284	#N/A	#N/A	#N/A	328.44	#N/A	#N/A	#N/A	312.788	#N/A	#N/A	#N/A	453.353	#N/A
229	498.948	#N/A	#N/A	#N/A	498.979	#N/A	#N/A	#N/A	498.902	#N/A	#N/A	#N/A	498.968	#N/A	#N/A	#N/A	498.948	#N/A	#N/A	#N/A	550.303	#N/A	#N/A	#N/A	522.92	#N/A	#N/A	#N/A	574.329	#N/A	#N/A	#N/A
230	#N/A	351.75	#N/A	#N/A	#N/A	351.781	#N/A	#N/A	#N/A	351.704	#N/A	#N/A	#N/A	351.77	#N/A	#N/A	#N/A	351.898	#N/A	#N/A	#N/A	415.206	#N/A	#N/A	#N/A	375.896	#N/A	#N/A	#N/A	439.626	#N/A	#N/A
231	#N/A	#N/A	261.672	#N/A	#N/A	#N/A	325.089	#N/A	#N/A	#N/A	214.209	#N/A	#N/A	#N/A	284.193	#N/A	#N/A	#N/A	263.031	#N/A	#N/A	#N/A	312.314	#N/A	#N/A	#N/A	301.59	#N/A	#N/A	#N/A	437.979	#N/A
232	576	#N/A	#N/A	#N/A	576.031	#N/A	#N/A	#N/A	575.953	#N/A	#N/A	#N/A	576.019	#N/A	#N/A	#N/A	576	#N/A	#N/A	#N/A	636.052	#N/A	#N/A	#N/A	601.2	#N/A	#N/A	#N/A	661.307	#N/A	#N/A	#N/A
233	#N/A	#N/A	#N/A	178.07	#N/A	#N/A	#N/A	275.296	#N/A	#N/A	#N/A	105.548	#N/A	#N/A	#N/A	212.363	#N/A	#N/A	#N/A	186.867	#N/A	#N/A	#N/A	205.095	#N/A	#N/A	#N/A	237.316	#N/A	#N/A	#N/A	415.365
234	376.689	#N/A	#N/A	#N/A	376.72	#N/A	#N/A	#N/A	376.643	#N/A	#N/A	#N/A	376.708	#N/A	#N/A	#N/A	376.689	#N/A	#N/A	#N/A	414.802	#N/A	#N/A	#N/A	396.978	#N/A	#N/A	#N/A	435.145	#N/A	#N/A	#N/A
235	410.014	#N/A	#N/A	#N/A	410.045	#N/A	#N/A	#N/A	409.967	#N/A	#N/A	#N/A	410.033	#N/A	#N/A	#N/A	410.014	#N/A	#N/A	#N/A	451.347	#N/A	#N/A	#N/A	432.932	#N/A	#N/A	#N/A	474.319	#N/A	#N/A	#N/A
236	#N/A	275.558	#N/A	#N/A	#N/A	275.589	#N/A	#N/A	#N/A	275.512	#N/A	#N/A	#N/A	275.577	#N/A	#N/A	#N/A	275.711	#N/A	#N/A	#N/A	322.965	#N/A	#N/A	#N/A	299.036	#N/A	#N/A	#N/A	346.721	#N/A	#N/A
237	#N/A	#N/A	#N/A	156.355	#N/A	#N/A	#N/A	246.234	#N/A	#N/A	#N/A	89.3028	#N/A	#N/A	#N/A	188.059	#N/A	#N/A	#N/A	163.744	#N/A	#N/A	#N/A	181.247	#N/A	#N/A	#N/A	207.004	#N/A	#N/A	#N/A	370.277
238	#N/A	#N/A	205.567	#N/A	#N/A	#N/A	256.548	#N/A	#N/A	#N/A	167.517	#N/A	#N/A	#N/A	223.555	#N/A	#N/A	#N/A	206.832	#N/A	#N/A	#N/A	243.601	#N/A	#N/A	#N/A	238.339	#N/A	#N/A	#N/A	343.702	#N/A
239	342.993	#N/A	#N/A	#N/A	343.024	#N/A	#N/A	#N/A	342.947	#N/A	#N/A	#N/A	343.012	#N/A	#N/A	#N/A	342.993	#N/A	#N/A	#N/A	377.556	#N/A	#N/A	#N/A	361.784	#N/A	#N/A	#N/A	396.4	#N/A	#N/A	#N/A
240	390.258	#N/A	#N/A	#N/A	390.289	#N/A	#N/A	#N/A	390.211	#N/A	#N/A	#N/A	390.277	#N/A	#N/A	#N/A	390.258	#N/A	#N/A	#N/A	430.013	#N/A	#N/A	#N/A	410.306	#N/A	#N/A	#N/A	450.116	#N/A	#N/A	#N/A
241	404.238	#N/A	#N/A	#N/A	404.269	#N/A	#N/A	#N/A	404.192	#N/A	#N/A	#N/A	404.258	#N/A	#N/A	#N/A	404.238	#N/A	#N/A	#N/A	445.826	#N/A	#N/A	#N/A	423.488	#N/A	#N/A	#N/A	465.13	#N/A	#N/A	#N/A
242	450.613	#N/A	#N/A	#N/A	450.644	#N/A	#N/A	#N/A	450.566	#N/A	#N/A	#N/A	450.632	#N/A	#N/A	#N/A	450.613	#N/A	#N/A	#N/A	495.797	#N/A	#N/A	#N/A	477.019	#N/A	#N/A	#N/A	522.257	#N/A	#N/A	#N/A
243	#N/A	321.981	#N/A	#N/A	#N/A	322.011	#N/A	#N/A	#N/A	321.934	#N/A	#N/A	#N/A	322	#N/A	#N/A	#N/A	322.153	#N/A	#N/A	#N/A	377.667	#N/A	#N/A	#N/A	349.24	#N/A	#N/A	#N/A	405.232	#N/A	#N/A
244	551.797	#N/A	#N/A	#N/A	551.828	#N/A	#N/A	#N/A	551.751	#N/A	#N/A	#N/A	551.816	#N/A	#N/A	#N/A	551.797	#N/A	#N/A	#N/A	608.592	#N/A	#N/A	#N/A	578.938	#N/A	#N/A	#N/A	635.787	#N/A	#N/A	#N/A
245	#N/A	#N/A	#N/A	189.053	#N/A	#N/A	#N/A	266.631	#N/A	#N/A	#N/A	131.16	#N/A	#N/A	#N/A	216.422	#N/A	#N/A	#N/A	202.745	#N/A	#N/A	#N/A	210.375	#N/A	#N/A	#N/A	257.139	#N/A	#N/A	#N/A	408.321
246	429.227	#N/A	#N/A	#N/A	429.258	#N/A	#N/A	#N/A	429.181	#N/A	#N/A	#N/A	429.246	#N/A	#N/A	#N/A	429.227	#N/A	#N/A	#N/A	473.161	#N/A	#N/A	#N/A	450.149	#N/A	#N/A	#N/A	494.137	#N/A	#N/A	#N/A
247	468.008	#N/A	#N/A	#N/A	468.039	#N/A	#N/A	#N/A	467.962	#N/A	#N/A	#N/A	468.027	#N/A	#N/A	#N/A	468.008	#N/A	#N/A	#N/A	516.236	#N/A	#N/A	#N/A	489.909	#N/A	#N/A	#N/A	538.191	#N/A	#N/A	#N/A
248	540.163	#N/A	#N/A	#N/A	540.194	#N/A	#N/A	#N/A	540.117	#N/A	#N/A	#N/A	540.182	#N/A	#N/A	#N/A	540.163	#N/A	#N/A	#N/A	595.811	#N/A	#N/A	#N/A	566.339	#N/A	#N/A	#N/A	622.041	#N/A	#N/A	#N/A
249	470.608	#N/A	#N/A	#N/A	470.639	#N/A	#N/A	#N/A	470.562	#N/A	#N/A	#N/A	470.628	#N/A	#N/A	#N/A	470.608	#N/A	#N/A	#N/A	518.887	#N/A	#N/A	#N/A	493.597	#N/A	#N/A	#N/A	541.93	#N/A	#N/A	#N/A
250	412.408	#N/A	#N/A	#N/A	412.439	#N/A	#N/A	#N/A	412.362	#N/A	#N/A	#N/A	412.428	#N/A	#N/A	#N/A	412.408	#N/A	#N/A	#N/A	454.156	#N/A	#N/A	#N/A	434.79	#N/A	#N/A	#N/A	476.592	#N/A	#N/A	#N/A
251	#N/A	#N/A	#N/A	158.497	#N/A	#N/A	#N/A	267.653	#N/A	#N/A	#N/A	77.0913	#N/A	#N/A	#N/A	196.993	#N/A	#N/A	#N/A	162.547	#N/A	#N/A	#N/A	188.984	#N/A	#N/A	#N/A	206.427	#N/A	#N/A	#N/A	398.197
252	406.599	#N/A	#N/A	#N/A	406.63	#N/A	#N/A	#N/A	406.553	#N/A	#N/A	#N/A	406.618	#N/A	#N/A	#N/A	406.599	#N/A	#N/A	#N/A	448.833	#N/A	#N/A	#N/A	424.38	#N/A	#N/A	#N/A	466.668	#N/A	#N/A	#N/A
253	670.783	#N/A	#N/A	#N/A	670.814	#N/A	#N/A	#N/A	670.737	#N/A	#N/A	#N/A	670.802	#N/A	#N/A	#N/A	670.783	#N/A	#N/A	#N/A	742.594	#N/A	#N/A	#N/A	693.405	#N/A	#N/A	#N/A	765.27	#N/A	#N/A	#N/A
254	#N/A	#N/A	529.347	#N/A	#N/A	#N/A	607.185	#N/A	#N/A	#N/A	471.331	#N/A	#N/A	#N/A	556.793	#N/A	#N/A	#N/A	530.496	#N/A	#N/A	#N/A	653.978	#N/A	#N/A	#N/A	565.41	#N/A	#N/A	#N/A	792.492	#N/A
255	659.098	#N/A	#N/A	#N/A	659.129	#N/A	#N/A	#N/A	659.051	#N/A	#N/A	#N/A	659.117	#N/A	#N/A	#N/A	659.098	#N/A	#N/A	#N/A	729.546	#N/A	#N/A	#N/A	681.72	#N/A	#N/A	#N/A	752.222	#N/A	#N/A	#N/A
256	881.506	#N/A	#N/A	#N/A	881.537	#N/A	#N/A	#N/A	881.46	#N/A	#N/A	#N/A	881.526	#N/A	#N/A	#N/A	881.506	#N/A	#N/A	#N/A	974.663	#N/A	#N/A	#N/A	917.534	#N/A	#N/A	#N/A	1010.75	#N/A	#N/A	#N/A
257	555.053	#N/A	#N/A	#N/A	555.084	#N/A	#N/A	#N/A	555.006	#N/A	#N/A	#N/A	555.072	#N/A	#N/A	#N/A	555.053	#N/A	#N/A	#N/A	611.896	#N/A	#N/A	#N/A	583.554	#N/A	#N/A	#N/A	640.452	#N/A	#N/A	#N/A
258	#N/A	625.064	#N/A	#N/A	#N/A	625.095	#N/A	#N/A	#N/A	625.018	#N/A	#N/A	#N/A	625.083	#N/A	#N/A	#N/A	625.157	#N/A	#N/A	#N/A	743.805	#N/A	#N/A	#N/A	658.296	#N/A	#N/A	#N/A	777.231	#N/A	#N/A
259	#N/A	642.544	#N/A	#N/A	#N/A	642.575	#N/A	#N/A	#N/A	642.498	#N/A	#N/A	#N/A	642.563	#N/A	#N/A	#N/A	642.637	#N/A	#N/A	#N/A	763.631	#N/A	#N/A	#N/A	679.114	#N/A	#N/A	#N/A	800.395	#N/A	#N/A
260	#N/A	#N/A	#N/A	222.987	#N/A	#N/A	#N/A	344.464	#N/A	#N/A	#N/A	132.117	#N/A	#N/A	#N/A	266.114	#N/A	#N/A	#N/A	233.856	#N/A	#N/A	#N/A	257.346	#N/A	#N/A	#N/A	302.614	#N/A	#N/A	#N/A	530.92
261	460.912	#N/A	#N/A	#N/A	460.943	#N/A	#N/A	#N/A	460.866	#N/A	#N/A	#N/A	460.931	#N/A	#N/A	#N/A	460.912	#N/A	#N/A	#N/A	508.06	#N/A	#N/A	#N/A	483.901	#N/A	#N/A	#N/A	531.103	#N/A	#N/A	#N/A
262	490.685	#N/A	#N/A	#N/A	490.716	#N/A	#N/A	#N/A	490.639	#N/A	#N/A	#N/A	490.705	#N/A	#N/A	#N/A	490.685	#N/A	#N/A	#N/A	541.305	#N/A	#N/A	#N/A	513.674	#N/A	#N/A	#N/A	564.348	#N/A	#N/A	#N/A
263	#N/A	480.071	#N/A	#N/A	#N/A	480.102	#N/A	#N/A	#N/A	480.024	#N/A	#N/A	#N/A	480.09	#N/A	#N/A	#N/A	480.152	#N/A	#N/A	#N/A	569.406	#N/A	#N/A	#N/A	508.658	#N/A	#N/A	#N/A	598.17	#N/A	#N/A
264	586.144	#N/A	#N/A	#N/A	586.175	#N/A	#N/A	#N/A	586.098	#N/A	#N/A	#N/A	586.164	#N/A	#N/A	#N/A	586.144	#N/A	#N/A	#N/A	646.334	#N/A	#N/A	#N/A	615.845	#N/A	#N/A	#N/A	676.089	#N/A	#N/A	#N/A
265	579.737	#N/A	#N/A	#N/A	579.768	#N/A	#N/A	#N/A	579.69	#N/A	#N/A	#N/A	579.756	#N/A	#N/A	#N/A	579.737	#N/A	#N/A	#N/A	639.941	#N/A	#N/A	#N/A	606.16	#N/A	#N/A	#N/A	666.418	#N/A	#N/A	#N/A
266	#N/A	457.156	#N/A	#N/A	#N/A	457.187	#N/A	#N/A	#N/A	457.11	#N/A	#N/A	#N/A	457.176	#N/A	#N/A	#N/A	457.266	#N/A	#N/A	#N/A	541.605	#N/A	#N/A	#N/A	485.524	#N/A	#N/A	#N/A	570.186	#N/A	#N/A
267	515.656	#N/A	#N/A	#N/A	515.687	#N/A	#N/A	#N/A	515.61	#N/A	#N/A	#N/A	515.675	#N/A	#N/A	#N/A	515.656	#N/A	#N/A	#N/A	567.891	#N/A	#N/A	#N/A	544.168	#N/A	#N/A	#N/A	596.457	#N/A	#N/A	#N/A
268	444.239	#N/A	#N/A	#N/A	444.27	#N/A	#N/A	#N/A	444.193	#N/A	#N/A	#N/A	444.258	#N/A	#N/A	#N/A	444.239	#N/A	#N/A	#N/A	489.166	#N/A	#N/A	#N/A	468.723	#N/A	#N/A	#N/A	513.704	#N/A	#N/A	#N/A
269	#N/A	507.065	#N/A	#N/A	#N/A	507.096	#N/A	#N/A	#N/A	507.019	#N/A	#N/A	#N/A	507.084	#N/A	#N/A	#N/A	507.174	#N/A	#N/A	#N/A	601.519	#N/A	#N/A	#N/A	537.146	#N/A	#N/A	#N/A	631.814	#N/A	#N/A
270	499.458	#N/A	#N/A	#N/A	499.489	#N/A	#N/A	#N/A	499.412	#N/A	#N/A	#N/A	499.478	#N/A	#N/A	#N/A	499.458	#N/A	#N/A	#N/A	550.348	#N/A	#N/A	#N/A	525.823	#N/A	#N/A	#N/A	576.767	#N/A	#N/A	#N/A
271	#N/A	#N/A	#N/A	219.496	#N/A	#N/A	#N/A	333.153	#N/A	#N/A	#N/A	134.739	#N/A	#N/A	#N/A	259.578	#N/A	#N/A	#N/A	229.993	#N/A	#N/A	#N/A	251.29	#N/A	#N/A	#N/A	294.677	#N/A	#N/A	#N/A	503.66
272	#N/A	#N/A	#N/A	220.921	#N/A	#N/A	#N/A	326.415	#N/A	#N/A	#N/A	142.242	#N/A	#N/A	#N/A	258.126	#N/A	#N/A	#N/A	233.662	#N/A	#N/A	#N/A	250.345	#N/A	#N/A	#N/A	298.329	#N/A	#N/A	#N/A	496.456
273	523.802	#N/A	#N/A	#N/A	523.833	#N/A	#N/A	#N/A	523.756	#N/A	#N/A	#N/A	523.821	#N/A	#N/A	#N/A	523.802	#N/A	#N/A	#N/A	577.609	#N/A	#N/A	#N/A	549.855	#N/A	#N/A	#N/A	603.715	#N/A	#N/A	#N/A
274	543.554	#N/A	#N/A	#N/A	543.585	#N/A	#N/A	#N/A	543.507	#N/A	#N/A	#N/A	543.573	#N/A	#N/A	#N/A	543.554	#N/A	#N/A	#N/A	598.796	#N/A	#N/A	#N/A	573.037	#N/A	#N/A	#N/A	628.333	#N/A	#N/A	#N/A
275	#N/A	590.594	#N/A	#N/A	#N/A	590.625	#N/A	#N/A	#N/A	590.548	#N/A	#N/A	#N/A	590.614	#N/A	#N/A	#N/A	590.704	#N/A	#N/A	#N/A	701.775	#N/A	#N/A	#N/A	623.586	#N/A	#N/A	#N/A	734.981	#N/A	#N/A
276	715.64	#N/A	#N/A	#N/A	715.671	#N/A	#N/A	#N/A	715.594	#N/A	#N/A	#N/A	715.66	#N/A	#N/A	#N/A	715.64	#N/A	#N/A	#N/A	790.078	#N/A	#N/A	#N/A	748.555	#N/A	#N/A	#N/A	823.047	#N/A	#N/A	#N/A
277	#N/A	581.327	#N/A	#N/A	#N/A	581.358	#N/A	#N/A	#N/A	581.28	#N/A	#N/A	#N/A	581.346	#N/A	#N/A	#N/A	581.436	#N/A	#N/A	#N/A	690.708	#N/A	#N/A	#N/A	613.877	#N/A	#N/A	#N/A	723.472	#N/A	#N/A
278	770.579	#N/A	#N/A	#N/A	770.61	#N/A	#N/A	#N/A	770.533	#N/A	#N/A	#N/A	770.599	#N/A	#N/A	#N/A	770.579	#N/A	#N/A	#N/A	851.844	#N/A	#N/A	#N/A	801.829	#N/A	#N/A	#N/A	883.148	#N/A	#N/A	#N/A
279	#N/A	495.019	#N/A	#N/A	#N/A	495.05	#N/A	#N/A	#N/A	494.973	#N/A	#N/A	#N/A	495.039	#N/A	#N/A	#N/A	495.129	#N/A	#N/A	#N/A	587.109	#N/A	#N/A	#N/A	524.581	#N/A	#N/A	#N/A	616.884	#N/A	#N/A
280	#N/A	#N/A	#N/A	183.069	#N/A	#N/A	#N/A	282.431	#N/A	#N/A	#N/A	108.956	#N/A	#N/A	#N/A	218.114	#N/A	#N/A	#N/A	191.416	#N/A	#N/A	#N/A	210.714	#N/A	#N/A	#N/A	244.208	#N/A	#N/A	#N/A	425.299
281	#N/A	#N/A	#N/A	221.991	#N/A	#N/A	#N/A	338.697	#N/A	#N/A	#N/A	134.964	#N/A	#N/A	#N/A	263.147	#N/A	#N/A	#N/A	232.45	#N/A	#N/A	#N/A	254.67	#N/A	#N/A	#N/A	297.737	#N/A	#N/A	#N/A	511.941
282	444.98	#N/A	#N/A	#N/A	445.011	#N/A	#N/A	#N/A	444.933	#N/A	#N/A	#N/A	444.999	#N/A	#N/A	#N/A	444.98	#N/A	#N/A	#N/A	489.597	#N/A	#N/A	#N/A	471.033	#N/A	#N/A	#N/A	515.703	#N/A	#N/A	#N/A
283	458.562	#N/A	#N/A	#N/A	458.593	#N/A	#N/A	#N/A	458.515	#N/A	#N/A	#N/A	458.581	#N/A	#N/A	#N/A	458.562	#N/A	#N/A	#N/A	504.762	#N/A	#N/A	#N/A	484.614	#N/A	#N/A	#N/A	530.869	#N/A	#N/A	#N/A
284	#N/A	458.235	#N/A	#N/A	#N/A	458.266	#N/A	#N/A	#N/A	458.189	#N/A	#N/A	#N/A	458.254	#N/A	#N/A	#N/A	458.331	#N/A	#N/A	#N/A	541.19	#N/A	#N/A	#N/A	490.276	#N/A	#N/A	#N/A	573.425	#N/A	#N/A
285	#N/A	#N/A	325.025	#N/A	#N/A	#N/A	433.045	#N/A	#N/A	#N/A	244.497	#N/A	#N/A	#N/A	363.114	#N/A	#N/A	#N/A	327.669	#N/A	#N/A	#N/A	384.027	#N/A	#N/A	#N/A	385.002	#N/A	#N/A	#N/A	587.413	#N/A
286	488.596	#N/A	#N/A	#N/A	488.627	#N/A	#N/A	#N/A	488.55	#N/A	#N/A	#N/A	488.616	#N/A	#N/A	#N/A	488.596	#N/A	#N/A	#N/A	539.088	#N/A	#N/A	#N/A	511.088	#N/A	#N/A	#N/A	561.634	#N/A	#N/A	#N/A
287	#N/A	#N/A	350.207	#N/A	#N/A	#N/A	412.408	#N/A	#N/A	#N/A	303.665	#N/A	#N/A	#N/A	372.294	#N/A	#N/A	#N/A	352.168	#N/A	#N/A	#N/A	423.584	#N/A	#N/A	#N/A	391.492	#N/A	#N/A	#N/A	550.024	#N/A
288	460.402	#N/A	#N/A	#N/A	460.433	#N/A	#N/A	#N/A	460.356	#N/A	#N/A	#N/A	460.422	#N/A	#N/A	#N/A	460.402	#N/A	#N/A	#N/A	507.94	#N/A	#N/A	#N/A	481.461	#N/A	#N/A	#N/A	529.052	#N/A	#N/A	#N/A
289	474.645	#N/A	#N/A	#N/A	474.676	#N/A	#N/A	#N/A	474.599	#N/A	#N/A	#N/A	474.665	#N/A	#N/A	#N/A	474.645	#N/A	#N/A	#N/A	523.589	#N/A	#N/A	#N/A	497.267	#N/A	#N/A	#N/A	546.265	#N/A	#N/A	#N/A
290	320.296	#N/A	#N/A	#N/A	320.327	#N/A	#N/A	#N/A	320.25	#N/A	#N/A	#N/A	320.316	#N/A	#N/A	#N/A	320.296	#N/A	#N/A	#N/A	352.891	#N/A	#N/A	#N/A	336.405	#N/A	#N/A	#N/A	369.054	#N/A	#N/A	#N/A
291	458.275	#N/A	#N/A	#N/A	458.306	#N/A	#N/A	#N/A	458.229	#N/A	#N/A	#N/A	458.295	#N/A	#N/A	#N/A	458.275	#N/A	#N/A	#N/A	505.563	#N/A	#N/A	#N/A	479.896	#N/A	#N/A	#N/A	527.238	#N/A	#N/A	#N/A
292	504.608	#N/A	#N/A	#N/A	504.639	#N/A	#N/A	#N/A	504.561	#N/A	#N/A	#N/A	504.627	#N/A	#N/A	#N/A	504.608	#N/A	#N/A	#N/A	556.513	#N/A	#N/A	#N/A	529.048	#N/A	#N/A	#N/A	581.008	#N/A	#N/A	#N/A
293	505.054	#N/A	#N/A	#N/A	505.085	#N/A	#N/A	#N/A	505.007	#N/A	#N/A	#N/A	505.073	#N/A	#N/A	#N/A	505.054	#N/A	#N/A	#N/A	556.959	#N/A	#N/A	#N/A	529.718	#N/A	#N/A	#N/A	581.677	#N/A	#N/A	#N/A
294	557.385	#N/A	#N/A	#N/A	557.416	#N/A	#N/A	#N/A	557.338	#N/A	#N/A	#N/A	557.404	#N/A	#N/A	#N/A	557.385	#N/A	#N/A	#N/A	614.471	#N/A	#N/A	#N/A	586.01	#N/A	#N/A	#N/A	643.151	#N/A	#N/A	#N/A
295	769.35	#N/A	#N/A	#N/A	769.381	#N/A	#N/A	#N/A	769.304	#N/A	#N/A	#N/A	769.369	#N/A	#N/A	#N/A	769.35	#N/A	#N/A	#N/A	848.974	#N/A	#N/A	#N/A	807.346	#N/A	#N/A	#N/A	887.023	#N/A	#N/A	#N/A
296	784.926	#N/A	#N/A	#N/A	784.957	#N/A	#N/A	#N/A	784.879	#N/A	#N/A	#N/A	784.945	#N/A	#N/A	#N/A	784.926	#N/A	#N/A	#N/A	866.56	#N/A	#N/A	#N/A	822.082	#N/A	#N/A	#N/A	903.771	#N/A	#N/A	#N/A
297	616.486	#N/A	#N/A	#N/A	616.517	#N/A	#N/A	#N/A	616.44	#N/A	#N/A	#N/A	616.505	#N/A	#N/A	#N/A	616.486	#N/A	#N/A	#N/A	680.217	#N/A	#N/A	#N/A	646.173	#N/A	#N/A	#N/A	709.958	#N/A	#N/A	#N/A
298	554.366	#N/A	#N/A	#N/A	554.397	#N/A	#N/A	#N/A	554.32	#N/A	#N/A	#N/A	554.386	#N/A	#N/A	#N/A	554.366	#N/A	#N/A	#N/A	610.827	#N/A	#N/A	#N/A	584.169	#N/A	#N/A	#N/A	640.684	#N/A	#N/A	#N/A
299	412.923	#N/A	#N/A	#N/A	412.954	#N/A	#N/A	#N/A	412.877	#N/A	#N/A	#N/A	412.942	#N/A	#N/A	#N/A	412.923	#N/A	#N/A	#N/A	454.239	#N/A	#N/A	#N/A	436.933	#N/A	#N/A	#N/A	478.303	#N/A	#N/A	#N/A
300	702.166	#N/A	#N/A	#N/A	702.197	#N/A	#N/A	#N/A	702.12	#N/A	#N/A	#N/A	702.186	#N/A	#N/A	#N/A	702.166	#N/A	#N/A	#N/A	774.481	#N/A	#N/A	#N/A	737.904	#N/A	#N/A	#N/A	810.273	#N/A	#N/A	#N/A
301	535.152	#N/A	#N/A	#N/A	535.183	#N/A	#N/A	#N/A	535.106	#N/A	#N/A	#N/A	535.172	#N/A	#N/A	#N/A	535.152	#N/A	#N/A	#N/A	590.282	#N/A	#N/A	#N/A	561.205	#N/A	#N/A	#N/A	616.389	#N/A	#N/A	#N/A
302	490.182	#N/A	#N/A	#N/A	490.213	#N/A	#N/A	#N/A	490.136	#N/A	#N/A	#N/A	490.202	#N/A	#N/A	#N/A	490.182	#N/A	#N/A	#N/A	540.069	#N/A	#N/A	#N/A	516.235	#N/A	#N/A	#N/A	566.176	#N/A	#N/A	#N/A
303	394.036	#N/A	#N/A	#N/A	394.067	#N/A	#N/A	#N/A	393.989	#N/A	#N/A	#N/A	394.055	#N/A	#N/A	#N/A	394.036	#N/A	#N/A	#N/A	433.684	#N/A	#N/A	#N/A	416.247	#N/A	#N/A	#N/A	455.95	#N/A	#N/A	#N/A
304	#N/A	#N/A	#N/A	189.492	#N/A	#N/A	#N/A	294.033	#N/A	#N/A	#N/A	111.523	#N/A	#N/A	#N/A	226.362	#N/A	#N/A	#N/A	199.033	#N/A	#N/A	#N/A	218.64	#N/A	#N/A	#N/A	252.596	#N/A	#N/A	#N/A	444.397
305	644.653	#N/A	#N/A	#N/A	644.684	#N/A	#N/A	#N/A	644.607	#N/A	#N/A	#N/A	644.673	#N/A	#N/A	#N/A	644.653	#N/A	#N/A	#N/A	712.55	#N/A	#N/A	#N/A	670.706	#N/A	#N/A	#N/A	738.657	#N/A	#N/A	#N/A
306	374.076	#N/A	#N/A	#N/A	374.107	#N/A	#N/A	#N/A	374.03	#N/A	#N/A	#N/A	374.096	#N/A	#N/A	#N/A	374.076	#N/A	#N/A	#N/A	411.945	#N/A	#N/A	#N/A	394.125	#N/A	#N/A	#N/A	432.048	#N/A	#N/A	#N/A
307	#N/A	#N/A	#N/A	149.439	#N/A	#N/A	#N/A	241.769	#N/A	#N/A	#N/A	80.562	#N/A	#N/A	#N/A	182.006	#N/A	#N/A	#N/A	155.234	#N/A	#N/A	#N/A	175.042	#N/A	#N/A	#N/A	196.429	#N/A	#N/A	#N/A	361.616
308	510.665	#N/A	#N/A	#N/A	510.696	#N/A	#N/A	#N/A	510.618	#N/A	#N/A	#N/A	510.684	#N/A	#N/A	#N/A	510.665	#N/A	#N/A	#N/A	562.94	#N/A	#N/A	#N/A	536.717	#N/A	#N/A	#N/A	589.046	#N/A	#N/A	#N/A
309	530.319	#N/A	#N/A	#N/A	530.35	#N/A	#N/A	#N/A	530.273	#N/A	#N/A	#N/A	530.338	#N/A	#N/A	#N/A	530.319	#N/A	#N/A	#N/A	584.434	#N/A	#N/A	#N/A	558.156	#N/A	#N/A	#N/A	612.325	#N/A	#N/A	#N/A
310	395.844	#N/A	#N/A	#N/A	395.875	#N/A	#N/A	#N/A	395.797	#N/A	#N/A	#N/A	395.863	#N/A	#N/A	#N/A	395.844	#N/A	#N/A	#N/A	434.7	#N/A	#N/A	#N/A	422.019	#N/A	#N/A	#N/A	460.93	#N/A	#N/A	#N/A
311	377.934	#N/A	#N/A	#N/A	377.965	#N/A	#N/A	#N/A	377.888	#N/A	#N/A	#N/A	377.953	#N/A	#N/A	#N/A	377.934	#N/A	#N/A	#N/A	415.771	#N/A	#N/A	#N/A	399.886	#N/A	#N/A	#N/A	437.777	#N/A	#N/A	#N/A
312	353.032	#N/A	#N/A	#N/A	353.063	#N/A	#N/A	#N/A	352.986	#N/A	#N/A	#N/A	353.051	#N/A	#N/A	#N/A	353.032	#N/A	#N/A	#N/A	388.463	#N/A	#N/A	#N/A	373.017	#N/A	#N/A	#N/A	408.502	#N/A	#N/A	#N/A
313	560.974	#N/A	#N/A	#N/A	561.005	#N/A	#N/A	#N/A	560.928	#N/A	#N/A	#N/A	560.994	#N/A	#N/A	#N/A	560.974	#N/A	#N/A	#N/A	619.115	#N/A	#N/A	#N/A	587.027	#N/A	#N/A	#N/A	645.222	#N/A	#N/A	#N/A
314	969.165	#N/A	#N/A	#N/A	969.196	#N/A	#N/A	#N/A	969.119	#N/A	#N/A	#N/A	969.185	#N/A	#N/A	#N/A	969.165	#N/A	#N/A	#N/A	1075.77	#N/A	#N/A	#N/A	991.787	#N/A	#N/A	#N/A	1098.44	#N/A	#N/A	#N/A
315	#N/A	#N/A	#N/A	249.367	#N/A	#N/A	#N/A	391.425	#N/A	#N/A	#N/A	143.127	#N/A	#N/A	#N/A	299.795	#N/A	#N/A	#N/A	263.405	#N/A	#N/A	#N/A	289.725	#N/A	#N/A	#N/A	337.924	#N/A	#N/A	#N/A	607.381
316	#N/A	#N/A	#N/A	252.711	#N/A	#N/A	#N/A	390.581	#N/A	#N/A	#N/A	149.599	#N/A	#N/A	#N/A	301.653	#N/A	#N/A	#N/A	266.833	#N/A	#N/A	#N/A	291.848	#N/A	#N/A	#N/A	343.825	#N/A	#N/A	#N/A	606.001
317	569.617	#N/A	#N/A	#N/A	569.648	#N/A	#N/A	#N/A	569.571	#N/A	#N/A	#N/A	569.636	#N/A	#N/A	#N/A	569.617	#N/A	#N/A	#N/A	628.397	#N/A	#N/A	#N/A	597.093	#N/A	#N/A	#N/A	655.927	#N/A	#N/A	#N/A
318	414.185	#N/A	#N/A	#N/A	414.216	#N/A	#N/A	#N/A	414.139	#N/A	#N/A	#N/A	414.205	#N/A	#N/A	#N/A	414.185	#N/A	#N/A	#N/A	456.626	#N/A	#N/A	#N/A	433.987	#N/A	#N/A	#N/A	476.481	#N/A	#N/A	#N/A
319	#N/A	#N/A	297.011	#N/A	#N/A	#N/A	334.702	#N/A	#N/A	#N/A	268.788	#N/A	#N/A	#N/A	310.402	#N/A	#N/A	#N/A	297.868	#N/A	#N/A	#N/A	359.852	#N/A	#N/A	#N/A	327.586	#N/A	#N/A	#N/A	441.406	#N/A
320	433.728	#N/A	#N/A	#N/A	433.759	#N/A	#N/A	#N/A	433.682	#N/A	#N/A	#N/A	433.747	#N/A	#N/A	#N/A	433.728	#N/A	#N/A	#N/A	478.005	#N/A	#N/A	#N/A	455.432	#N/A	#N/A	#N/A	499.763	#N/A	#N/A	#N/A
321	459.385	#N/A	#N/A	#N/A	459.416	#N/A	#N/A	#N/A	459.339	#N/A	#N/A	#N/A	459.405	#N/A	#N/A	#N/A	459.385	#N/A	#N/A	#N/A	506.576	#N/A	#N/A	#N/A	481.424	#N/A	#N/A	#N/A	528.669	#N/A	#N/A	#N/A
322	#N/A	#N/A	#N/A	161.95	#N/A	#N/A	#N/A	258.409	#N/A	#N/A	#N/A	89.7637	#N/A	#N/A	#N/A	196.203	#N/A	#N/A	#N/A	169.033	#N/A	#N/A	#N/A	189.018	#N/A	#N/A	#N/A	216.181	#N/A	#N/A	#N/A	394.565
323	515.692	#N/A	#N/A	#N/A	515.723	#N/A	#N/A	#N/A	515.645	#N/A	#N/A	#N/A	515.711	#N/A	#N/A	#N/A	515.692	#N/A	#N/A	#N/A	570.071	#N/A	#N/A	#N/A	535.74	#N/A	#N/A	#N/A	590.174	#N/A	#N/A	#N/A
324	400.728	#N/A	#N/A	#N/A	400.758	#N/A	#N/A	#N/A	400.681	#N/A	#N/A	#N/A	400.747	#N/A	#N/A	#N/A	400.728	#N/A	#N/A	#N/A	441.053	#N/A	#N/A	#N/A	423.349	#N/A	#N/A	#N/A	463.729	#N/A	#N/A	#N/A
325	423.907	#N/A	#N/A	#N/A	423.938	#N/A	#N/A	#N/A	423.86	#N/A	#N/A	#N/A	423.926	#N/A	#N/A	#N/A	423.907	#N/A	#N/A	#N/A	466.066	#N/A	#N/A	#N/A	449.959	#N/A	#N/A	#N/A	492.173	#N/A	#N/A	#N/A
326	548.708	#N/A	#N/A	#N/A	548.739	#N/A	#N/A	#N/A	548.662	#N/A	#N/A	#N/A	548.727	#N/A	#N/A	#N/A	548.708	#N/A	#N/A	#N/A	606.194	#N/A	#N/A	#N/A	571.695	#N/A	#N/A	#N/A	629.235	#N/A	#N/A	#N/A
327	#N/A	#N/A	#N/A	181.504	#N/A	#N/A	#N/A	277.686	#N/A	#N/A	#N/A	109.526	#N/A	#N/A	#N/A	215.659	#N/A	#N/A	#N/A	191.671	#N/A	#N/A	#N/A	208.492	#N/A	#N/A	#N/A	245.609	#N/A	#N/A	#N/A	428.133
328	#N/A	#N/A	#N/A	152.861	#N/A	#N/A	#N/A	233.612	#N/A	#N/A	#N/A	92.4056	#N/A	#N/A	#N/A	181.542	#N/A	#N/A	#N/A	161.095	#N/A	#N/A	#N/A	175.351	#N/A	#N/A	#N/A	205.82	#N/A	#N/A	#N/A	358.159
329	#N/A	#N/A	#N/A	143.791	#N/A	#N/A	#N/A	221.996	#N/A	#N/A	#N/A	85.4305	#N/A	#N/A	#N/A	171.38	#N/A	#N/A	#N/A	151.451	#N/A	#N/A	#N/A	165.294	#N/A	#N/A	#N/A	190.893	#N/A	#N/A	#N/A	334.349
330	#N/A	#N/A	#N/A	177.998	#N/A	#N/A	#N/A	264.904	#N/A	#N/A	#N/A	113.158	#N/A	#N/A	#N/A	208.653	#N/A	#N/A	#N/A	189.933	#N/A	#N/A	#N/A	202.027	#N/A	#N/A	#N/A	239.194	#N/A	#N/A	#N/A	403.962
331	#N/A	#N/A	#N/A	198.671	#N/A	#N/A	#N/A	298.522	#N/A	#N/A	#N/A	124.193	#N/A	#N/A	#N/A	233.888	#N/A	#N/A	#N/A	210.604	#N/A	#N/A	#N/A	226.458	#N/A	#N/A	#N/A	266.908	#N/A	#N/A	#N/A	454.085
332	#N/A	#N/A	#N/A	166.319	#N/A	#N/A	#N/A	250.136	#N/A	#N/A	#N/A	103.779	#N/A	#N/A	#N/A	195.886	#N/A	#N/A	#N/A	175.868	#N/A	#N/A	#N/A	189.451	#N/A	#N/A	#N/A	222.725	#N/A	#N/A	#N/A	378.661
333	741.967	#N/A	#N/A	#N/A	741.998	#N/A	#N/A	#N/A	741.921	#N/A	#N/A	#N/A	741.987	#N/A	#N/A	#N/A	741.967	#N/A	#N/A	#N/A	819.663	#N/A	#N/A	#N/A	774.518	#N/A	#N/A	#N/A	852.267	#N/A	#N/A	#N/A
334	664.925	#N/A	#N/A	#N/A	664.956	#N/A	#N/A	#N/A	664.879	#N/A	#N/A	#N/A	664.944	#N/A	#N/A	#N/A	664.925	#N/A	#N/A	#N/A	732.898	#N/A	#N/A	#N/A	700.663	#N/A	#N/A	#N/A	768.689	#N/A	#N/A	#N/A
335	487.552	#N/A	#N/A	#N/A	487.583	#N/A	#N/A	#N/A	487.506	#N/A	#N/A	#N/A	487.571	#N/A	#N/A	#N/A	487.552	#N/A	#N/A	#N/A	537.806	#N/A	#N/A	#N/A	510.541	#N/A	#N/A	#N/A	560.849	#N/A	#N/A	#N/A
336	#N/A	349.175	#N/A	#N/A	#N/A	349.206	#N/A	#N/A	#N/A	349.129	#N/A	#N/A	#N/A	349.195	#N/A	#N/A	#N/A	349.361	#N/A	#N/A	#N/A	411.096	#N/A	#N/A	#N/A	375.585	#N/A	#N/A	#N/A	437.838	#N/A	#N/A
337	#N/A	#N/A	257.044	#N/A	#N/A	#N/A	324.133	#N/A	#N/A	#N/A	206.836	#N/A	#N/A	#N/A	280.869	#N/A	#N/A	#N/A	258.807	#N/A	#N/A	#N/A	306.675	#N/A	#N/A	#N/A	297.116	#N/A	#N/A	#N/A	437.944	#N/A
338	512.49	#N/A	#N/A	#N/A	512.521	#N/A	#N/A	#N/A	512.444	#N/A	#N/A	#N/A	512.509	#N/A	#N/A	#N/A	512.49	#N/A	#N/A	#N/A	564.98	#N/A	#N/A	#N/A	538.371	#N/A	#N/A	#N/A	590.915	#N/A	#N/A	#N/A
339	#N/A	405.585	#N/A	#N/A	#N/A	405.616	#N/A	#N/A	#N/A	405.539	#N/A	#N/A	#N/A	405.605	#N/A	#N/A	#N/A	405.748	#N/A	#N/A	#N/A	479.436	#N/A	#N/A	#N/A	432.665	#N/A	#N/A	#N/A	506.815	#N/A	#N/A
340	#N/A	#N/A	#N/A	169.074	#N/A	#N/A	#N/A	267.655	#N/A	#N/A	#N/A	95.3032	#N/A	#N/A	#N/A	204.08	#N/A	#N/A	#N/A	176.019	#N/A	#N/A	#N/A	196.76	#N/A	#N/A	#N/A	226.436	#N/A	#N/A	#N/A	408.365
341	705.82	#N/A	#N/A	#N/A	705.851	#N/A	#N/A	#N/A	705.774	#N/A	#N/A	#N/A	705.839	#N/A	#N/A	#N/A	705.82	#N/A	#N/A	#N/A	780.18	#N/A	#N/A	#N/A	734.586	#N/A	#N/A	#N/A	809.001	#N/A	#N/A	#N/A
342	#N/A	#N/A	#N/A	162.51	#N/A	#N/A	#N/A	259.013	#N/A	#N/A	#N/A	90.2926	#N/A	#N/A	#N/A	196.779	#N/A	#N/A	#N/A	169.594	#N/A	#N/A	#N/A	189.591	#N/A	#N/A	#N/A	217.014	#N/A	#N/A	#N/A	395.474
343	418.469	#N/A	#N/A	#N/A	418.5	#N/A	#N/A	#N/A	418.423	#N/A	#N/A	#N/A	418.489	#N/A	#N/A	#N/A	418.469	#N/A	#N/A	#N/A	461.233	#N/A	#N/A	#N/A	439.031	#N/A	#N/A	#N/A	481.848	#N/A	#N/A	#N/A
344	#N/A	325.847	#N/A	#N/A	#N/A	325.878	#N/A	#N/A	#N/A	325.8	#N/A	#N/A	#N/A	325.866	#N/A	#N/A	#N/A	325.935	#N/A	#N/A	#N/A	385.195	#N/A	#N/A	#N/A	346.505	#N/A	#N/A	#N/A	406.04	#N/A	#N/A
345	503.154	#N/A	#N/A	#N/A	503.185	#N/A	#N/A	#N/A	503.107	#N/A	#N/A	#N/A	503.173	#N/A	#N/A	#N/A	503.154	#N/A	#N/A	#N/A	554.636	#N/A	#N/A	#N/A	528.686	#N/A	#N/A	#N/A	580.222	#N/A	#N/A	#N/A
346	#N/A	382.698	#N/A	#N/A	#N/A	382.729	#N/A	#N/A	#N/A	382.651	#N/A	#N/A	#N/A	382.717	#N/A	#N/A	#N/A	382.883	#N/A	#N/A	#N/A	451.715	#N/A	#N/A	#N/A	409.49	#N/A	#N/A	#N/A	478.84	#N/A	#N/A
347	418.904	#N/A	#N/A	#N/A	418.935	#N/A	#N/A	#N/A	418.858	#N/A	#N/A	#N/A	418.923	#N/A	#N/A	#N/A	418.904	#N/A	#N/A	#N/A	461.556	#N/A	#N/A	#N/A	440.162	#N/A	#N/A	#N/A	482.868	#N/A	#N/A	#N/A
348	#N/A	339.536	#N/A	#N/A	#N/A	339.567	#N/A	#N/A	#N/A	339.49	#N/A	#N/A	#N/A	339.556	#N/A	#N/A	#N/A	339.627	#N/A	#N/A	#N/A	401.197	#N/A	#N/A	#N/A	361.71	#N/A	#N/A	#N/A	423.56	#N/A	#N/A
349	#N/A	#N/A	230.749	#N/A	#N/A	#N/A	294.516	#N/A	#N/A	#N/A	183.017	#N/A	#N/A	#N/A	253.397	#N/A	#N/A	#N/A	232.512	#N/A	#N/A	#N/A	273.917	#N/A	#N/A	#N/A	269.235	#N/A	#N/A	#N/A	399.13	#N/A
350	#N/A	623.182	#N/A	#N/A	#N/A	623.213	#N/A	#N/A	#N/A	623.136	#N/A	#N/A	#N/A	623.202	#N/A	#N/A	#N/A	623.368	#N/A	#N/A	#N/A	739.051	#N/A	#N/A	#N/A	662.124	#N/A	#N/A	#N/A	778.326	#N/A	#N/A
351	#N/A	383.876	#N/A	#N/A	#N/A	383.907	#N/A	#N/A	#N/A	383.829	#N/A	#N/A	#N/A	383.895	#N/A	#N/A	#N/A	384.061	#N/A	#N/A	#N/A	451.662	#N/A	#N/A	#N/A	414.109	#N/A	#N/A	#N/A	482.229	#N/A	#N/A
352	604.131	#N/A	#N/A	#N/A	604.162	#N/A	#N/A	#N/A	604.085	#N/A	#N/A	#N/A	604.151	#N/A	#N/A	#N/A	604.131	#N/A	#N/A	#N/A	667.353	#N/A	#N/A	#N/A	629.812	#N/A	#N/A	#N/A	693.087	#N/A	#N/A	#N/A
353	639.804	#N/A	#N/A	#N/A	639.835	#N/A	#N/A	#N/A	639.757	#N/A	#N/A	#N/A	639.823	#N/A	#N/A	#N/A	639.804	#N/A	#N/A	#N/A	704.751	#N/A	#N/A	#N/A	675.958	#N/A	#N/A	#N/A	740.959	#N/A	#N/A	#N/A
354	#N/A	636.239	#N/A	#N/A	#N/A	636.27	#N/A	#N/A	#N/A	636.192	#N/A	#N/A	#N/A	636.258	#N/A	#N/A	#N/A	636.424	#N/A	#N/A	#N/A	754.621	#N/A	#N/A	#N/A	675.91	#N/A	#N/A	#N/A	794.625	#N/A	#N/A
355	#N/A	350.651	#N/A	#N/A	#N/A	350.682	#N/A	#N/A	#N/A	350.604	#N/A	#N/A	#N/A	350.67	#N/A	#N/A	#N/A	350.741	#N/A	#N/A	#N/A	414.004	#N/A	#N/A	#N/A	374.479	#N/A	#N/A	#N/A	438.023	#N/A	#N/A
356	504.139	#N/A	#N/A	#N/A	504.17	#N/A	#N/A	#N/A	504.093	#N/A	#N/A	#N/A	504.158	#N/A	#N/A	#N/A	504.139	#N/A	#N/A	#N/A	556.521	#N/A	#N/A	#N/A	526.761	#N/A	#N/A	#N/A	579.197	#N/A	#N/A	#N/A
357	474.235	#N/A	#N/A	#N/A	474.266	#N/A	#N/A	#N/A	474.189	#N/A	#N/A	#N/A	474.254	#N/A	#N/A	#N/A	474.235	#N/A	#N/A	#N/A	522.263	#N/A	#N/A	#N/A	500.288	#N/A	#N/A	#N/A	548.369	#N/A	#N/A	#N/A
358	#N/A	318.281	#N/A	#N/A	#N/A	318.312	#N/A	#N/A	#N/A	318.235	#N/A	#N/A	#N/A	318.3	#N/A	#N/A	#N/A	318.399	#N/A	#N/A	#N/A	373.69	#N/A	#N/A	#N/A	344.424	#N/A	#N/A	#N/A	400.06	#N/A	#N/A
359	535.073	#N/A	#N/A	#N/A	535.103	#N/A	#N/A	#N/A	535.026	#N/A	#N/A	#N/A	535.092	#N/A	#N/A	#N/A	535.073	#N/A	#N/A	#N/A	590.193	#N/A	#N/A	#N/A	561.125	#N/A	#N/A	#N/A	616.3	#N/A	#N/A	#N/A
360	646.705	#N/A	#N/A	#N/A	646.736	#N/A	#N/A	#N/A	646.659	#N/A	#N/A	#N/A	646.725	#N/A	#N/A	#N/A	646.705	#N/A	#N/A	#N/A	713.974	#N/A	#N/A	#N/A	676.189	#N/A	#N/A	#N/A	743.511	#N/A	#N/A	#N/A
361	#N/A	443.619	#N/A	#N/A	#N/A	443.65	#N/A	#N/A	#N/A	443.573	#N/A	#N/A	#N/A	443.638	#N/A	#N/A	#N/A	443.771	#N/A	#N/A	#N/A	524.545	#N/A	#N/A	#N/A	473.241	#N/A	#N/A	#N/A	554.444	#N/A	#N/A
362	569.533	#N/A	#N/A	#N/A	569.564	#N/A	#N/A	#N/A	569.487	#N/A	#N/A	#N/A	569.552	#N/A	#N/A	#N/A	569.533	#N/A	#N/A	#N/A	626.936	#N/A	#N/A	#N/A	602.447	#N/A	#N/A	#N/A	659.904	#N/A	#N/A	#N/A
363	#N/A	525.717	#N/A	#N/A	#N/A	525.748	#N/A	#N/A	#N/A	525.671	#N/A	#N/A	#N/A	525.736	#N/A	#N/A	#N/A	525.87	#N/A	#N/A	#N/A	621.203	#N/A	#N/A	#N/A	562.201	#N/A	#N/A	#N/A	657.964	#N/A	#N/A
364	459.494	#N/A	#N/A	#N/A	459.525	#N/A	#N/A	#N/A	459.448	#N/A	#N/A	#N/A	459.514	#N/A	#N/A	#N/A	459.494	#N/A	#N/A	#N/A	505.803	#N/A	#N/A	#N/A	485.547	#N/A	#N/A	#N/A	531.91	#N/A	#N/A	#N/A
365	#N/A	#N/A	265.818	#N/A	#N/A	#N/A	334.267	#N/A	#N/A	#N/A	214.759	#N/A	#N/A	#N/A	289.962	#N/A	#N/A	#N/A	267.884	#N/A	#N/A	#N/A	315.596	#N/A	#N/A	#N/A	308.571	#N/A	#N/A	#N/A	449.522	#N/A
366	537.528	#N/A	#N/A	#N/A	537.559	#N/A	#N/A	#N/A	537.482	#N/A	#N/A	#N/A	537.548	#N/A	#N/A	#N/A	537.528	#N/A	#N/A	#N/A	592.935	#N/A	#N/A	#N/A	563.581	#N/A	#N/A	#N/A	619.042	#N/A	#N/A	#N/A
367	499.062	#N/A	#N/A	#N/A	499.093	#N/A	#N/A	#N/A	499.015	#N/A	#N/A	#N/A	499.081	#N/A	#N/A	#N/A	499.062	#N/A	#N/A	#N/A	549.196	#N/A	#N/A	#N/A	528.228	#N/A	#N/A	#N/A	578.417	#N/A	#N/A	#N/A
368	#N/A	337.015	#N/A	#N/A	#N/A	337.046	#N/A	#N/A	#N/A	336.969	#N/A	#N/A	#N/A	337.034	#N/A	#N/A	#N/A	337.178	#N/A	#N/A	#N/A	396.459	#N/A	#N/A	#N/A	363.208	#N/A	#N/A	#N/A	422.945	#N/A	#N/A
369	#N/A	#N/A	#N/A	166.166	#N/A	#N/A	#N/A	253.489	#N/A	#N/A	#N/A	101.016	#N/A	#N/A	#N/A	196.968	#N/A	#N/A	#N/A	174.307	#N/A	#N/A	#N/A	190.316	#N/A	#N/A	#N/A	221.828	#N/A	#N/A	#N/A	381.775
370	398.114	#N/A	#N/A	#N/A	398.145	#N/A	#N/A	#N/A	398.068	#N/A	#N/A	#N/A	398.133	#N/A	#N/A	#N/A	398.114	#N/A	#N/A	#N/A	438.221	#N/A	#N/A	#N/A	420.395	#N/A	#N/A	#N/A	460.556	#N/A	#N/A	#N/A
371	#N/A	292.431	#N/A	#N/A	#N/A	292.462	#N/A	#N/A	#N/A	292.385	#N/A	#N/A	#N/A	292.451	#N/A	#N/A	#N/A	292.549	#N/A	#N/A	#N/A	343.202	#N/A	#N/A	#N/A	316.529	#N/A	#N/A	#N/A	367.526	#N/A	#N/A
372	361.81	#N/A	#N/A	#N/A	361.84	#N/A	#N/A	#N/A	361.763	#N/A	#N/A	#N/A	361.829	#N/A	#N/A	#N/A	361.81	#N/A	#N/A	#N/A	398.017	#N/A	#N/A	#N/A	382.773	#N/A	#N/A	#N/A	419.034	#N/A	#N/A	#N/A
373	400.184	#N/A	#N/A	#N/A	400.215	#N/A	#N/A	#N/A	400.138	#N/A	#N/A	#N/A	400.204	#N/A	#N/A	#N/A	400.184	#N/A	#N/A	#N/A	440.239	#N/A	#N/A	#N/A	423.624	#N/A	#N/A	#N/A	463.733	#N/A	#N/A	#N/A
374	#N/A	288.916	#N/A	#N/A	#N/A	288.947	#N/A	#N/A	#N/A	288.87	#N/A	#N/A	#N/A	288.935	#N/A	#N/A	#N/A	289.01	#N/A	#N/A	#N/A	339.592	#N/A	#N/A	#N/A	311.594	#N/A	#N/A	#N/A	362.463	#N/A	#N/A
375	507.578	#N/A	#N/A	#N/A	507.609	#N/A	#N/A	#N/A	507.532	#N/A	#N/A	#N/A	507.598	#N/A	#N/A	#N/A	507.578	#N/A	#N/A	#N/A	561.012	#N/A	#N/A	#N/A	527.627	#N/A	#N/A	#N/A	581.115	#N/A	#N/A	#N/A
376	#N/A	266.062	#N/A	#N/A	#N/A	266.093	#N/A	#N/A	#N/A	266.015	#N/A	#N/A	#N/A	266.081	#N/A	#N/A	#N/A	266.165	#N/A	#N/A	#N/A	311.676	#N/A	#N/A	#N/A	288.976	#N/A	#N/A	#N/A	334.796	#N/A	#N/A
377	#N/A	#N/A	185.619	#N/A	#N/A	#N/A	234.197	#N/A	#N/A	#N/A	149.351	#N/A	#N/A	#N/A	202.761	#N/A	#N/A	#N/A	187.167	#N/A	#N/A	#N/A	216.955	#N/A	#N/A	#N/A	220.359	#N/A	#N/A	#N/A	316.221	#N/A
378	406.918	#N/A	#N/A	#N/A	406.949	#N/A	#N/A	#N/A	406.872	#N/A	#N/A	#N/A	406.938	#N/A	#N/A	#N/A	406.918	#N/A	#N/A	#N/A	448.18	#N/A	#N/A	#N/A	428.692	#N/A	#N/A	#N/A	470.008	#N/A	#N/A	#N/A
379	#N/A	345.152	#N/A	#N/A	#N/A	345.183	#N/A	#N/A	#N/A	345.105	#N/A	#N/A	#N/A	345.171	#N/A	#N/A	#N/A	345.262	#N/A	#N/A	#N/A	406.162	#N/A	#N/A	#N/A	371.762	#N/A	#N/A	#N/A	432.988	#N/A	#N/A
380	660.218	#N/A	#N/A	#N/A	660.249	#N/A	#N/A	#N/A	660.172	#N/A	#N/A	#N/A	660.237	#N/A	#N/A	#N/A	660.218	#N/A	#N/A	#N/A	728.964	#N/A	#N/A	#N/A	690.265	#N/A	#N/A	#N/A	759.065	#N/A	#N/A	#N/A
381	#N/A	#N/A	480.743	#N/A	#N/A	#N/A	551.365	#N/A	#N/A	#N/A	427.928	#N/A	#N/A	#N/A	505.814	#N/A	#N/A	#N/A	482.49	#N/A	#N/A	#N/A	586.193	#N/A	#N/A	#N/A	528.47	#N/A	#N/A	#N/A	730.123	#N/A
382	589.586	#N/A	#N/A	#N/A	589.617	#N/A	#N/A	#N/A	589.54	#N/A	#N/A	#N/A	589.605	#N/A	#N/A	#N/A	589.586	#N/A	#N/A	#N/A	650.629	#N/A	#N/A	#N/A	617.343	#N/A	#N/A	#N/A	678.44	#N/A	#N/A	#N/A
383	#N/A	#N/A	#N/A	207.226	#N/A	#N/A	#N/A	332.424	#N/A	#N/A	#N/A	113.578	#N/A	#N/A	#N/A	251.673	#N/A	#N/A	#N/A	216.5	#N/A	#N/A	#N/A	242.67	#N/A	#N/A	#N/A	278.163	#N/A	#N/A	#N/A	510.651
384	508.346	#N/A	#N/A	#N/A	508.377	#N/A	#N/A	#N/A	508.299	#N/A	#N/A	#N/A	508.365	#N/A	#N/A	#N/A	508.346	#N/A	#N/A	#N/A	561.022	#N/A	#N/A	#N/A	531.343	#N/A	#N/A	#N/A	584.073	#N/A	#N/A	#N/A
385	#N/A	#N/A	#N/A	177.591	#N/A	#N/A	#N/A	282.389	#N/A	#N/A	#N/A	99.1788	#N/A	#N/A	#N/A	214.802	#N/A	#N/A	#N/A	185.763	#N/A	#N/A	#N/A	207.09	#N/A	#N/A	#N/A	237.927	#N/A	#N/A	#N/A	432.688
386	#N/A	497.157	#N/A	#N/A	#N/A	497.188	#N/A	#N/A	#N/A	497.111	#N/A	#N/A	#N/A	497.176	#N/A	#N/A	#N/A	497.169	#N/A	#N/A	#N/A	591.347	#N/A	#N/A	#N/A	523.072	#N/A	#N/A	#N/A	617.335	#N/A	#N/A
387	#N/A	#N/A	344.908	#N/A	#N/A	#N/A	426.062	#N/A	#N/A	#N/A	284.207	#N/A	#N/A	#N/A	373.719	#N/A	#N/A	#N/A	346.656	#N/A	#N/A	#N/A	416.377	#N/A	#N/A	#N/A	390.265	#N/A	#N/A	#N/A	571.758	#N/A
388	#N/A	628.056	#N/A	#N/A	#N/A	628.087	#N/A	#N/A	#N/A	628.01	#N/A	#N/A	#N/A	628.075	#N/A	#N/A	#N/A	628.101	#N/A	#N/A	#N/A	749.102	#N/A	#N/A	#N/A	657.448	#N/A	#N/A	#N/A	778.616	#N/A	#N/A
389	573.013	#N/A	#N/A	#N/A	573.044	#N/A	#N/A	#N/A	572.967	#N/A	#N/A	#N/A	573.032	#N/A	#N/A	#N/A	573.013	#N/A	#N/A	#N/A	631.75	#N/A	#N/A	#N/A	602.376	#N/A	#N/A	#N/A	661.168	#N/A	#N/A	#N/A
390	#N/A	618.231	#N/A	#N/A	#N/A	618.262	#N/A	#N/A	#N/A	618.185	#N/A	#N/A	#N/A	618.251	#N/A	#N/A	#N/A	618.277	#N/A	#N/A	#N/A	735.774	#N/A	#N/A	#N/A	650.811	#N/A	#N/A	#N/A	768.475	#N/A	#N/A
391	#N/A	761.434	#N/A	#N/A	#N/A	761.465	#N/A	#N/A	#N/A	761.388	#N/A	#N/A	#N/A	761.454	#N/A	#N/A	#N/A	761.48	#N/A	#N/A	#N/A	908.623	#N/A	#N/A	#N/A	797.202	#N/A	#N/A	#N/A	944.512	#N/A	#N/A
392	578.37	#N/A	#N/A	#N/A	578.401	#N/A	#N/A	#N/A	578.323	#N/A	#N/A	#N/A	578.389	#N/A	#N/A	#N/A	578.37	#N/A	#N/A	#N/A	638.472	#N/A	#N/A	#N/A	604.546	#N/A	#N/A	#N/A	664.702	#N/A	#N/A	#N/A
393	719.269	#N/A	#N/A	#N/A	719.3	#N/A	#N/A	#N/A	719.223	#N/A	#N/A	#N/A	719.289	#N/A	#N/A	#N/A	719.269	#N/A	#N/A	#N/A	794.319	#N/A	#N/A	#N/A	751.82	#N/A	#N/A	#N/A	826.923	#N/A	#N/A	#N/A
394	719.269	#N/A	#N/A	#N/A	719.3	#N/A	#N/A	#N/A	719.223	#N/A	#N/A	#N/A	719.289	#N/A	#N/A	#N/A	719.269	#N/A	#N/A	#N/A	794.319	#N/A	#N/A	#N/A	751.82	#N/A	#N/A	#N/A	826.923	#N/A	#N/A	#N/A
395	727.949	#N/A	#N/A	#N/A	727.98	#N/A	#N/A	#N/A	727.903	#N/A	#N/A	#N/A	727.968	#N/A	#N/A	#N/A	727.949	#N/A	#N/A	#N/A	803.27	#N/A	#N/A	#N/A	763.687	#N/A	#N/A	#N/A	839.062	#N/A	#N/A	#N/A
396	#N/A	#N/A	444.885	#N/A	#N/A	#N/A	534.241	#N/A	#N/A	#N/A	378.066	#N/A	#N/A	#N/A	476.604	#N/A	#N/A	#N/A	446.632	#N/A	#N/A	#N/A	539.412	#N/A	#N/A	#N/A	498.268	#N/A	#N/A	#N/A	713.823	#N/A
397	754.816	#N/A	#N/A	#N/A	754.847	#N/A	#N/A	#N/A	754.77	#N/A	#N/A	#N/A	754.836	#N/A	#N/A	#N/A	754.816	#N/A	#N/A	#N/A	834.01	#N/A	#N/A	#N/A	787.367	#N/A	#N/A	#N/A	866.614	#N/A	#N/A	#N/A
398	593.55	#N/A	#N/A	#N/A	593.581	#N/A	#N/A	#N/A	593.503	#N/A	#N/A	#N/A	593.569	#N/A	#N/A	#N/A	593.55	#N/A	#N/A	#N/A	655.214	#N/A	#N/A	#N/A	620.618	#N/A	#N/A	#N/A	682.337	#N/A	#N/A	#N/A
399	#N/A	#N/A	#N/A	172.286	#N/A	#N/A	#N/A	271.771	#N/A	#N/A	#N/A	97.8403	#N/A	#N/A	#N/A	207.612	#N/A	#N/A	#N/A	180.411	#N/A	#N/A	#N/A	200.235	#N/A	#N/A	#N/A	231.071	#N/A	#N/A	#N/A	416.37
400	437.254	#N/A	#N/A	#N/A	437.285	#N/A	#N/A	#N/A	437.208	#N/A	#N/A	#N/A	437.273	#N/A	#N/A	#N/A	437.254	#N/A	#N/A	#N/A	482.262	#N/A	#N/A	#N/A	457.582	#N/A	#N/A	#N/A	502.644	#N/A	#N/A	#N/A
401	478.266	#N/A	#N/A	#N/A	478.297	#N/A	#N/A	#N/A	478.22	#N/A	#N/A	#N/A	478.285	#N/A	#N/A	#N/A	478.266	#N/A	#N/A	#N/A	527.156	#N/A	#N/A	#N/A	502.465	#N/A	#N/A	#N/A	551.409	#N/A	#N/A	#N/A
402	#N/A	#N/A	#N/A	281.278	#N/A	#N/A	#N/A	462.45	#N/A	#N/A	#N/A	146.254	#N/A	#N/A	#N/A	345.151	#N/A	#N/A	#N/A	299.14	#N/A	#N/A	#N/A	332.669	#N/A	#N/A	#N/A	371.959	#N/A	#N/A	#N/A	708.588
403	615.375	#N/A	#N/A	#N/A	615.406	#N/A	#N/A	#N/A	615.328	#N/A	#N/A	#N/A	615.394	#N/A	#N/A	#N/A	615.375	#N/A	#N/A	#N/A	680.726	#N/A	#N/A	#N/A	637.997	#N/A	#N/A	#N/A	703.402	#N/A	#N/A	#N/A
404	645.284	#N/A	#N/A	#N/A	645.315	#N/A	#N/A	#N/A	645.238	#N/A	#N/A	#N/A	645.304	#N/A	#N/A	#N/A	645.284	#N/A	#N/A	#N/A	713.42	#N/A	#N/A	#N/A	670.683	#N/A	#N/A	#N/A	738.873	#N/A	#N/A	#N/A
405	615.358	#N/A	#N/A	#N/A	615.389	#N/A	#N/A	#N/A	615.312	#N/A	#N/A	#N/A	615.378	#N/A	#N/A	#N/A	615.358	#N/A	#N/A	#N/A	678.817	#N/A	#N/A	#N/A	645.454	#N/A	#N/A	#N/A	708.967	#N/A	#N/A	#N/A
406	#N/A	#N/A	463.972	#N/A	#N/A	#N/A	535.701	#N/A	#N/A	#N/A	410.496	#N/A	#N/A	#N/A	489.266	#N/A	#N/A	#N/A	466.061	#N/A	#N/A	#N/A	562.423	#N/A	#N/A	#N/A	514.344	#N/A	#N/A	#N/A	708.577	#N/A
407	#N/A	#N/A	#N/A	216.781	#N/A	#N/A	#N/A	336.59	#N/A	#N/A	#N/A	127.445	#N/A	#N/A	#N/A	259.031	#N/A	#N/A	#N/A	228.932	#N/A	#N/A	#N/A	250.361	#N/A	#N/A	#N/A	289.53	#N/A	#N/A	#N/A	511.576
408	#N/A	400.228	#N/A	#N/A	#N/A	400.259	#N/A	#N/A	#N/A	400.182	#N/A	#N/A	#N/A	400.248	#N/A	#N/A	#N/A	400.305	#N/A	#N/A	#N/A	475.032	#N/A	#N/A	#N/A	422.876	#N/A	#N/A	#N/A	497.846	#N/A	#N/A
409	#N/A	460.042	#N/A	#N/A	#N/A	460.073	#N/A	#N/A	#N/A	459.996	#N/A	#N/A	#N/A	460.062	#N/A	#N/A	#N/A	460.057	#N/A	#N/A	#N/A	546.231	#N/A	#N/A	#N/A	486.037	#N/A	#N/A	#N/A	572.3	#N/A	#N/A
410	#N/A	460.115	#N/A	#N/A	#N/A	460.146	#N/A	#N/A	#N/A	460.068	#N/A	#N/A	#N/A	460.134	#N/A	#N/A	#N/A	460.129	#N/A	#N/A	#N/A	546.319	#N/A	#N/A	#N/A	486.109	#N/A	#N/A	#N/A	572.388	#N/A	#N/A
411	#N/A	486.982	#N/A	#N/A	#N/A	487.013	#N/A	#N/A	#N/A	486.936	#N/A	#N/A	#N/A	487.001	#N/A	#N/A	#N/A	487.01	#N/A	#N/A	#N/A	577.385	#N/A	#N/A	#N/A	516.426	#N/A	#N/A	#N/A	606.924	#N/A	#N/A
412	#N/A	507.704	#N/A	#N/A	#N/A	507.735	#N/A	#N/A	#N/A	507.658	#N/A	#N/A	#N/A	507.724	#N/A	#N/A	#N/A	507.757	#N/A	#N/A	#N/A	602.581	#N/A	#N/A	#N/A	537.181	#N/A	#N/A	#N/A	632.19	#N/A	#N/A
413	#N/A	556.705	#N/A	#N/A	#N/A	556.736	#N/A	#N/A	#N/A	556.659	#N/A	#N/A	#N/A	556.725	#N/A	#N/A	#N/A	556.758	#N/A	#N/A	#N/A	660.585	#N/A	#N/A	#N/A	589.613	#N/A	#N/A	#N/A	693.624	#N/A	#N/A
414	#N/A	#N/A	#N/A	208.947	#N/A	#N/A	#N/A	328.609	#N/A	#N/A	#N/A	119.72	#N/A	#N/A	#N/A	251.145	#N/A	#N/A	#N/A	219.605	#N/A	#N/A	#N/A	242.484	#N/A	#N/A	#N/A	278.112	#N/A	#N/A	#N/A	497.724
415	#N/A	#N/A	#N/A	184.963	#N/A	#N/A	#N/A	282.858	#N/A	#N/A	#N/A	111.943	#N/A	#N/A	#N/A	219.491	#N/A	#N/A	#N/A	194.542	#N/A	#N/A	#N/A	212.182	#N/A	#N/A	#N/A	247.258	#N/A	#N/A	#N/A	427.608
416	707.914	#N/A	#N/A	#N/A	707.945	#N/A	#N/A	#N/A	707.868	#N/A	#N/A	#N/A	707.933	#N/A	#N/A	#N/A	707.914	#N/A	#N/A	#N/A	783.187	#N/A	#N/A	#N/A	733.967	#N/A	#N/A	#N/A	809.293	#N/A	#N/A	#N/A
417	#N/A	721.25	#N/A	#N/A	#N/A	721.281	#N/A	#N/A	#N/A	721.204	#N/A	#N/A	#N/A	721.269	#N/A	#N/A	#N/A	721.303	#N/A	#N/A	#N/A	860.774	#N/A	#N/A	#N/A	754.158	#N/A	#N/A	#N/A	893.814	#N/A	#N/A
418	#N/A	#N/A	#N/A	213.555	#N/A	#N/A	#N/A	334.788	#N/A	#N/A	#N/A	123.158	#N/A	#N/A	#N/A	256.307	#N/A	#N/A	#N/A	224.213	#N/A	#N/A	#N/A	247.548	#N/A	#N/A	#N/A	284.543	#N/A	#N/A	#N/A	506.873
419	523.811	#N/A	#N/A	#N/A	523.842	#N/A	#N/A	#N/A	523.765	#N/A	#N/A	#N/A	523.831	#N/A	#N/A	#N/A	523.811	#N/A	#N/A	#N/A	577.619	#N/A	#N/A	#N/A	549.864	#N/A	#N/A	#N/A	603.726	#N/A	#N/A	#N/A
420	588.021	#N/A	#N/A	#N/A	588.052	#N/A	#N/A	#N/A	587.975	#N/A	#N/A	#N/A	588.041	#N/A	#N/A	#N/A	588.021	#N/A	#N/A	#N/A	648.64	#N/A	#N/A	#N/A	616.746	#N/A	#N/A	#N/A	677.418	#N/A	#N/A	#N/A
421	467.941	#N/A	#N/A	#N/A	467.972	#N/A	#N/A	#N/A	467.895	#N/A	#N/A	#N/A	467.961	#N/A	#N/A	#N/A	467.941	#N/A	#N/A	#N/A	515.235	#N/A	#N/A	#N/A	493.994	#N/A	#N/A	#N/A	541.342	#N/A	#N/A	#N/A
422	505.325	#N/A	#N/A	#N/A	505.356	#N/A	#N/A	#N/A	505.278	#N/A	#N/A	#N/A	505.344	#N/A	#N/A	#N/A	505.325	#N/A	#N/A	#N/A	556.977	#N/A	#N/A	#N/A	531.377	#N/A	#N/A	#N/A	583.084	#N/A	#N/A	#N/A
423	509.94	#N/A	#N/A	#N/A	509.971	#N/A	#N/A	#N/A	509.894	#N/A	#N/A	#N/A	509.96	#N/A	#N/A	#N/A	509.94	#N/A	#N/A	#N/A	561.953	#N/A	#N/A	#N/A	536.695	#N/A	#N/A	#N/A	588.762	#N/A	#N/A	#N/A
424	#N/A	569.616	#N/A	#N/A	#N/A	569.647	#N/A	#N/A	#N/A	569.569	#N/A	#N/A	#N/A	569.635	#N/A	#N/A	#N/A	569.669	#N/A	#N/A	#N/A	676.292	#N/A	#N/A	#N/A	602.524	#N/A	#N/A	#N/A	709.331	#N/A	#N/A
425	#N/A	569.616	#N/A	#N/A	#N/A	569.647	#N/A	#N/A	#N/A	569.569	#N/A	#N/A	#N/A	569.635	#N/A	#N/A	#N/A	569.669	#N/A	#N/A	#N/A	676.292	#N/A	#N/A	#N/A	602.524	#N/A	#N/A	#N/A	709.331	#N/A	#N/A
426	#N/A	687.177	#N/A	#N/A	#N/A	687.208	#N/A	#N/A	#N/A	687.131	#N/A	#N/A	#N/A	687.196	#N/A	#N/A	#N/A	687.23	#N/A	#N/A	#N/A	817.708	#N/A	#N/A	#N/A	723.516	#N/A	#N/A	#N/A	854.178	#N/A	#N/A
427	481.884	#N/A	#N/A	#N/A	481.915	#N/A	#N/A	#N/A	481.838	#N/A	#N/A	#N/A	481.903	#N/A	#N/A	#N/A	481.884	#N/A	#N/A	#N/A	531.671	#N/A	#N/A	#N/A	504.506	#N/A	#N/A	#N/A	554.347	#N/A	#N/A	#N/A
428	467.909	#N/A	#N/A	#N/A	467.94	#N/A	#N/A	#N/A	467.863	#N/A	#N/A	#N/A	467.929	#N/A	#N/A	#N/A	467.909	#N/A	#N/A	#N/A	516.067	#N/A	#N/A	#N/A	490.531	#N/A	#N/A	#N/A	538.743	#N/A	#N/A	#N/A
429	725.487	#N/A	#N/A	#N/A	725.518	#N/A	#N/A	#N/A	725.44	#N/A	#N/A	#N/A	725.506	#N/A	#N/A	#N/A	725.487	#N/A	#N/A	#N/A	800.315	#N/A	#N/A	#N/A	761.396	#N/A	#N/A	#N/A	836.278	#N/A	#N/A	#N/A
430	734.367	#N/A	#N/A	#N/A	734.398	#N/A	#N/A	#N/A	734.321	#N/A	#N/A	#N/A	734.387	#N/A	#N/A	#N/A	734.367	#N/A	#N/A	#N/A	809.869	#N/A	#N/A	#N/A	771.707	#N/A	#N/A	#N/A	847.263	#N/A	#N/A	#N/A
431	#N/A	#N/A	495.115	#N/A	#N/A	#N/A	581.134	#N/A	#N/A	#N/A	430.996	#N/A	#N/A	#N/A	525.446	#N/A	#N/A	#N/A	497.164	#N/A	#N/A	#N/A	599.96	#N/A	#N/A	#N/A	550.855	#N/A	#N/A	#N/A	769.954	#N/A
432	1245.41	#N/A	#N/A	#N/A	1245.44	#N/A	#N/A	#N/A	1245.37	#N/A	#N/A	#N/A	1245.43	#N/A	#N/A	#N/A	1245.41	#N/A	#N/A	#N/A	1382.49	#N/A	#N/A	#N/A	1274.9	#N/A	#N/A	#N/A	1412.02	#N/A	#N/A	#N/A
433	780.952	#N/A	#N/A	#N/A	780.983	#N/A	#N/A	#N/A	780.906	#N/A	#N/A	#N/A	780.972	#N/A	#N/A	#N/A	780.952	#N/A	#N/A	#N/A	864.971	#N/A	#N/A	#N/A	806.091	#N/A	#N/A	#N/A	890.164	#N/A	#N/A	#N/A
434	763.876	#N/A	#N/A	#N/A	763.907	#N/A	#N/A	#N/A	763.83	#N/A	#N/A	#N/A	763.895	#N/A	#N/A	#N/A	763.876	#N/A	#N/A	#N/A	843.07	#N/A	#N/A	#N/A	800.221	#N/A	#N/A	#N/A	879.469	#N/A	#N/A	#N/A
435	481.458	#N/A	#N/A	#N/A	481.489	#N/A	#N/A	#N/A	481.412	#N/A	#N/A	#N/A	481.477	#N/A	#N/A	#N/A	481.458	#N/A	#N/A	#N/A	530.328	#N/A	#N/A	#N/A	507.511	#N/A	#N/A	#N/A	556.434	#N/A	#N/A	#N/A
436	576.95	#N/A	#N/A	#N/A	576.981	#N/A	#N/A	#N/A	576.904	#N/A	#N/A	#N/A	576.97	#N/A	#N/A	#N/A	576.95	#N/A	#N/A	#N/A	636.197	#N/A	#N/A	#N/A	605.997	#N/A	#N/A	#N/A	665.297	#N/A	#N/A	#N/A
437	414.151	#N/A	#N/A	#N/A	414.182	#N/A	#N/A	#N/A	414.105	#N/A	#N/A	#N/A	414.17	#N/A	#N/A	#N/A	414.151	#N/A	#N/A	#N/A	456.041	#N/A	#N/A	#N/A	436.773	#N/A	#N/A	#N/A	478.717	#N/A	#N/A	#N/A
438	494.811	#N/A	#N/A	#N/A	494.842	#N/A	#N/A	#N/A	494.765	#N/A	#N/A	#N/A	494.83	#N/A	#N/A	#N/A	494.811	#N/A	#N/A	#N/A	546.105	#N/A	#N/A	#N/A	517.433	#N/A	#N/A	#N/A	568.781	#N/A	#N/A	#N/A
439	447.339	#N/A	#N/A	#N/A	447.37	#N/A	#N/A	#N/A	447.293	#N/A	#N/A	#N/A	447.358	#N/A	#N/A	#N/A	447.339	#N/A	#N/A	#N/A	493.099	#N/A	#N/A	#N/A	469.961	#N/A	#N/A	#N/A	515.774	#N/A	#N/A	#N/A
440	#N/A	#N/A	#N/A	176.901	#N/A	#N/A	#N/A	271.267	#N/A	#N/A	#N/A	106.507	#N/A	#N/A	#N/A	210.185	#N/A	#N/A	#N/A	186.425	#N/A	#N/A	#N/A	203.095	#N/A	#N/A	#N/A	236.157	#N/A	#N/A	#N/A	410.319
441	364.84	#N/A	#N/A	#N/A	364.871	#N/A	#N/A	#N/A	364.794	#N/A	#N/A	#N/A	364.859	#N/A	#N/A	#N/A	364.84	#N/A	#N/A	#N/A	401.298	#N/A	#N/A	#N/A	386.207	#N/A	#N/A	#N/A	422.72	#N/A	#N/A	#N/A
442	412.651	#N/A	#N/A	#N/A	412.682	#N/A	#N/A	#N/A	412.604	#N/A	#N/A	#N/A	412.67	#N/A	#N/A	#N/A	412.651	#N/A	#N/A	#N/A	454.223	#N/A	#N/A	#N/A	435.839	#N/A	#N/A	#N/A	477.465	#N/A	#N/A	#N/A
443	#N/A	473.755	#N/A	#N/A	#N/A	473.786	#N/A	#N/A	#N/A	473.709	#N/A	#N/A	#N/A	473.775	#N/A	#N/A	#N/A	473.792	#N/A	#N/A	#N/A	562.756	#N/A	#N/A	#N/A	499.948	#N/A	#N/A	#N/A	589.058	#N/A	#N/A
444	#N/A	489.497	#N/A	#N/A	#N/A	489.528	#N/A	#N/A	#N/A	489.451	#N/A	#N/A	#N/A	489.517	#N/A	#N/A	#N/A	489.534	#N/A	#N/A	#N/A	581.909	#N/A	#N/A	#N/A	515.69	#N/A	#N/A	#N/A	608.21	#N/A	#N/A
445	#N/A	476.931	#N/A	#N/A	#N/A	476.962	#N/A	#N/A	#N/A	476.885	#N/A	#N/A	#N/A	476.951	#N/A	#N/A	#N/A	476.968	#N/A	#N/A	#N/A	567.389	#N/A	#N/A	#N/A	501.342	#N/A	#N/A	#N/A	591.909	#N/A	#N/A
446	#N/A	497.504	#N/A	#N/A	#N/A	497.535	#N/A	#N/A	#N/A	497.458	#N/A	#N/A	#N/A	497.524	#N/A	#N/A	#N/A	497.541	#N/A	#N/A	#N/A	591.382	#N/A	#N/A	#N/A	524.318	#N/A	#N/A	#N/A	618.305	#N/A	#N/A
447	#N/A	#N/A	313.01	#N/A	#N/A	#N/A	396.099	#N/A	#N/A	#N/A	250.854	#N/A	#N/A	#N/A	342.51	#N/A	#N/A	#N/A	314.841	#N/A	#N/A	#N/A	375.396	#N/A	#N/A	#N/A	359.752	#N/A	#N/A	#N/A	534.774	#N/A
448	#N/A	542.316	#N/A	#N/A	#N/A	542.347	#N/A	#N/A	#N/A	542.269	#N/A	#N/A	#N/A	542.335	#N/A	#N/A	#N/A	542.352	#N/A	#N/A	#N/A	644.748	#N/A	#N/A	#N/A	571.8	#N/A	#N/A	#N/A	674.341	#N/A	#N/A
449	#N/A	#N/A	324.491	#N/A	#N/A	#N/A	405.964	#N/A	#N/A	#N/A	263.543	#N/A	#N/A	#N/A	353.418	#N/A	#N/A	#N/A	326.323	#N/A	#N/A	#N/A	388.536	#N/A	#N/A	#N/A	373.583	#N/A	#N/A	#N/A	548.109	#N/A
450	#N/A	#N/A	#N/A	183.845	#N/A	#N/A	#N/A	281.322	#N/A	#N/A	#N/A	111.136	#N/A	#N/A	#N/A	218.226	#N/A	#N/A	#N/A	192.701	#N/A	#N/A	#N/A	210.943	#N/A	#N/A	#N/A	245.705	#N/A	#N/A	#N/A	424.275
451	#N/A	#N/A	#N/A	195.07	#N/A	#N/A	#N/A	309.519	#N/A	#N/A	#N/A	109.724	#N/A	#N/A	#N/A	235.431	#N/A	#N/A	#N/A	203.925	#N/A	#N/A	#N/A	227.094	#N/A	#N/A	#N/A	258.841	#N/A	#N/A	#N/A	466.795
452	435.493	#N/A	#N/A	#N/A	435.524	#N/A	#N/A	#N/A	435.446	#N/A	#N/A	#N/A	435.512	#N/A	#N/A	#N/A	435.493	#N/A	#N/A	#N/A	479.003	#N/A	#N/A	#N/A	461.545	#N/A	#N/A	#N/A	505.11	#N/A	#N/A	#N/A
453	#N/A	#N/A	271.763	#N/A	#N/A	#N/A	350.938	#N/A	#N/A	#N/A	212.715	#N/A	#N/A	#N/A	299.687	#N/A	#N/A	#N/A	273.91	#N/A	#N/A	#N/A	323.03	#N/A	#N/A	#N/A	316.273	#N/A	#N/A	#N/A	472.753	#N/A
454	#N/A	474.697	#N/A	#N/A	#N/A	474.728	#N/A	#N/A	#N/A	474.65	#N/A	#N/A	#N/A	474.716	#N/A	#N/A	#N/A	474.739	#N/A	#N/A	#N/A	562.429	#N/A	#N/A	#N/A	504.16	#N/A	#N/A	#N/A	592.009	#N/A	#N/A
455	#N/A	#N/A	298.275	#N/A	#N/A	#N/A	382.919	#N/A	#N/A	#N/A	235.158	#N/A	#N/A	#N/A	328.126	#N/A	#N/A	#N/A	300.422	#N/A	#N/A	#N/A	354.617	#N/A	#N/A	#N/A	347.059	#N/A	#N/A	#N/A	515.756	#N/A
456	#N/A	#N/A	271.763	#N/A	#N/A	#N/A	350.938	#N/A	#N/A	#N/A	212.715	#N/A	#N/A	#N/A	299.687	#N/A	#N/A	#N/A	273.91	#N/A	#N/A	#N/A	323.03	#N/A	#N/A	#N/A	316.273	#N/A	#N/A	#N/A	472.753	#N/A
457	#N/A	464.025	#N/A	#N/A	#N/A	464.056	#N/A	#N/A	#N/A	463.979	#N/A	#N/A	#N/A	464.044	#N/A	#N/A	#N/A	464.068	#N/A	#N/A	#N/A	550.347	#N/A	#N/A	#N/A	491.57	#N/A	#N/A	#N/A	578.009	#N/A	#N/A
458	#N/A	#N/A	#N/A	196.986	#N/A	#N/A	#N/A	313.992	#N/A	#N/A	#N/A	109.737	#N/A	#N/A	#N/A	238.248	#N/A	#N/A	#N/A	205.842	#N/A	#N/A	#N/A	229.752	#N/A	#N/A	#N/A	261.149	#N/A	#N/A	#N/A	473.529
459	#N/A	480.41	#N/A	#N/A	#N/A	480.441	#N/A	#N/A	#N/A	480.364	#N/A	#N/A	#N/A	480.43	#N/A	#N/A	#N/A	480.453	#N/A	#N/A	#N/A	570.719	#N/A	#N/A	#N/A	507.027	#N/A	#N/A	#N/A	597.452	#N/A	#N/A

## Sheet: Figure 5 - Market
Vehicle #	Powertrain	Segment	2023 Market (Tg CO2e)	Electrified Market (Mg CO2e)	Electrified w/ 90th percential BEV (Mg CO2e)	Electrfied w/ 90th percentile BEV + short-run AERs
1	ICEV	large SUV	7.11281	2.68312	3.2514	4.67018
2	ICEV	large SUV	2.86064	1.2069	1.46252	2.10071
3	ICEV	large SUV	7.06408	3.55021	4.30214	6.17941
4	HEV	large SUV	5.77078	3.50537	4.2478	6.10137
5	ICEV	Van	9.13161	3.73441	4.52535	6.50003
6	ICEV	large SUV	5.37441	2.06547	2.50293	3.59511
7	ICEV	large SUV	9.11313	3.49401	4.23403	6.08159
8	ICEV	Pickup	8.70241	4.40648	4.42749	6.37401
9	ICEV	Sedan	2.02034	0.965066	1.33636	1.89531
10	ICEV	small SUV	0.960675	0.394888	0.493979	0.692734
11	ICEV	Sedan	1.71665	0.627711	0.869211	1.23277
12	ICEV	Sedan	4.38563	2.10044	2.90855	4.12511
13	HEV	Sedan	4.04148	2.42675	3.3604	4.76595
14	ICEV	Sedan	10.3416	5.2253	7.23564	10.2621
15	ICEV	small SUV	2.40765	1.19568	1.49572	2.09753
16	HEV	small SUV	1.98963	1.17007	1.46368	2.05259
17	ICEV	Sedan	7.87506	3.34551	4.63263	6.57032
18	ICEV	large SUV	0.181209	0.0545714	0.0661294	0.0949856
19	ICEV	Sedan	0.110908	0.00467927	0.00647954	0.00918973
20	ICEV	Sedan	0.12621	0.00915211	0.0126732	0.017974
21	ICEV	Sedan	0.11219	0.0290046	0.0401636	0.0569628
22	HEV	large SUV	0.152117	0.00768283	0.00931003	0.0133725
23	HEV	large SUV	0.345759	0.416469	0.416469	0.605284
24	ICEV	large SUV	2.35265	1.16588	1.41281	2.0293
25	ICEV	large SUV	3.47577	1.46565	1.77607	2.55108
26	HEV	large SUV	0.713545	0.297535	0.360552	0.517882
27	ICEV	large SUV	0.723376	0.296743	0.359593	0.516504
28	HEV	large SUV	0.315136	0.131586	0.159455	0.229035
29	ICEV	large SUV	0.946483	0.293903	0.356151	0.511561
30	HEV	large SUV	4.29561	1.70861	2.07049	2.97397
31	PHEV	large SUV	1.28653	0.679721	0.823684	1.18311
32	ICEV	large SUV	0.4144	0.126836	0.1537	0.220769
33	HEV	large SUV	0.765567	0.306102	0.370934	0.532795
34	HEV	large SUV	2.57917	0.983076	1.19129	1.71112
35	PHEV	large SUV	0.220134	0.0936839	0.113526	0.163064
36	ICEV	Sedan	0.213149	0.0904545	0.125255	0.177646
37	ICEV	Sedan	0.23429	0.0998818	0.13831	0.19616
38	PHEV	Sedan	0.41362	0.224536	0.310922	0.440972
39	ICEV	Sedan	1.44129	0.612503	0.848152	1.20291
40	ICEV	Sedan	1.0021	0.426192	0.590162	0.837008
41	PHEV	Sedan	0.314769	0.160299	0.221972	0.314816
42	ICEV	Sedan	0.70092	0.297891	0.412499	0.585034
43	HEV	Sedan	0.541083	0.214662	0.297249	0.421579
44	HEV	Sedan	0.290824	0.118358	0.163894	0.232446
45	HEV	Sedan	0.397718	0.126994	0.175853	0.249406
46	ICEV	Sedan	0.167413	0.0629293	0.0871402	0.123588
47	ICEV	Sedan	0.115418	0.0102875	0.0142455	0.0202039
48	HEV	Sedan	0.719008	0.85289	0.85289	1.20864
49	HEV	Sedan	0.0981668	0.115798	0.115798	0.162614
50	ICEV	Sedan	0.155959	0.0465863	0.0645095	0.0914918
51	ICEV	Sedan	0.0831315	0.0140034	0.019391	0.0275016
52	ICEV	Sedan	0.225034	0.0903168	0.125065	0.177375
53	ICEV	Sedan	0.528623	0.156343	0.216493	0.307045
54	HEV	Sedan	0.480596	0.195153	0.270235	0.383266
55	ICEV	Sedan	0.427986	0.125446	0.173709	0.246366
56	HEV	Sedan	0.472194	0.186173	0.2578	0.36563
57	ICEV	Sedan	0.218409	0.0594199	0.0822806	0.116696
58	ICEV	Sedan	0.260928	0.0809927	0.112153	0.159063
59	ICEV	Sedan	0.291128	0.0792036	0.109676	0.15555
60	ICEV	Sedan	0.265675	0.0799605	0.110724	0.157036
61	ICEV	Sedan	0.135843	0.0562889	0.077945	0.110547
62	ICEV	small SUV	1.48556	0.615872	0.770415	1.0804
63	ICEV	Sedan	0.101959	0.0426296	0.0590305	0.0837211
64	ICEV	Sedan	2.02228	0.90654	1.25531	1.78037
65	PHEV	Sedan	0.0631553	0.0301744	0.0417835	0.0592602
66	HEV	Sedan	0.0965334	0.119051	0.119051	0.178897
67	ICEV	Sedan	0.166612	0.0371933	0.0515028	0.0730448
68	ICEV	Sedan	0.15369	0.0123519	0.0171041	0.0242582
69	ICEV	Sedan	0.158126	0.00433521	0.0060031	0.00851401
70	ICEV	large SUV	0.44103	0.190813	0.231227	0.332125
71	ICEV	Van	8.64782	3.43609	4.16384	5.98077
72	PHEV	Van	1.64367	1.21291	1.4698	2.11116
73	ICEV	Van	2.60508	1.05683	1.28067	1.83949
74	ICEV	large SUV	6.71212	2.29367	2.77947	3.99231
75	ICEV	large SUV	0.601998	0.261542	0.316936	0.455234
76	ICEV	large SUV	0.100184	0.0397644	0.0481865	0.0692131
77	ICEV	large SUV	1.50743	0.650759	0.788588	1.1327
78	ICEV	large SUV	6.44258	3.12631	3.78845	5.44157
79	ICEV	Pickup	10.0107	4.52819	4.54978	6.55007
80	ICEV	Pickup	0.585378	0.291522	0.292912	0.42169
81	ICEV	large SUV	27.9594	10.5908	12.8339	18.4341
82	PHEV	large SUV	2.2615	1.26171	1.52893	2.1961
83	ICEV	large SUV	1.91131	0.554514	0.671958	0.965174
84	ICEV	large SUV	2.82308	1.27544	1.54558	2.22
85	ICEV	large SUV	3.00079	0.983169	1.1914	1.71128
86	HEV	large SUV	0.380697	0.117291	0.142133	0.204154
87	ICEV	large SUV	5.21165	1.89384	2.29495	3.29637
88	HEV	large SUV	6.2286	2.27165	2.75278	3.95398
89	PHEV	large SUV	5.06714	2.37041	2.87245	4.12588
90	ICEV	large SUV	0.458751	0.167858	0.20341	0.29217
91	HEV	Pickup	20.0753	9.64115	9.68712	13.946
92	ICEV	Pickup	8.01681	3.45714	3.47363	5.00079
93	ICEV	Pickup	0.688247	0.351835	0.353513	0.508933
94	HEV	large SUV	0.585248	0.260425	0.315582	0.453289
95	ICEV	large SUV	0.127569	0.0156916	0.019015	0.0273124
96	ICEV	large SUV	0.313512	0.101181	0.12261	0.176112
97	ICEV	Sedan	0.27648	0.108793	0.150649	0.213661
98	ICEV	small SUV	0.0864956	0.0158061	0.0197724	0.0277279
99	ICEV	Sedan	1.78891	0.598396	0.828618	1.1752
100	ICEV	Sedan	7.83928	2.35209	3.25701	4.61932
101	ICEV	Sedan	9.72134	3.14186	4.35063	6.17036
102	ICEV	Sedan	0.112812	0.0310002	0.0429269	0.0608819
103	ICEV	Sedan	0.115677	0.0207127	0.0286815	0.0406781
104	ICEV	Sedan	0.117182	0.00946176	0.013102	0.0185822
105	PHEV	Sedan	0.10742	0.0163775	0.0226784	0.032164
106	ICEV	Sedan	0.161946	0.0190612	0.0263946	0.0374346
107	ICEV	Sedan	0.171871	0.00240845	0.00333506	0.00473001
108	ICEV	Sedan	0.135668	0.0196117	0.0271569	0.0385158
109	ICEV	Sedan	0.1594	0.00123863	0.00171517	0.00243257
110	ICEV	Sedan	0.160135	0.00388793	0.00538373	0.00763558
111	ICEV	Sedan	0.115332	0.0189235	0.026204	0.0371643
112	ICEV	Sedan	0.116018	0.0133841	0.0185334	0.0262853
113	PHEV	Sedan	0.111818	0.0225362	0.0312066	0.0442593
114	HEV	small SUV	0.269869	0.318451	0.318451	0.447471
115	ICEV	large SUV	19.3565	5.92784	7.18334	10.3179
116	ICEV	large SUV	11.7369	5.37961	6.519	9.36362
117	ICEV	large SUV	5.81498	2.45282	2.97233	4.26933
118	ICEV	large SUV	6.33479	3.10731	3.76543	5.40851
119	HEV	large SUV	0.634943	0.408354	0.494842	0.710771
120	ICEV	large SUV	8.76693	2.83394	3.43416	4.93269
121	ICEV	large SUV	20.8346	8.21536	9.95536	14.2995
122	HEV	large SUV	0.1692	0.0707751	0.0857651	0.12319
123	HEV	Pickup	2.28652	2.74975	2.74975	3.98578
124	ICEV	Pickup	61.4488	28.9801	29.1183	41.92
125	HEV	Pickup	7.17451	3.85803	3.87643	5.58068
126	ICEV	Pickup	4.14359	2.47084	2.48262	3.57409
127	HEV	Pickup	3.81593	3.17221	3.18733	4.58863
128	ICEV	Pickup	4.01194	2.08165	2.09158	3.01113
129	ICEV	Van	2.60156	1.14232	1.38426	1.98829
130	ICEV	large SUV	3.46728	1.25603	1.52205	2.18621
131	PHEV	large SUV	0.279793	0.144577	0.175198	0.251647
132	ICEV	large SUV	1.43352	0.615464	0.745818	1.07126
133	ICEV	large SUV	2.44692	0.952577	1.15433	1.65803
134	ICEV	large SUV	2.24844	0.718461	0.870629	1.25054
135	ICEV	small SUV	2.56728	1.28739	1.61044	2.2584
136	HEV	small SUV	0.372478	0.22385	0.280022	0.392691
137	PHEV	small SUV	0.329755	0.291903	0.365152	0.512073
138	ICEV	Sedan	2.06695	0.682658	0.945298	1.34069
139	HEV	small SUV	2.35936	2.80673	2.80673	3.99493
140	PHEV	small SUV	0.0812744	0.0564342	0.0705955	0.0989998
141	ICEV	small SUV	0.889003	0.37614	0.470526	0.659845
142	ICEV	small SUV	0.521861	0.198085	0.247792	0.347492
143	ICEV	large SUV	4.86733	1.8009	2.18233	3.13461
144	ICEV	large SUV	1.91079	0.922638	1.11805	1.60592
145	ICEV	large SUV	4.58091	2.04019	2.47229	3.5511
146	ICEV	large SUV	8.64274	2.43578	2.95167	4.23966
147	ICEV	large SUV	0.332048	0.113147	0.137111	0.196941
148	ICEV	large SUV	1.17835	0.526809	0.638386	0.916951
149	ICEV	large SUV	3.27643	1.30329	1.57932	2.26847
150	ICEV	large SUV	2.54934	0.968967	1.17419	1.68656
151	ICEV	large SUV	7.15956	2.97856	3.60941	5.18441
152	ICEV	Pickup	8.63799	4.08617	4.10566	5.91069
153	ICEV	large SUV	7.48282	3.58495	4.34423	6.23987
154	ICEV	Pickup	37.9279	16.7867	16.8668	24.2821
155	ICEV	Pickup	4.4001	2.1774	2.18778	3.14963
156	ICEV	large SUV	10.5368	3.09781	3.75392	5.39197
157	ICEV	large SUV	0.634631	0.215538	0.261189	0.375161
158	ICEV	large SUV	18.4948	5.55538	6.732	9.66957
159	ICEV	large SUV	0.860684	0.293018	0.355079	0.510021
160	ICEV	large SUV	5.07132	2.48677	3.01346	4.32841
161	ICEV	large SUV	22.3105	8.37498	10.1488	14.5773
162	ICEV	large SUV	11.2727	4.65817	5.64476	8.1079
163	ICEV	Pickup	2.78532	1.28064	1.28674	1.85246
164	ICEV	Pickup	18.0295	7.74229	7.77921	11.1993
165	ICEV	Pickup	5.0285	2.44865	2.46032	3.54199
166	ICEV	large SUV	4.00119	1.82553	2.21218	3.17748
167	ICEV	large SUV	15.7005	4.57445	5.5433	7.96218
168	ICEV	large SUV	1.37435	0.466138	0.564865	0.811349
169	ICEV	small SUV	2.63781	1.30783	1.63601	2.29427
170	ICEV	small SUV	2.16894	0.95674	1.19682	1.67836
171	ICEV	Sedan	0.822414	0.308213	0.426792	0.605306
172	ICEV	Sedan	1.76451	0.631943	0.875071	1.24109
173	HEV	small SUV	0.134545	0.158359	0.158359	0.221597
174	ICEV	small SUV	1.20963	0.528882	0.661596	0.927793
175	HEV	Sedan	2.45899	2.93725	2.93725	4.20872
176	ICEV	Sedan	3.45243	1.13011	1.5649	2.21945
177	ICEV	Sedan	5.57418	1.61215	2.23239	3.16613
178	ICEV	small SUV	5.9229	2.75173	3.44224	4.82723
179	ICEV	Sedan	8.51699	3.98997	5.52504	7.836
180	ICEV	small SUV	5.73516	2.87316	3.59414	5.04026
181	HEV	Sedan	0.0407466	0.0507606	0.0507606	0.0773275
182	ICEV	small SUV	1.76039	0.782269	0.978568	1.3723
183	ICEV	large SUV	2.42838	0.894467	1.08391	1.55689
184	ICEV	large SUV	10.2261	3.95098	4.78778	6.87697
185	ICEV	large SUV	3.75359	1.53349	1.85828	2.66916
186	ICEV	large SUV	10.7796	4.52602	5.48462	7.87789
187	HEV	large SUV	2.17481	1.13012	1.36948	1.96706
188	PHEV	large SUV	0.32837	0.25195	0.305313	0.438538
189	ICEV	large SUV	9.53869	4.29363	5.20301	7.47339
190	HEV	large SUV	2.11692	1.27288	1.54247	2.21555
191	PHEV	large SUV	0.192796	0.157754	0.191166	0.274583
192	HEV	Sedan	0.0557751	0.066422	0.066422	0.0947039
193	HEV	small SUV	0.0351139	0.0422078	0.0422078	0.0610465
194	ICEV	Sedan	1.90617	0.671441	0.929766	1.31866
195	ICEV	Sedan	0.459978	0.165254	0.228832	0.324546
196	ICEV	Sedan	0.107193	0.0225018	0.0311589	0.0441918
197	HEV	Sedan	0.140931	0.042836	0.0593163	0.0841265
198	HEV	Sedan	0.161102	0.193437	0.193437	0.27931
199	ICEV	small SUV	2.65616	1.01189	1.26581	1.77511
200	ICEV	Sedan	10.063	5.12783	7.10067	10.0707
201	HEV	Sedan	1.60027	1.14047	1.57924	2.23979
202	HEV	small SUV	1.13348	1.35308	1.35308	1.93655
203	HEV	Sedan	0.361531	0.430304	0.430304	0.6131
204	ICEV	small SUV	5.55626	2.81895	3.52633	4.94516
205	HEV	small SUV	0.303025	0.36335	0.36335	0.523744
206	ICEV	small SUV	5.73985	2.4192	3.02626	4.24389
207	ICEV	Sedan	4.0721	1.92101	2.66009	3.77272
208	HEV	Sedan	0.917057	0.61529	0.852011	1.20838
209	ICEV	small SUV	4.42706	2.06505	2.58325	3.62263
210	ICEV	Sedan	2.62793	1.21692	1.68511	2.38994
211	ICEV	large SUV	0.116042	0.0106628	0.0129212	0.0185595
212	ICEV	large SUV	0.595557	0.238913	0.289514	0.415846
213	HEV	large SUV	0.119352	0.0352013	0.0426569	0.0612706
214	HEV	large SUV	0.0401257	0.049327	0.049327	0.0738924
215	ICEV	large SUV	1.50937	0.470375	0.57	0.818724
216	HEV	large SUV	2.75675	0.949644	1.15078	1.65293
217	ICEV	large SUV	0.957043	0.352479	0.427133	0.613516
218	HEV	large SUV	0.312881	0.119386	0.144672	0.207801
219	ICEV	large SUV	3.29285	1.13552	1.37602	1.97646
220	HEV	large SUV	2.95189	1.10842	1.34318	1.92929
221	PHEV	large SUV	0.0741203	0.0227225	0.0275351	0.0395503
222	ICEV	Sedan	0.164401	0.0493044	0.0682733	0.09683
223	ICEV	Sedan	0.0853591	0.0132465	0.0183428	0.026015
224	ICEV	Van	3.04189	1.2062	1.46167	2.09949
225	ICEV	large SUV	3.13653	1.57917	1.91363	2.74867
226	ICEV	large SUV	8.60648	3.76566	4.56321	6.55441
227	HEV	large SUV	2.02214	1.14074	1.38234	1.98554
228	PHEV	large SUV	0.247095	0.197006	0.238732	0.342904
229	ICEV	large SUV	9.95525	4.35784	5.28082	7.58515
230	HEV	large SUV	3.56633	2.21442	2.68343	3.85437
231	PHEV	large SUV	0.507757	0.423813	0.513575	0.737678
232	ICEV	large SUV	9.87896	3.74596	4.53935	6.52013
233	HEV	Sedan	0.627958	0.748888	0.748888	1.07021
234	ICEV	Sedan	10.6501	5.34872	7.40654	10.5045
235	ICEV	Sedan	4.49921	2.07595	2.87463	4.077
236	HEV	Sedan	1.25359	0.860642	1.19176	1.69023
237	HEV	Sedan	0.325511	0.391513	0.391513	0.566952
238	PHEV	Sedan	0.165024	0.15187	0.210299	0.298261
239	ICEV	Sedan	2.50063	1.37925	1.90989	2.70874
240	ICEV	small SUV	1.04072	0.553138	0.691939	0.970344
241	ICEV	Sedan	5.8993	2.76084	3.82302	5.42207
242	ICEV	small SUV	5.88397	2.70842	3.38806	4.75126
243	HEV	small SUV	0.133689	0.0861224	0.107734	0.151081
244	ICEV	Sedan	0.868174	0.29765	0.412165	0.584561
245	HEV	Sedan	0.231914	0.265487	0.265487	0.354798
246	ICEV	large SUV	6.69952	3.40903	4.13106	5.93368
247	ICEV	large SUV	15.3618	7.16906	8.68744	12.4783
248	ICEV	large SUV	3.07352	1.24276	1.50597	2.16311
249	ICEV	large SUV	4.93172	2.28883	2.7736	3.98388
250	ICEV	Sedan	2.18249	1.00116	1.38633	1.9662
251	HEV	Sedan	0.0288258	0.0358271	0.0358271	0.054421
252	ICEV	Sedan	0.693707	0.322767	0.446945	0.633888
253	ICEV	Sedan	0.121995	0.00271811	0.00376385	0.00533815
254	PHEV	Sedan	0.0962724	0.0249447	0.0345416	0.0489894
255	ICEV	Sedan	0.11987	0.0122143	0.0169135	0.0239879
256	ICEV	large SUV	1.36717	0.338743	0.410488	0.589608
257	ICEV	large SUV	0.888426	0.349592	0.423635	0.608491
258	HEV	large SUV	2.50921	0.876774	1.06247	1.52609
259	HEV	large SUV	2.20241	0.748633	0.907192	1.30305
260	HEV	large SUV	0.693438	0.827554	0.827554	1.18561
261	ICEV	large SUV	0.863517	0.409192	0.495858	0.71223
262	ICEV	large SUV	1.23229	0.548507	0.66468	0.954719
263	HEV	large SUV	1.84979	0.841572	1.01982	1.46482
264	ICEV	large SUV	2.29812	0.856333	1.0377	1.49051
265	ICEV	Van	3.43737	1.295	1.56928	2.25404
266	HEV	Sedan	2.4114	0.997889	1.38181	1.95978
267	ICEV	Sedan	0.447905	0.164325	0.227546	0.322722
268	ICEV	Sedan	0.987138	0.420378	0.58211	0.825589
269	HEV	Sedan	1.05168	0.392371	0.543328	0.770586
270	ICEV	Sedan	0.973313	0.368665	0.510502	0.724029
271	HEV	Sedan	0.223111	0.263853	0.263853	0.372039
272	HEV	Sedan	0.351484	0.410679	0.410679	0.567908
273	ICEV	Sedan	0.134798	0.0486851	0.0674158	0.0956137
274	ICEV	Sedan	0.0988561	0.0322044	0.0445945	0.0632469
275	HEV	Sedan	0.154887	0.0496141	0.0687021	0.0974381
276	ICEV	Sedan	0.130154	0.014141	0.0195815	0.0277719
277	HEV	Sedan	1.51463	0.492906	0.682543	0.96803
278	ICEV	Sedan	0.240629	0.0590758	0.0818041	0.11602
279	HEV	Sedan	0.141526	0.0540869	0.0748958	0.106222
280	HEV	small SUV	0.508277	0.605577	0.605577	0.864087
281	HEV	small SUV	0.540076	0.640205	0.640205	0.906053
282	ICEV	small SUV	0.566985	0.26429	0.330609	0.463632
283	ICEV	small SUV	0.67753	0.306465	0.383367	0.537617
284	HEV	small SUV	0.437781	0.198161	0.247886	0.347624
285	PHEV	Sedan	0.0591123	0.0169624	0.0234883	0.0333128
286	ICEV	large SUV	1.40203	0.626732	0.759473	1.09088
287	PHEV	large SUV	0.601758	0.375294	0.454781	0.653229
288	ICEV	large SUV	5.50477	2.61142	3.16451	4.54537
289	ICEV	small SUV	0.0863238	0.00135804	0.00169882	0.00238235
290	ICEV	Sedan	0.674853	0.398598	0.551952	0.782816
291	ICEV	small SUV	0.0833465	0.010638	0.0133074	0.0186617
292	ICEV	large SUV	0.669878	0.289945	0.351355	0.504672
293	ICEV	large SUV	0.932003	0.403046	0.48841	0.701532
294	ICEV	large SUV	3.55461	1.39287	1.68788	2.4244
295	ICEV	large SUV	1.77318	0.503388	0.610004	0.876185
296	ICEV	large SUV	3.77462	1.05031	1.27277	1.82815
297	ICEV	Pickup	9.17653	4.4657	4.487	6.45968
298	ICEV	large SUV	8.20198	3.23144	3.91586	5.62457
299	ICEV	large SUV	19.0437	10.0729	12.2064	17.5327
300	ICEV	Pickup	2.49988	1.06811	1.0732	1.54502
301	ICEV	Sedan	0.73035	0.258186	0.357518	0.507057
302	ICEV	small SUV	0.485597	0.205479	0.257041	0.360463
303	ICEV	Sedan	8.40073	4.03329	5.58503	7.92107
304	HEV	Sedan	0.698632	0.834566	0.834566	1.19564
305	ICEV	Sedan	0.117243	0.00688128	0.00952873	0.0135143
306	ICEV	Sedan	4.92969	2.49309	3.45226	4.89623
307	HEV	Sedan	0.304698	0.3711	0.3711	0.54758
308	ICEV	Sedan	1.09741	0.406546	0.562957	0.798425
309	ICEV	Sedan	3.6343	1.29647	1.79526	2.54616
310	ICEV	small SUV	11.3495	5.94705	7.43937	10.4326
311	ICEV	Sedan	5.6885	2.84748	3.94299	5.59222
312	ICEV	Sedan	1.40174	0.751161	1.04016	1.47522
313	ICEV	Sedan	0.179563	0.0605553	0.0838528	0.118926
314	ICEV	Sedan	0.176262	0.000137626	0.000190575	0.000270286
315	HEV	large SUV	1.40045	1.68365	1.68365	2.43931
316	HEV	Pickup	0.690031	0.823667	0.823667	1.18028
317	ICEV	large SUV	7.32329	2.808	3.40273	4.88754
318	ICEV	large SUV	10.4007	5.48456	6.64618	9.5463
319	PHEV	large SUV	0.125372	0.0921939	0.11172	0.160471
320	ICEV	large SUV	13.0795	6.58642	7.9814	11.4642
321	ICEV	large SUV	11.4653	5.45108	6.60561	9.48802
322	HEV	large SUV	0.385238	0.466718	0.466718	0.684475
323	ICEV	Sedan	0.562264	0.206266	0.285624	0.405091
324	ICEV	Sedan	1.99393	0.941325	1.30348	1.84869
325	ICEV	Sedan	1.21781	0.543484	0.752579	1.06736
326	ICEV	Sedan	2.0794	0.716927	0.992751	1.40799
327	HEV	large SUV	0.270591	0.32151	0.32151	0.457593
328	HEV	large SUV	2.04676	2.43079	2.43079	3.45813
329	HEV	Sedan	6.95865	8.29381	8.29381	11.8454
330	HEV	Sedan	0.612616	0.718124	0.718124	0.998623
331	HEV	small SUV	1.13152	1.3321	1.3321	1.86499
332	HEV	small SUV	12.2079	14.3781	14.3781	20.149
333	ICEV	large SUV	6.81069	2.00485	2.42947	3.48959
334	ICEV	large SUV	0.933592	0.306661	0.371611	0.533767
335	ICEV	large SUV	1.4219	0.636976	0.771886	1.10871
336	HEV	large SUV	0.538648	0.336927	0.408287	0.586447
337	PHEV	large SUV	0.0690465	0.0586689	0.0710948	0.102118
338	ICEV	large SUV	3.54134	1.50923	1.82888	2.62694
339	HEV	large SUV	2.2316	1.20173	1.45626	2.09171
340	HEV	large SUV	0.264603	0.319387	0.319387	0.465785
341	ICEV	large SUV	21.4322	6.63205	8.0367	11.5436
342	HEV	large SUV	0.286205	0.346556	0.346556	0.507847
343	ICEV	large SUV	2.43006	1.26832	1.53694	2.2076
344	HEV	large SUV	0.902649	0.605034	0.733179	1.05311
345	ICEV	large SUV	15.1348	6.56979	7.96126	11.4352
346	HEV	large SUV	4.63746	2.64666	3.20722	4.60672
347	ICEV	large SUV	10.7479	5.60381	6.79068	9.75385
348	HEV	large SUV	9.72993	6.2589	7.58451	10.8941
349	PHEV	large SUV	1.26259	1.19508	1.44819	2.08012
350	HEV	large SUV	2.64873	0.928318	1.12493	1.61581
351	HEV	Van	5.55187	3.15881	3.82783	5.49814
352	ICEV	Pickup	38.4364	19.0874	19.1784	27.61
353	ICEV	Pickup	11.8053	5.5356	5.56199	8.00729
354	HEV	Pickup	3.62534	1.70948	1.71763	2.47278
355	HEV	large SUV	2.32696	1.4494	1.75638	2.52279
356	ICEV	Sedan	0.296977	0.111442	0.154318	0.218864
357	ICEV	Sedan	1.88187	0.750714	1.03954	1.47434
358	HEV	Sedan	0.581867	0.345853	0.478914	0.679229
359	ICEV	Sedan	2.45989	0.869725	1.20434	1.70807
360	ICEV	Sedan	0.143962	0.0421135	0.0583158	0.0827075
361	HEV	Sedan	0.0806809	0.000722535	0.00100052	0.001419
362	ICEV	Sedan	0.227774	0.0756597	0.104768	0.14859
363	HEV	Sedan	0.0956122	0.0042664	0.00590781	0.00837887
364	ICEV	small SUV	0.579462	0.261574	0.327212	0.458867
365	PHEV	small SUV	0.0483443	0.0130523	0.0163276	0.022897
366	ICEV	Sedan	0.15407	0.0542245	0.0750864	0.106493
367	ICEV	small SUV	2.73636	1.13728	1.42267	1.99509
368	HEV	Sedan	0.563833	0.316505	0.438274	0.62159
369	HEV	small SUV	0.139196	0.164999	0.164999	0.233597
370	ICEV	Sedan	19.9925	9.5003	13.1554	18.6578
371	HEV	Sedan	1.71807	1.11146	1.53908	2.18283
372	ICEV	Sedan	9.72032	5.08252	7.03792	9.98167
373	ICEV	small SUV	2.27988	1.18168	1.47821	2.07297
374	HEV	Sedan	2.06303	1.35086	1.87058	2.65299
375	ICEV	Sedan	1.49658	0.557797	0.772399	1.09547
376	HEV	Sedan	1.03116	0.733201	1.01529	1.43995
377	PHEV	Sedan	0.187799	0.191403	0.265042	0.3759
378	ICEV	small SUV	8.30402	4.23283	5.29499	7.42545
379	HEV	Sedan	1.23097	0.67471	0.934292	1.32508
380	ICEV	large SUV	2.37699	0.786349	0.952896	1.3687
381	PHEV	large SUV	0.161522	0.0733826	0.0889249	0.127728
382	ICEV	large SUV	3.36542	1.24671	1.51076	2.17
383	HEV	large SUV	0.171499	0.208283	0.208283	0.306477
384	ICEV	large SUV	2.03438	0.874073	1.0592	1.52139
385	HEV	large SUV	0.266915	0.322842	0.322842	0.472249
386	HEV	large SUV	7.1527	3.14232	3.80786	5.46945
387	PHEV	large SUV	0.303313	0.192071	0.232751	0.334314
388	HEV	large SUV	2.23737	0.778061	0.942852	1.35427
389	ICEV	large SUV	1.27021	0.484158	0.586701	0.842713
390	HEV	large SUV	1.65461	0.584547	0.708352	1.01745
391	HEV	large SUV	0.174016	0.0499151	0.060487	0.086881
392	ICEV	large SUV	0.969766	0.366215	0.443778	0.637425
393	ICEV	large SUV	0.257457	0.0781786	0.0947366	0.136076
394	ICEV	large SUV	0.477959	0.145136	0.175875	0.25262
395	ICEV	large SUV	0.273445	0.0820433	0.0994198	0.142803
396	PHEV	large SUV	0.0948442	0.00577376	0.00699663	0.0100497
397	ICEV	large SUV	0.160918	0.0313832	0.0380301	0.0546248
398	ICEV	large SUV	7.94062	2.92194	3.5408	5.08586
399	HEV	large SUV	0.941664	1.13475	1.13475	1.65069
400	ICEV	large SUV	0.566854	0.283147	0.343117	0.492839
401	ICEV	large SUV	7.30038	3.33388	4.03999	5.80287
402	HEV	Sedan	0.0511559	0.0627725	0.0627725	0.0935734
403	ICEV	Sedan	0.440734	0.135492	0.187621	0.266097
404	ICEV	Sedan	1.06021	0.310828	0.430413	0.610441
405	ICEV	Sedan	0.582519	0.179085	0.247985	0.35171
406	PHEV	Sedan	0.0843826	0.0305185	0.0422599	0.0599359
407	HEV	Sedan	0.254692	0.304331	0.304331	0.436112
408	HEV	Sedan	0.761014	0.359719	0.498114	0.70646
409	HEV	Sedan	1.27552	0.524526	0.726327	1.03013
410	HEV	Sedan	1.47956	0.60834	0.842387	1.19473
411	HEV	Sedan	0.634142	0.24635	0.341129	0.483812
412	HEV	Sedan	0.0923362	0.033099	0.0458332	0.0650038
413	HEV	Sedan	0.149037	0.0506462	0.0701314	0.0994653
414	HEV	Sedan	0.0861487	0.103547	0.103547	0.149736
415	HEV	small SUV	0.0978566	0.116124	0.116124	0.16466
416	ICEV	Sedan	0.137503	0.0367461	0.0508834	0.0721664
417	HEV	Sedan	0.198991	0.0521945	0.0722754	0.102506
418	HEV	Sedan	0.0388392	0.0466145	0.0466145	0.0672553
419	ICEV	Sedan	0.0952655	0.0298304	0.041307	0.0585845
420	ICEV	Sedan	0.172607	0.055532	0.0768968	0.10906
421	ICEV	Sedan	0.15472	0.0625509	0.0866161	0.122845
422	ICEV	Sedan	0.149343	0.0559104	0.0774209	0.109804
423	ICEV	Sedan	0.52409	0.194431	0.269234	0.381847
424	HEV	Sedan	0.103596	0.0107348	0.0148648	0.0210823
425	HEV	Sedan	0.103596	0.00811991	0.0112439	0.0159469
426	HEV	Sedan	0.124977	0.0265273	0.0367333	0.0520976
427	ICEV	Sedan	0.0876402	0.0144851	0.020058	0.0284476
428	ICEV	Sedan	0.0850987	0.0144851	0.020058	0.0284476
429	ICEV	Sedan	0.191187	0.0498549	0.0690356	0.0979111
430	ICEV	Sedan	0.133559	0.0174441	0.0241553	0.0342588
431	PHEV	Sedan	0.0900466	0.00313098	0.00433557	0.00614901
432	ICEV	Sedan	0.226503	0.00113541	0.00157224	0.00222986
433	ICEV	Sedan	0.199981	0.0484442	0.0670823	0.0951407
434	ICEV	Sedan	0.138926	0.0267338	0.0370191	0.0525031
435	ICEV	Sedan	0.332476	0.130641	0.180903	0.256569
436	ICEV	small SUV	0.726115	0.261046	0.326551	0.45794
437	ICEV	Sedan	0.196966	0.0899728	0.124588	0.1767
438	ICEV	Sedan	0.234157	0.0895255	0.123969	0.175821
439	ICEV	Sedan	0.553394	0.234032	0.324072	0.459622
440	HEV	small SUV	0.771153	0.916248	0.916248	1.30183
441	ICEV	Sedan	2.33206	1.20925	1.67448	2.37487
442	ICEV	small SUV	3.73345	1.87662	2.34753	3.29208
443	HEV	Van	0.133218	0.0614161	0.0744238	0.106899
444	HEV	Van	0.104355	0.0229088	0.0277608	0.0398745
445	HEV	large SUV	1.68772	0.772892	0.936589	1.34528
446	HEV	large SUV	2.44239	1.07224	1.29934	1.86632
447	PHEV	large SUV	0.476919	0.332783	0.403265	0.579234
448	HEV	large SUV	2.81315	1.13296	1.37292	1.972
449	PHEV	large SUV	0.680155	0.457803	0.554765	0.796842
450	HEV	Sedan	0.317608	0.377003	0.377003	0.534821
451	HEV	small SUV	0.293078	0.353718	0.353718	0.514734
452	ICEV	Sedan	0.215591	0.0936543	0.129686	0.18393
453	PHEV	Sedan	0.0830349	0.0578028	0.0800413	0.11352
454	HEV	Sedan	0.132953	0.0529859	0.0733712	0.10406
455	PHEV	Sedan	0.0542473	0.00254607	0.00352563	0.00500029
456	PHEV	Sedan	0.0494255	0.0110445	0.0152936	0.0216905
457	HEV	small SUV	0.174861	0.0781628	0.0977766	0.137117
458	HEV	small SUV	0.298215	0.360681	0.360681	0.526531
459	HEV	small SUV	0.543193	0.234526	0.293377	0.411418

## Sheet: Figure 6 - Materials
A2Mac1 Vehicle #	Vehicle class	Powertrain	% Steel	% Aluminum	% Polymers	% Other
1	Sedan/Small SUV	non-BEV	0.4301	0.237021	0.248977	0.0839023
2	Sedan/Small SUV	non-BEV	0.524702	0.0990309	0.209652	0.166615
3	Sedan/Small SUV	non-BEV	0.513059	0.118507	0.23079	0.137644
4	Sedan/Small SUV	non-BEV	0.599682	0.0723371	0.190995	0.136985
5	Sedan/Small SUV	non-BEV	0.538293	0.0719689	0.216209	0.173529
6	Sedan/Small SUV	non-BEV	0.498682	0.180295	0.245255	0.0757688
7	Sedan/Small SUV	non-BEV	0.510685	0.175812	0.232542	0.080961
8	Sedan/Small SUV	non-BEV	0.468003	0.19381	0.249276	0.0889106
9	Sedan/Small SUV	non-BEV	0.461938	0.0849881	0.270343	0.18273
10	Sedan/Small SUV	non-BEV	0.466687	0.13651	0.334701	0.0621018
11	Sedan/Small SUV	non-BEV	0.478869	0.0857645	0.272769	0.162598
12	Sedan/Small SUV	non-BEV	0.491962	0.16791	0.257619	0.0825093
13	Sedan/Small SUV	non-BEV	0.594908	0.0617973	0.204289	0.139006
14	Sedan/Small SUV	non-BEV	0.348695	0.120579	0.317213	0.213514
15	Sedan/Small SUV	non-BEV	0.447504	0.118211	0.374153	0.0601331
16	Sedan/Small SUV	non-BEV	0.498379	0.0629127	0.272718	0.16599
17	Sedan/Small SUV	non-BEV	0.534375	0.0791638	0.244199	0.142263
18	Sedan/Small SUV	non-BEV	0.476679	0.111725	0.251681	0.159915
19	Sedan/Small SUV	non-BEV	0.505473	0.159566	0.247968	0.0869937
20	Sedan/Small SUV	non-BEV	0.620249	0.05811	0.191566	0.130075
21	Sedan/Small SUV	non-BEV	0.398723	0.235836	0.258304	0.107137
22	Sedan/Small SUV	non-BEV	0.529103	0.118593	0.294976	0.0573286
23	Sedan/Small SUV	non-BEV	0.527389	0.0458185	0.212066	0.214727
24	Sedan/Small SUV	non-BEV	0.469542	0.0572867	0.29629	0.176881
25	Sedan/Small SUV	non-BEV	0.504411	0.0651429	0.276622	0.153824
26	Sedan/Small SUV	non-BEV	0.534143	0.0381535	0.28462	0.143083
27	Sedan/Small SUV	non-BEV	0.508199	0.169231	0.229287	0.0932833
28	Sedan/Small SUV	non-BEV	0.510632	0.137235	0.255463	0.0966701
29	Sedan/Small SUV	non-BEV	0.478297	0.053684	0.296643	0.171376
30	Sedan/Small SUV	non-BEV	0.4497	0.092783	0.263948	0.19357
31	Sedan/Small SUV	non-BEV	0.37957	0.152434	0.29259	0.175406
32	Sedan/Small SUV	BEV	0.401574	0.174105	0.346531	0.0777893
33	Sedan/Small SUV	BEV	0.353302	0.237368	0.337896	0.0714349
34	Sedan/Small SUV	BEV	0.382802	0.131142	0.352105	0.133952
35	Sedan/Small SUV	BEV	0.405899	0.154221	0.364135	0.0757449
36	Sedan/Small SUV	BEV	0.340643	0.165365	0.351152	0.14284
37	Sedan/Small SUV	BEV	0.393338	0.196929	0.347958	0.0617754
38	Sedan/Small SUV	BEV	0.437095	0.152769	0.344058	0.0660785
39	Sedan/Small SUV	BEV	0.453991	0.12805	0.359518	0.0584403
40	Sedan/Small SUV	BEV	0.412031	0.137636	0.386495	0.0638382
41	Sedan/Small SUV	BEV	0.318317	0.221087	0.360924	0.0996707
42	Sedan/Small SUV	BEV	0.533743	0.118157	0.305296	0.0428036
43	Sedan/Small SUV	BEV	0.3227	0.250341	0.34792	0.0790393
44	Sedan/Small SUV	BEV	0.347017	0.231161	0.332476	0.0893459
45	Sedan/Small SUV	BEV	0.399464	0.188426	0.348745	0.0633649
46	Sedan/Small SUV	BEV	0.440112	0.0608874	0.328052	0.170949
47	Sedan/Small SUV	BEV	0.416818	0.180521	0.334665	0.0679965
48	Sedan/Small SUV	BEV	0.326947	0.281866	0.301008	0.0901785
49	Sedan/Small SUV	BEV	0.408575	0.101633	0.343151	0.14664
50	Sedan/Small SUV	BEV	0.258645	0.172529	0.390275	0.178551
51	Sedan/Small SUV	BEV	0.373166	0.192606	0.341927	0.0923003
52	Sedan/Small SUV	BEV	0.48393	0.137613	0.317423	0.0610337
53	Sedan/Small SUV	BEV	0.434034	0.11137	0.338344	0.116253
54	Large SUV/Pickup/Van	non-BEV	0.382165	0.167751	0.25133	0.198754
55	Large SUV/Pickup/Van	non-BEV	0.498657	0.0540785	0.252444	0.194821
56	Large SUV/Pickup/Van	non-BEV	0.471011	0.117875	0.253591	0.157523
57	Large SUV/Pickup/Van	non-BEV	0.386222	0.112158	0.310227	0.191393
58	Large SUV/Pickup/Van	non-BEV	0.390449	0.151832	0.270861	0.186858
59	Large SUV/Pickup/Van	non-BEV	0.295299	0.187243	0.292781	0.224676
60	Large SUV/Pickup/Van	non-BEV	0.327286	0.156834	0.308123	0.207757
61	Large SUV/Pickup/Van	non-BEV	0.603942	0.0373546	0.216652	0.142051
62	Large SUV/Pickup/Van	non-BEV	0.358243	0.156373	0.304357	0.181027
63	Large SUV/Pickup/Van	non-BEV	0.468222	0.0737035	0.278518	0.179556
64	Large SUV/Pickup/Van	non-BEV	0.616655	0.12509	0.168293	0.0899625
65	Large SUV/Pickup/Van	non-BEV	0.461771	0.0676741	0.274525	0.19603
66	Large SUV/Pickup/Van	non-BEV	0.693843	0.052253	0.143432	0.110471
67	Large SUV/Pickup/Van	non-BEV	0.442427	0.116946	0.240905	0.199721
68	Large SUV/Pickup/Van	non-BEV	0.575568	0.120138	0.171701	0.132593
69	Large SUV/Pickup/Van	non-BEV	0.465635	0.0502745	0.300682	0.183409
70	Large SUV/Pickup/Van	non-BEV	0.55548	0.0601408	0.208769	0.17561
71	Large SUV/Pickup/Van	non-BEV	0.464712	0.044542	0.292813	0.197933
72	Large SUV/Pickup/Van	non-BEV	0.546472	0.0529544	0.249875	0.150699
73	Large SUV/Pickup/Van	non-BEV	0.581179	0.0886125	0.174757	0.155451
74	Large SUV/Pickup/Van	non-BEV	0.390608	0.137853	0.265324	0.206215
75	Large SUV/Pickup/Van	non-BEV	0.551085	0.0863418	0.218439	0.144134
76	Large SUV/Pickup/Van	non-BEV	0.433072	0.0909542	0.290139	0.185834
77	Large SUV/Pickup/Van	non-BEV	0.53989	0.0651733	0.244268	0.150669
78	Large SUV/Pickup/Van	non-BEV	0.49122	0.100206	0.196628	0.211946
79	Large SUV/Pickup/Van	non-BEV	0.467331	0.134268	0.286855	0.111545
80	Large SUV/Pickup/Van	non-BEV	0.500839	0.0910962	0.23079	0.177274
81	Large SUV/Pickup/Van	non-BEV	0.627026	0.0404568	0.20424	0.128277
82	Large SUV/Pickup/Van	non-BEV	0.50003	0.199409	0.246836	0.0537258
83	Large SUV/Pickup/Van	non-BEV	0.49994	0.0453796	0.289667	0.165013
84	Large SUV/Pickup/Van	non-BEV	0.589422	0.0550158	0.215185	0.140378
85	Large SUV/Pickup/Van	non-BEV	0.562919	0.0436617	0.256243	0.137176
86	Large SUV/Pickup/Van	non-BEV	0.357439	0.121464	0.302206	0.218892
87	Large SUV/Pickup/Van	non-BEV	0.452593	0.140142	0.305831	0.101434
88	Large SUV/Pickup/Van	non-BEV	0.642259	0.0457362	0.199509	0.112496
89	Large SUV/Pickup/Van	non-BEV	0.376047	0.11919	0.307823	0.196941
90	Large SUV/Pickup/Van	non-BEV	0.398546	0.148325	0.291677	0.161451
91	Large SUV/Pickup/Van	non-BEV	0.687927	0.0395657	0.165267	0.107241
92	Large SUV/Pickup/Van	non-BEV	0.355781	0.127727	0.302935	0.213557
93	Large SUV/Pickup/Van	non-BEV	0.50035	0.153516	0.256203	0.0899308
94	Large SUV/Pickup/Van	non-BEV	0.442099	0.0505273	0.33983	0.167543
95	Large SUV/Pickup/Van	non-BEV	0.47991	0.102463	0.253574	0.164053
96	Large SUV/Pickup/Van	non-BEV	0.453539	0.210002	0.268254	0.0682047
97	Large SUV/Pickup/Van	non-BEV	0.432584	0.132084	0.236585	0.198747
98	Large SUV/Pickup/Van	non-BEV	0.64348	0.125098	0.155738	0.0756843
99	Large SUV/Pickup/Van	non-BEV	0.50035	0.19207	0.222168	0.0854121
100	Large SUV/Pickup/Van	non-BEV	0.502562	0.16757	0.244832	0.0850354
101	Large SUV/Pickup/Van	non-BEV	0.380341	0.204587	0.237012	0.178061
102	Large SUV/Pickup/Van	non-BEV	0.632924	0.0379936	0.197095	0.131988
103	Large SUV/Pickup/Van	non-BEV	0.526311	0.0463088	0.26743	0.159951
104	Large SUV/Pickup/Van	non-BEV	0.53122	0.0503116	0.264479	0.153989
105	Large SUV/Pickup/Van	non-BEV	0.561313	0.0722839	0.201717	0.164686
106	Large SUV/Pickup/Van	non-BEV	0.427775	0.0518835	0.35002	0.170321
107	Large SUV/Pickup/Van	non-BEV	0.379506	0.138862	0.296608	0.185024
108	Large SUV/Pickup/Van	non-BEV	0.602061	0.0972443	0.181306	0.119389
109	Large SUV/Pickup/Van	non-BEV	0.59335	0.12073	0.191935	0.0939851
110	Large SUV/Pickup/Van	non-BEV	0.350682	0.159487	0.27133	0.218501
111	Large SUV/Pickup/Van	non-BEV	0.486418	0.108589	0.256918	0.148075
112	Large SUV/Pickup/Van	non-BEV	0.539224	0.143698	0.240169	0.0769085
113	Large SUV/Pickup/Van	non-BEV	0.392213	0.148692	0.341349	0.117746
114	Large SUV/Pickup/Van	non-BEV	0.366468	0.1466	0.304788	0.182144
115	Large SUV/Pickup/Van	non-BEV	0.408694	0.128101	0.267387	0.195818
116	Large SUV/Pickup/Van	BEV	0.289434	0.106902	0.374323	0.229341
117	Large SUV/Pickup/Van	BEV	0.357331	0.231592	0.326231	0.0848464
118	Large SUV/Pickup/Van	BEV	0.457008	0.130447	0.349395	0.0631505
119	Large SUV/Pickup/Van	BEV	0.537581	0.148106	0.249145	0.0651675
120	Large SUV/Pickup/Van	BEV	0.288431	0.114462	0.360813	0.236295
121	Large SUV/Pickup/Van	BEV	0.455858	0.144039	0.325741	0.0743618
122	Large SUV/Pickup/Van	BEV	0.368623	0.228233	0.321899	0.0812458
123	Large SUV/Pickup/Van	BEV	0.454894	0.132918	0.342304	0.0698835
124	Large SUV/Pickup/Van	BEV	0.348767	0.133219	0.301918	0.216096

## Sheet: Figure S1 -Marginal effects
Powertrain	term	estimate	conf.low	conf.high	var
BEVs	slope	3.90093	2.91483	4.88652	Footprint (m2)
BEVs	ratio	1	1	1	Footprint (m2)
HEVs	slope	16.702	11.8886	24.3367	Footprint (m2)
HEVs	ratio	4.37486	2.85066	7.13822	Footprint (m2)
ICEVs	slope	11.8298	9.84065	14.0641	Footprint (m2)
ICEVs	ratio	3.09652	2.21121	4.36102	Footprint (m2)
PHEVs	slope	8.45795	-0.509233	17.4562	Footprint (m2)
PHEVs	ratio	2.21311	-0.126792	4.80028	Footprint (m2)
BEVs	slope	-1.55216	-1.93071	-1.1355	Efficiency (MPGe)
BEVs	ratio	1	1	1	Efficiency (MPGe)
HEVs	slope	-12.7163	-14.0954	-11.5517	Efficiency (MPGe)
HEVs	ratio	8.34667	6.38487	11.4147	Efficiency (MPGe)
ICEVs	slope	-22.9226	-24.8797	-21.3282	Efficiency (MPGe)
ICEVs	ratio	15.0414	11.6512	20.3291	Efficiency (MPGe)
PHEVs	slope	-7.49103	-9.71822	-5.70001	Efficiency (MPGe)
PHEVs	ratio	4.91933	3.37705	7.34298	Efficiency (MPGe)
BEVs	slope	0.0806359	0.0555176	0.125697	Power (HP)
BEVs	ratio	1	1	1	Power (HP)
HEVs	slope	0.905626	0.818573	1.0122	Power (HP)
HEVs	ratio	11.7605	7.14638	16.4029	Power (HP)
ICEVs	slope	0.672958	0.621474	0.740797	Power (HP)
ICEVs	ratio	8.73958	5.31433	12.2288	Power (HP)
PHEVs	slope	0.554224	0.457324	0.645402	Power (HP)
PHEVs	ratio	7.1978	4.32085	10.3764	Power (HP)

## Sheet: Figure S2 - Crossovers
	ICEV	ICEV	ICEV	ICEV	ICEV	ICEV	ICEV	ICEV
Year	Sedan	Small SUV	Large SUV	Pickup	Sedan	Small SUV	Large SUV	Pickup
0	8.66307	9.28813	11.2599	12.6782	15.5274	17.9036	20.0696	28.1596
1	14.0248	14.6278	19.0811	21.9231	17.3111	19.7908	22.5333	31.5617
2	19.1889	19.7643	26.6403	30.8602	18.8028	21.3624	24.8881	34.71
3	24.4859	25.0343	34.3262	39.8932	20.36	22.9904	26.74	37.2645
4	29.4223	29.9443	41.61	48.5046	21.5173	24.2097	28.6464	39.7912
5	34.2415	34.7377	48.6198	56.7918	22.7438	25.4897	30.0339	41.7062
6	38.9292	39.4003	55.7041	65.1142	23.5898	26.3808	31.4956	43.6117
7	43.7252	44.1719	62.2428	72.8441	24.5255	27.3537	32.4554	44.934
8	48.1636	48.5868	68.5583	80.3125	25.0836	27.9415	33.2141	45.9808
9	52.4489	52.8491	74.9217	87.7789	25.6032	28.4883	34.2057	47.234
10	56.8363	57.2144	80.742	94.6612	26.3095	29.2197	34.8383	48.1052
